# Supplementary material for: Lactitol Supplementation Modulates Intestinal Microbiome in Liver Cirrhotic Patients
Source: Front Med (Lausanne). 2021 Oct 14;8:762930. doi: 10.3389/fmed.2021.762930 (PMC8551616; doi:10.3389/fmed.2021.762930)
Supplement: Supplementary file 4 [file Table_4.XLSX]

## Sheet: Supplementary dataset S4
HC verus LC-pre	Index	Compounds	Pvalue	Fold_Change	Log2FC	Type	hmdb_ID	smpdb_map
	F-GCDCA	Glycochenodeoxycholic acid	0.11356226164134604	0.1308	-2.9346	down	HMDB00637	SMP00720;SMP00035;SMP00315;SMP00314;SMP00318;SMP00317;SMP00316
	F-GDCA	Glycodeoxycholic acid	0.06859747471877496	0.208	-2.2653	down	HMDB00631	SMP00720;SMP00035;SMP00315;SMP00314;SMP00318;SMP00317;SMP00316
	F-GCA	Glycocholic acid	0.1599291308764794	0.4495	-1.1536	down	HMDB00138	SMP00720;SMP00035;SMP00315;SMP00314;SMP00318;SMP00317;SMP00316
	#KEGG_n	3	KEGG_N	16
	#Pathway	ko_ID	Unique compound	compound	Uni_all	compound_all
	Primary bile acid biosynthesis	ko00120	2	6	3	16	GCDCA(down);GCA(down)	C05466(down)+C01921(down)
	Bile secretion	ko04976	2	8	3	16	GCA(down);GCDCA(down)	C01921(down)+C05466(down)
	Cholesterol metabolism	ko04979	2	4	3	16	GCDCA(down);GCA(down)	C05466(down)+C01921(down)
	Metabolic pathways	ko01100	1	4	3	16	GCA(down)	C01921(down)
	#Kegg_pathway	ko_id	Cluter_frequency	Genome_frequency	P-value	Corrected_P-value
	Cholesterol metabolism	ko04979	2 out of 3 66.6666666666667%	4 out of 16 25%	0.135714285714286	0.542857142857143
	Primary bile acid biosynthesis	ko00120	2 out of 3 66.6666666666667%	6 out of 16 37.5%	0.303571428571429	1
	Bile secretion	ko04976	2 out of 3 66.6666666666667%	8 out of 16 50%	0.5	1
	Metabolic pathways	ko01100	1 out of 3 33.3333333333333%	4 out of 16 25%	0.607142857142857	1
HC verus LC-post	Index	Compounds	Pvalue	Fold_Change	Log2FC	Type
	F-LCA	Lithocholic acid	0.000660729	0.4468	-1.1623	down
	F-GLCA	Glycolithocholic acid	0.0328963	0.3374	-1.5675	down
	F-GCDCA	Glycochenodeoxycholic acid	0.153422	0.2007	-2.3169	down
	F-GDCA	Glycodeoxycholic acid	0.049934	0.1499	-3.1831	down
	#KEGG_n	4	KEGG_N	16
	#Pathway	ko_ID	Unique compound	compound	Uni_all	compound_all
	Bile secretion	ko04976	2	8	4	16	GCDCA(down);LCA(down)	C05466(down)+C03990(down)
	Primary bile acid biosynthesis	ko00120	1	6	4	16	GCDCA(down)	C05466(down)
	Cholesterol metabolism	ko04979	1	4	4	16	GCDCA(down)	C05466(down)
	#Kegg_pathway	ko_id	Cluter_frequency	Genome_frequency	P-value	Corrected_P-value
	Bile secretion	ko04976	2 out of 4 50%	8 out of 16 50%	0.715384615384616	1
	Cholesterol metabolism	ko04979	1 out of 4 25%	4 out of 16 25%	0.728021978021978	1
	Primary bile acid biosynthesis	ko00120	1 out of 4 25%	6 out of 16 37.5%	0.884615384615384	1
LC-pre verus LC-post	Index	Compounds	Pvalue	Fold_Change	Log2FC	Type	cpd_ID	kegg_map
	F-TDCA	Taurodeoxycholic acid	0.463295	0.4921	-1.023	down	C05463	--
	F-TUDCA	Tauroursodeoxycholic acid	0.106774	0.2946	-1.7632	down	C16868	--
	F-TCDCA	Taurochenodeoxycholic acid	0.16611	0.2019	-2.3083	down	C05465	ko00120,ko04976,ko04979
	F-Tβ-MCA	Tauro-β-muricholic acid	0.324518	0.1837	-2.4446	down	--	--
	F-TCA	Taurocholic acid	0.242816	0.1262	-2.9862	down	C05122	ko00120,ko00430,ko01100,ko04976,ko04979
	#KEGG_n	4	KEGG_N	15
	#Pathway	ko_ID	Unique compound	compound	Uni_all	compound_all
	Primary bile acid biosynthesis	ko00120	2	6	4	15	TCDCA(down);TCA(down)	C05465(down)+C05122(down)
	Bile secretion	ko04976	2	8	4	15	TCA(down);TCDCA(down)	C05122(down)+C05465(down)
	Cholesterol metabolism	ko04979	2	4	4	15	TCDCA(down);TCA(down)	C05465(down)+C05122(down)
	Taurine and hypotaurine metabolism	ko00430	1	1	4	15	TCA(down)	C05122(down)
	Metabolic pathways	ko01100	1	4	4	15	TCA(down)	C05122(down)
	#Kegg_pathway	ko_id	Cluter_frequency	Genome_frequency	P-value	Corrected_P-value
	Taurine and hypotaurine metabolism	ko00430	1 out of 4 25%	1 out of 15 6.66666666666667%	0.266666666666667	1
	Cholesterol metabolism	ko04979	2 out of 4 50%	4 out of 15 26.6666666666667%	0.274725274725274	1
	Primary bile acid biosynthesis	ko00120	2 out of 4 50%	6 out of 15 40%	0.538461538461539	1
	Metabolic pathways	ko01100	1 out of 4 25%	4 out of 15 26.6666666666667%	0.758241758241758	1
	Bile secretion	ko04976	2 out of 4 50%	8 out of 15 53.3333333333333%	0.769230769230769	1
