# Supplementary material for: Lactitol Supplementation Modulates Intestinal Microbiome in Liver Cirrhotic Patients
Source: Frontiers journal article supplement (doi:10.3389/fmed.2021.762930), 2021-10-14
Supplement: Table_3.xls [file Table_3.xls]

## Sheet: Supplementary dataset S3A
LC_pre vs HCs
ID	baseMean	log2FoldChange	lfcSE	stat	pvalue	padj	sig	logP	label
K01602	55.142	-26.4311	1.9184	-13.7776	3.4742e-43	1.80485e-39	Down	38.7436	K01602
K06876	6.30947	20.9188	1.53864	13.5956	4.25217e-42	1.1045e-38	Up	37.9568	K06876
K15236	15.8184	-24.7538	2.09549	-11.8129	3.34851e-32	5.79851e-29	Down	28.2367	K15236
K13143	6.02333	-22.9823	2.04737	-11.2253	3.06504e-29	3.98072e-26	Down	25.4	K13143
K10143	7.06182	-23.715	2.22154	-10.675	1.33231e-26	1.38427e-23	Down	22.8588	K10143
K09187	7.99634	16.1309	2.25056	7.16751	7.63715e-13	6.6125e-10	Up	9.17963	K09187
K15790	10.3856	9.96984	1.39938	7.12447	1.0448e-12	7.75387e-10	Up	9.11048	K15790
K15256	307.7	3.11569	0.478483	6.5116	7.43524e-11	4.82826e-08	Up	7.31621	K15256
K02658	699.579	-4.76153	0.73925	-6.44102	1.18671e-10	6.84994e-08	Down	7.16431	K02658
K11263	463.483	3.43062	0.550374	6.23325	4.56869e-10	2.37343e-07	Up	6.62462	K11263
K06121	165.039	3.0354	0.512996	5.91701	3.27846e-09	1.54833e-06	Up	5.81014	K06121
K07482	10117.9	-2.2969	0.391677	-5.86427	4.51121e-09	1.95298e-06	Down	5.7093	K07482
K10742	1789.5	-4.1674	0.712396	-5.84983	4.9207e-09	1.96639e-06	Down	5.70633	K10742
K07217	189.748	2.79752	0.487035	5.74399	9.24729e-09	3.43141e-06	Up	5.46453	K07217
K15553	12.1664	6.30941	1.11254	5.67115	1.41841e-08	4.91241e-06	Up	5.30871	K15553
K00619	210.85	1.99925	0.354496	5.6397	1.70348e-08	5.02262e-06	Up	5.29907	K00619
K01699	308.874	2.31328	0.410366	5.63711	1.72926e-08	5.02262e-06	Up	5.29907	K01699
K04021	443.318	2.65486	0.471052	5.63602	1.74027e-08	5.02262e-06	Up	5.29907
K16922	691.542	-3.69309	0.657413	-5.61761	1.9362e-08	5.29399e-06	Down	5.27622	K16922
K00889	122.706	-3.87322	0.693977	-5.58119	2.38874e-08	6.20476e-06	Down	5.20727	K00889
K06122	96.7209	3.02302	0.547824	5.51823	3.42424e-08	8.47092e-06	Up	5.07207
K15269	142.318	4.68993	0.852548	5.50108	3.77481e-08	8.91369e-06	Up	5.04994
K16132	289.361	4.60365	0.840227	5.47905	4.27617e-08	9.65857e-06	Up	5.01509
K04718	108.407	-7.97555	1.46801	-5.43292	5.54404e-08	1.20005e-05	Down	4.9208	K04718
K11083	42.3234	5.03931	0.934062	5.39505	6.85032e-08	1.4235e-05	Up	4.84664
K01531	5895.56	-1.60846	0.3	-5.36153	8.25215e-08	1.64884e-05	Down	4.78282
K00116	315.109	2.65861	0.496772	5.35178	8.70945e-08	1.67576e-05	Up	4.77579
K00114	184.435	3.07955	0.57751	5.33247	9.68875e-08	1.73562e-05	Up	4.76054
K11750	178.482	3.47377	0.651415	5.33265	9.67898e-08	1.73562e-05	Up	4.76054
K03430	1856.19	-2.2183	0.419539	-5.28747	1.2402e-07	2.14761e-05	Down	4.66804
K05714	77.6265	3.58003	0.677936	5.28078	1.28636e-07	2.1557e-05	Up	4.66641
K01792	340.525	2.74792	0.522214	5.26206	1.42447e-07	2.24247e-05	Up	4.64927
K09471	377.586	2.54841	0.484189	5.26324	1.41536e-07	2.24247e-05	Up	4.64927
K05548	207.714	3.03637	0.585058	5.18987	2.10438e-07	3.05819e-05	Up	4.51454
K19228	73.1517	2.70685	0.521695	5.18856	2.11924e-07	3.05819e-05	Up	4.51454
K06986	13.6395	-5.40054	1.04347	-5.17557	2.2721e-07	3.19016e-05	Down	4.49619
K07115	233.67	2.18043	0.422686	5.15851	2.48928e-07	3.40311e-05	Up	4.46812
K02591	152.823	2.76555	0.53805	5.13995	2.74808e-07	3.63897e-05	Up	4.43902
K04561	177.19	2.94988	0.574318	5.13631	2.8019e-07	3.63897e-05	Up	4.43902
K07708	242.96	2.30552	0.450429	5.11851	3.07964e-07	3.90213e-05	Up	4.4087
K03338	91.1848	2.08147	0.412371	5.04757	4.47456e-07	5.28303e-05	Up	4.27712
K05819	541.647	2.75013	0.544768	5.04826	4.4585e-07	5.28303e-05	Up	4.27712
K02362	201.113	3.54399	0.704592	5.02984	4.90881e-07	5.42645e-05	Up	4.26548
K02475	377.949	1.7803	0.353948	5.02982	4.90939e-07	5.42645e-05	Up	4.26548
K12981	87.7538	4.3369	0.861756	5.03263	4.83792e-07	5.42645e-05	Up	4.26548
K09824	415.285	2.15731	0.430143	5.01534	5.29405e-07	5.61277e-05	Up	4.25082
K08256	58.7817	3.08482	0.619269	4.98139	6.31283e-07	6.55903e-05	Up	4.18316
K03381	59.0679	4.09134	0.8232	4.97005	6.69358e-07	6.81826e-05	Up	4.16633
K00129	101.845	3.45962	0.697267	4.96169	6.98837e-07	6.90015e-05	Up	4.16114
K06915	5993.96	-1.84645	0.374928	-4.92482	8.44396e-07	7.97571e-05	Down	4.09823
K16036	63.4745	-3.84896	0.783621	-4.91177	9.0259e-07	8.37313e-05	Down	4.07711
K03597	92.5918	3.1235	0.636591	4.9066	9.26673e-07	8.44573e-05	Up	4.07336
K14056	143.383	1.87057	0.382084	4.89571	9.79494e-07	8.77322e-05	Up	4.05684
K06599	50.355	4.6767	0.966443	4.83909	1.30437e-06	0.000105598	Up	3.97634
K07641	431.435	2.00996	0.415647	4.83574	1.32652e-06	0.000105598	Up	3.97634
K13003	440.325	-5.0091	1.03633	-4.83349	1.34158e-06	0.000105598	Down	3.97634
K16650	69.951	5.18131	1.06941	4.84501	1.26605e-06	0.000105598	Up	3.97634
K18303	1273.77	1.48501	0.306795	4.84039	1.29583e-06	0.000105598	Up	3.97634
K03808	384.966	2.68011	0.556961	4.81203	1.49405e-06	0.000114141	Up	3.94256
K06237	626.823	-2.25986	0.469416	-4.81419	1.478e-06	0.000114141	Down	3.94256
K09891	92.6385	2.94925	0.61382	4.80475	1.54947e-06	0.00011666	Up	3.93308
K03786	134.722	1.95672	0.407803	4.79819	1.60102e-06	0.000118819	Up	3.92511
K02072	2170.77	1.0023	0.209357	4.7875	1.6887e-06	0.000120201	Up	3.92009
K05851	320.922	2.62303	0.547518	4.79077	1.66146e-06	0.000120201	Up	3.92009
K13485	15.183	4.94347	1.03259	4.78746	1.68906e-06	0.000120201	Up	3.92009
K08162	341.579	2.48714	0.521237	4.7716	1.82766e-06	0.000126048	Up	3.89946
K08589	1051.74	-3.38857	0.710421	-4.76981	1.84401e-06	0.000126048	Down	3.89946
K00481	70.7327	2.48026	0.5208	4.76242	1.9129e-06	0.000128235	Up	3.89199
K13308	1846.35	-1.96519	0.412759	-4.7611	1.92538e-06	0.000128235	Down	3.89199
K13794	68.5756	2.70449	0.568351	4.75849	1.95046e-06	0.000128261	Up	3.8919
K01214	9.85469	3.31156	0.699058	4.73717	2.1672e-06	0.000136332	Up	3.8654
K03735	401.403	1.65371	0.348973	4.73878	2.15004e-06	0.000136332	Up	3.8654
K08365	175.894	2.38484	0.503724	4.73443	2.19676e-06	0.000136332	Up	3.8654
K02511	820.03	2.63723	0.558286	4.7238	2.31475e-06	0.000141472	Up	3.84933
K03475	128.287	2.85859	0.605781	4.71885	2.37176e-06	0.000143271	Up	3.84384
K09159	47.2628	2.66728	0.566632	4.70725	2.51082e-06	0.000146832	Up	3.83318
K13923	72.2947	3.34799	0.711299	4.70687	2.5155e-06	0.000146832	Up	3.83318
K00984	749.346	2.49443	0.533191	4.67831	2.89251e-06	0.000163333	Up	3.78693
K03382	22.9319	2.57788	0.550881	4.67956	2.87485e-06	0.000163333	Up	3.78693
K07223	466.591	1.97096	0.421015	4.68145	2.84858e-06	0.000163333	Up	3.78693
K06181	137.533	2.15984	0.463227	4.66259	3.12255e-06	0.000163857	Up	3.78554
K07229	200.657	2.19473	0.470457	4.6651	3.08467e-06	0.000163857	Up	3.78554
K10001	69.6589	3.64533	0.780395	4.67113	2.99551e-06	0.000163857	Up	3.78554
K11533	1467.9	2.45077	0.525312	4.66537	3.08069e-06	0.000163857	Up	3.78554
K04029	225.558	1.6303	0.350481	4.6516	3.29365e-06	0.000165768	Up	3.7805
K08643	5.78247	-5.87584	1.26228	-4.65493	3.24091e-06	0.000165768	Down	3.7805
K09472	185.439	2.69762	0.579807	4.65263	3.27733e-06	0.000165768	Up	3.7805
K09984	9.81022	4.82971	1.03864	4.65005	3.31856e-06	0.000165768	Up	3.7805
K05603	23.8177	5.6551	1.21685	4.64731	3.36293e-06	0.000166385	Up	3.77889
K01697	802.355	1.9902	0.43047	4.62331	3.77658e-06	0.000185088	Up	3.73262
K03732	596.106	2.26526	0.49096	4.61395	3.95089e-06	0.000190045	Up	3.72114
K14519	26.363	2.39759	0.524005	4.5755	4.75087e-06	0.000224371	Up	3.64903
K06929	112.411	1.85095	0.405545	4.56409	5.01662e-06	0.000232691	Up	3.63322
K11939	236.874	2.1842	0.478381	4.56581	4.97578e-06	0.000232691	Up	3.63322
K07168	62.4462	2.83827	0.622253	4.56128	5.08436e-06	0.000233745	Up	3.63126
K09975	112.418	2.18843	0.48041	4.55533	5.23026e-06	0.000238344	Up	3.6228
K00863	915.939	1.6899	0.371436	4.54964	5.37367e-06	0.0002386	Up	3.62233
K09945	53.5109	3.57189	0.785043	4.54993	5.36636e-06	0.0002386	Up	3.62233
K04565	137.196	1.87827	0.413035	4.5475	5.42882e-06	0.000239006	Up	3.62159
K04032	178.625	1.63859	0.36056	4.54457	5.50466e-06	0.000240308	Up	3.61923
K07640	349.55	2.14883	0.474369	4.52988	5.90161e-06	0.00025549	Up	3.59263
K03844	34.2352	-6.34118	1.40437	-4.51531	6.32248e-06	0.000269756	Down	3.56903
K18009	97.6405	2.6055	0.577097	4.51484	6.33655e-06	0.000269756	Up	3.56903
K13634	346.541	2.67504	0.593589	4.50656	6.58882e-06	0.000271658	Up	3.56598
K12957	148.376	2.76804	0.61838	4.47627	7.59586e-06	0.000308641	Up	3.51055
K04099	64.9827	4.3097	0.964067	4.47033	7.80985e-06	0.000312986	Up	3.50448
K13256	140.417	1.91649	0.428772	4.46972	7.83217e-06	0.000312986	Up	3.50448
K02476	841.259	1.53613	0.343987	4.46565	7.98244e-06	0.000316556	Up	3.49955
K03277	144.858	3.27868	0.73483	4.46182	8.12653e-06	0.000316739	Up	3.4993
K07782	102.598	2.86739	0.642704	4.46144	8.14102e-06	0.000316739	Up	3.4993
K05775	140.857	2.97985	0.669025	4.45402	8.42782e-06	0.000320119	Up	3.49469
K18302	555.803	1.40106	0.314587	4.45366	8.44201e-06	0.000320119	Up	3.49469
K07122	84.0501	1.76034	0.395723	4.44842	8.65049e-06	0.000325647	Up	3.48725
K16090	219.677	3.01772	0.67863	4.44679	8.71622e-06	0.000325761	Up	3.4871
K02430	103.757	2.74722	0.620723	4.42585	9.60646e-06	0.000349758	Up	3.45623
K09890	40.5597	2.81746	0.636661	4.42537	9.6276e-06	0.000349758	Up	3.45623
K16050	59.9985	4.18431	0.946083	4.42277	9.74442e-06	0.000351543	Up	3.45402
K05880	182.423	1.97768	0.447684	4.41758	9.981e-06	0.000357595	Up	3.44661
K08990	154.708	2.09598	0.475629	4.40675	1.04932e-05	0.00037109	Up	3.43052
K11070	144.085	1.87869	0.426335	4.4066	1.05005e-05	0.00037109	Up	3.43052
K03747	49.7473	3.27603	0.743953	4.40355	1.06493e-05	0.000373805	Up	3.42735
K10805	248.839	2.40079	0.545585	4.4004	1.0805e-05	0.000376725	Up	3.42398
K03777	211.906	2.63003	0.598539	4.39409	1.11239e-05	0.000385257	Up	3.41425
K00117	458.14	2.19385	0.499807	4.3894	1.13664e-05	0.000391051	Up	3.40777
K02167	98.1551	2.81456	0.641927	4.38455	1.16226e-05	0.000397233	Up	3.40095
K01721	11.7777	6.24903	1.42698	4.3792	1.19113e-05	0.000404239	Up	3.39336
K07146	127.985	2.623	0.599332	4.37653	1.20581e-05	0.000404239	Up	3.39336
K09898	22.9558	2.83719	0.648282	4.37648	1.2061e-05	0.000404239	Up	3.39336
K02043	427.938	2.38232	0.544617	4.3743	1.21824e-05	0.000405688	Up	3.39181
K00819	399.694	2.1548	0.493615	4.36535	1.26918e-05	0.000409527	Up	3.38772
K07345	1130.77	2.25797	0.517193	4.36581	1.26654e-05	0.000409527	Up	3.38772
K19267	190.703	1.84268	0.422642	4.3599	1.30124e-05	0.000417281	Up	3.37957
K00098	165.466	2.62048	0.601555	4.35617	1.32357e-05	0.000421837	Up	3.37486
K07153	94.9471	2.64806	0.608073	4.35483	1.3317e-05	0.000421841	Up	3.37485
K00060	189.58	2.07593	0.477491	4.34759	1.37644e-05	0.000431524	Up	3.36499
K02584	200.924	1.97888	0.455209	4.3472	1.37888e-05	0.000431524	Up	3.36499
K09762	3749.45	-1.04861	0.241376	-4.34429	1.39727e-05	0.000432073	Down	3.36444
K04103	148.137	3.47652	0.801309	4.33855	1.43428e-05	0.000435735	Up	3.36078
K07268	157.587	2.32723	0.536938	4.33427	1.46247e-05	0.000441717	Up	3.35486
K03317	827.754	1.54613	0.357276	4.32756	1.50768e-05	0.000450346	Up	3.34645
K10000	33.7671	2.75526	0.636691	4.32746	1.50838e-05	0.000450346	Up	3.34645
K10112	118.814	1.80343	0.417866	4.31582	1.59014e-05	0.000461497	Up	3.33583
K11932	170.973	2.91325	0.674478	4.31926	1.56554e-05	0.000461497	Up	3.33583
K14055	155.431	2.5032	0.57975	4.31773	1.57642e-05	0.000461497	Up	3.33583
K03226	32.8173	2.52276	0.585142	4.31137	1.62249e-05	0.000466434	Up	3.33121
K06152	59.5077	3.11797	0.723257	4.31101	1.62511e-05	0.000466434	Up	3.33121
K02850	74.5283	3.53562	0.820675	4.30819	1.64596e-05	0.000469821	Up	3.32807
K07495	45942.2	-1.9812	0.46028	-4.30434	1.67483e-05	0.000472867	Down	3.32526
K10007	91.2324	2.63934	0.613013	4.30553	1.6659e-05	0.000472867	Up	3.32526
K06136	67.3011	3.70517	0.862865	4.29404	1.75454e-05	0.000489118	Up	3.31059
K14060	162.225	2.08842	0.486306	4.29447	1.75114e-05	0.000489118	Up	3.31059
K13571	443.734	2.92192	0.681254	4.28903	1.79454e-05	0.000495884	Up	3.30462
K08321	395.305	1.55586	0.362927	4.28697	1.81124e-05	0.000497853	Up	3.3029
K00101	437.6	1.71343	0.400457	4.27869	1.87996e-05	0.000498286	Up	3.30252
K01042	746.369	1.31341	0.306836	4.28048	1.86491e-05	0.000498286	Up	3.30252
K05526	186.608	2.27003	0.530532	4.27878	1.87923e-05	0.000498286	Up	3.30252
K07678	410.381	2.16727	0.506264	4.28092	1.86125e-05	0.000498286	Up	3.30252
K18567	40.178	4.49073	1.04878	4.28188	1.85322e-05	0.000498286	Up	3.30252
K09900	47.4037	2.4817	0.580767	4.27314	1.92742e-05	0.000504232	Up	3.29737
K19230	69.9956	2.78893	0.655412	4.25523	2.08831e-05	0.00053974	Up	3.26782
K03314	301.004	2.43195	0.57195	4.25204	2.11831e-05	0.000544784	Up	3.26378
K00140	251.759	2.16226	0.509096	4.24724	2.16419e-05	0.000548437	Up	3.26087
K03146	425.492	-2.79177	0.657204	-4.24796	2.15728e-05	0.000548437	Down	3.26087
K06074	103.101	2.66952	0.629928	4.23781	2.25706e-05	0.000569195	Up	3.24474
K05802	1392.87	1.88472	0.445747	4.22823	2.35536e-05	0.000585459	Up	3.2325
K05962	250.304	2.4699	0.58454	4.22537	2.38553e-05	0.000590134	Up	3.22905
K00141	112.104	3.80607	0.901532	4.22178	2.42378e-05	0.000596756	Up	3.2242
K00476	76.5525	4.22078	1.00018	4.22003	2.44266e-05	0.000598568	Up	3.22289
K00055	71.4663	3.88151	0.920473	4.21687	2.47721e-05	0.000604184	Up	3.21883
K04062	20.1094	2.45411	0.582326	4.21431	2.50538e-05	0.000608199	Up	3.21595
K04774	133.474	2.328	0.553062	4.2093	2.56169e-05	0.00061465	Up	3.21137
K05882	395.064	2.34115	0.556751	4.20503	2.61047e-05	0.000620767	Up	3.20707
K18540	127.761	2.03532	0.484207	4.20341	2.62928e-05	0.000620868	Up	3.207
K08680	204.719	1.98156	0.472176	4.19665	2.70889e-05	0.000633904	Up	3.19798
K15268	130.398	2.60607	0.62088	4.19738	2.70025e-05	0.000633904	Up	3.19798
K01175	175.081	1.53138	0.365638	4.18824	2.81128e-05	0.000643375	Up	3.19154
K14393	304.643	2.12205	0.506572	4.18904	2.80138e-05	0.000643375	Up	3.19154
K15722	17.568	3.10154	0.740915	4.18609	2.83803e-05	0.000646648	Up	3.18933
K01227	9705.32	-1.42256	0.340207	-4.18145	2.89659e-05	0.000655116	Down	3.18368
K03841	200.383	1.97089	0.471639	4.17881	2.93042e-05	0.000657255	Up	3.18227
K07401	24.5267	4.11198	0.984096	4.17844	2.93519e-05	0.000657255	Up	3.18227
K04028	152.298	1.30406	0.312611	4.17151	3.02583e-05	0.000673148	Up	3.17189
K04568	208.035	2.51121	0.602276	4.16953	3.05232e-05	0.000674758	Up	3.17085
K11102	178.885	2.62451	0.630241	4.1643	3.12313e-05	0.000681709	Up	3.1664
K02623	138.794	2.59867	0.624735	4.15963	3.18759e-05	0.000689981	Up	3.16116
K03573	156.99	2.27995	0.548013	4.16039	3.17698e-05	0.000689981	Up	3.16116
K05818	110.041	2.89887	0.69797	4.15329	3.2773e-05	0.000698204	Up	3.15602
K07251	123.856	2.60878	0.627969	4.15432	3.26259e-05	0.000698204	Up	3.15602
K07286	63.8886	2.53039	0.60926	4.15322	3.27836e-05	0.000698204	Up	3.15602
K01427	10.9441	3.49355	0.842539	4.14646	3.37661e-05	0.000713068	Up	3.14687
K01617	292.335	2.17744	0.525873	4.14062	3.46373e-05	0.000725737	Up	3.13922
K12998	312.44	-1.78942	0.432256	-4.13971	3.47741e-05	0.000725737	Down	3.13922
K03318	188.409	2.54175	0.614592	4.13567	3.53922e-05	0.000729614	Up	3.13691
K09911	45.5182	3.11477	0.753144	4.1357	3.53879e-05	0.000729614	Up	3.13691
K00065	146.971	2.06485	0.500664	4.12422	3.71994e-05	0.000742113	Up	3.12953
K00799	1164.61	1.62705	0.394408	4.12529	3.7026e-05	0.000742113	Up	3.12953
K03293	3766.61	1.27551	0.309224	4.12489	3.7091e-05	0.000742113	Up	3.12953
K09923	65.6341	2.10713	0.511091	4.12281	3.74271e-05	0.000742113	Up	3.12953
K09952	7975.42	-1.22913	0.297979	-4.1249	3.70898e-05	0.000742113	Down	3.12953
K13788	530.701	1.64207	0.398239	4.12333	3.7343e-05	0.000742113	Up	3.12953
K01706	578.948	1.67078	0.40595	4.11572	3.8598e-05	0.000756667	Up	3.1211
K07357	152.85	3.10469	0.754863	4.11292	3.90693e-05	0.000759226	Up	3.11963
K07676	329.743	2.86931	0.697733	4.11234	3.9167e-05	0.000759226	Up	3.11963
K08254	136.292	2.63339	0.64015	4.1137	3.89367e-05	0.000759226	Up	3.11963
K15550	325.272	2.75662	0.670711	4.11	3.95662e-05	0.000764112	Up	3.11684
K04025	77.5134	2.27463	0.554353	4.10322	4.07447e-05	0.000775343	Up	3.11051
K11312	119.891	-3.22221	0.78524	-4.10348	4.06987e-05	0.000775343	Down	3.11051
K15257	115.35	2.5316	0.61754	4.0995	4.14045e-05	0.000785024	Up	3.10512
K06893	53.6447	3.52916	0.86233	4.09259	4.26579e-05	0.000800028	Up	3.09689
K10017	126.663	2.96357	0.725488	4.08493	4.40904e-05	0.000818827	Up	3.08681
K14161	19.8536	5.70937	1.39774	4.0847	4.41331e-05	0.000818827	Up	3.08681
K02853	285.057	2.68334	0.657069	4.08379	4.43063e-05	0.000819115	Up	3.08666
K03656	563.582	1.81644	0.444996	4.08193	4.46629e-05	0.000822779	Up	3.08472
K18997	34.9437	2.11449	0.518669	4.07675	4.56694e-05	0.000832465	Up	3.07963
K00007	154.873	3.27545	0.804612	4.07085	4.68429e-05	0.000847905	Up	3.07165
K03288	163.26	3.54902	0.872662	4.06689	4.76457e-05	0.000859443	Up	3.06578
K13069	236.655	2.89791	0.713386	4.06219	4.86148e-05	0.000872944	Up	3.05901
K02062	129.643	1.81993	0.448631	4.05662	4.97882e-05	0.000888831	Up	3.05118
K14051	282.039	2.4514	0.605041	4.05163	5.08626e-05	0.000901814	Up	3.04488
K03520	34.5872	4.66995	1.15354	4.04835	5.15811e-05	0.000911441	Up	3.04027
K03598	224.076	1.9354	0.478702	4.04301	5.27693e-05	0.000921842	Up	3.03534
K04031	175.301	1.31815	0.325972	4.04376	5.26003e-05	0.000921842	Up	3.03534
K03490	176.933	1.8645	0.461597	4.03923	5.36261e-05	0.000931732	Up	3.03071
K03566	738.107	2.13529	0.529269	4.03443	5.47361e-05	0.000935376	Up	3.02901
K03762	1272.9	1.88903	0.468159	4.03501	5.45996e-05	0.000935376	Up	3.02901
K04063	65.3838	1.91062	0.473445	4.03556	5.44728e-05	0.000935376	Up	3.02901
K05527	87.6847	2.42063	0.599917	4.03494	5.46169e-05	0.000935376	Up	3.02901
K05803	187.807	2.42171	0.599966	4.03641	5.42744e-05	0.000935376	Up	3.02901
K02681	72.2653	2.76406	0.68571	4.03094	5.55548e-05	0.000943161	Up	3.02541
K13979	183.875	2.70188	0.670276	4.031	5.55402e-05	0.000943161	Up	3.02541
K01484	240.786	2.46482	0.612023	4.02734	5.64124e-05	0.000951502	Up	3.02159
K05838	406.176	1.70478	0.423223	4.02809	5.6232e-05	0.000951502	Up	3.02159
K04067	128.985	2.14073	0.531828	4.02523	5.69191e-05	0.000956941	Up	3.01911
K03464	20.0667	4.05757	1.00837	4.02389	5.72448e-05	0.000959311	Up	3.01804
K05898	134.413	2.10713	0.524481	4.01755	5.88051e-05	0.000980001	Up	3.00877
K09781	163.518	2.39757	0.596803	4.01735	5.88567e-05	0.000980001	Up	3.00877
K09021	51.8088	2.05467	0.511925	4.01362	5.97948e-05	0.000986139	Up	3.00606
K10429	182.682	-4.29718	1.07161	-4.01003	6.07106e-05	0.000994925	Down	3.00221
K16044	377.569	1.6537	0.412391	4.01004	6.07094e-05	0.000994925	Up	3.00221
K06918	243.943	1.96373	0.489824	4.00906	6.09615e-05	0.000995896	Up	3.00179
K15835	125.495	2.3723	0.593612	3.99638	6.43179e-05	0.00104416	Up	2.98123
K17463	88.8456	2.76565	0.692236	3.99525	6.46268e-05	0.00104591	Up	2.98051
K08296	157.634	1.70308	0.426437	3.99374	6.5038e-05	0.00104929	Up	2.9791
K02364	499.412	2.0557	0.515074	3.99108	6.57727e-05	0.0010546	Up	2.97691
K01716	81.8533	2.3262	0.583271	3.9882	6.6576e-05	0.00106093	Up	2.97431
K01766	400.423	2.02406	0.507455	3.98864	6.64522e-05	0.00106093	Up	2.97431
K02526	371.196	1.35275	0.3393	3.98688	6.69466e-05	0.00106132	Up	2.97415
K02746	387.588	1.35826	0.34113	3.98165	6.84379e-05	0.0010751	Up	2.96855
K00325	266.887	1.83102	0.460059	3.97996	6.89262e-05	0.00107853	Up	2.96717
K05774	119.114	2.36912	0.595555	3.97801	6.94951e-05	0.00108092	Up	2.96621
K01637	174.071	1.64766	0.414575	3.97434	7.05743e-05	0.00108793	Up	2.9634
K01087	114.227	2.69552	0.678472	3.97294	7.09921e-05	0.00109114	Up	2.96212
K16148	39.9941	2.94195	0.740955	3.97049	7.17254e-05	0.00109916	Up	2.95894
K09915	103.842	2.57979	0.650303	3.96705	7.27665e-05	0.00110857	Up	2.95524
K18476	141.11	3.05431	0.770358	3.9648	7.34573e-05	0.00111257	Up	2.95367
K01166	94.1241	2.28119	0.575793	3.96181	7.43824e-05	0.0011233	Up	2.9495
K19803	129.812	2.09223	0.528269	3.96055	7.47788e-05	0.00112602	Up	2.94846
K07156	74.7378	3.05431	0.771401	3.95943	7.51277e-05	0.001128	Up	2.94769
K07798	457.027	1.39293	0.352104	3.95601	7.62118e-05	0.0011377	Up	2.94397
K08219	215.195	2.5412	0.642332	3.95621	7.61473e-05	0.0011377	Up	2.94397
K16066	6.97963	3.91763	0.990587	3.95486	7.65789e-05	0.00113991	Up	2.94313
K19353	6307.41	-1.50106	0.379958	-3.95059	7.79574e-05	0.00115381	Down	2.93786
K09018	270.883	2.66804	0.675571	3.94932	7.83745e-05	0.00115669	Up	2.93678
K09475	689.219	1.94573	0.492882	3.94766	7.89175e-05	0.00116141	Up	2.93502
K05796	144.063	2.40931	0.610554	3.94611	7.9431e-05	0.00116566	Up	2.93343
K01121	95.4233	2.53443	0.642482	3.94475	7.9884e-05	0.00116901	Up	2.93218
K16371	397.347	1.43867	0.364818	3.94352	8.02948e-05	0.00117172	Up	2.93118
K19157	1715.78	-1.34918	0.342425	-3.94009	8.14526e-05	0.00118197	Down	2.92739
K00886	47.3943	2.80827	0.714102	3.93259	8.40354e-05	0.00121268	Up	2.91625
K03736	224.282	1.29957	0.330681	3.92996	8.49583e-05	0.00121635	Up	2.91494
K12994	193.628	2.89871	0.737609	3.92987	8.49925e-05	0.00121635	Up	2.91494
K01061	215.183	2.61329	0.665278	3.92812	8.56122e-05	0.00122013	Up	2.91359
K02436	124.111	2.81325	0.716547	3.92611	8.6329e-05	0.00122013	Up	2.91359
K03225	50.0583	2.278	0.580139	3.92665	8.61364e-05	0.00122013	Up	2.91359
K03591	210.677	2.12351	0.540847	3.92626	8.62781e-05	0.00122013	Up	2.91359
K06726	223.119	1.31605	0.335339	3.92453	8.69007e-05	0.00122013	Up	2.91359
K10563	656.129	1.05904	0.270034	3.92189	8.78563e-05	0.00122886	Up	2.9105
K02064	214.523	2.2088	0.563891	3.91707	8.9631e-05	0.00123839	Up	2.90714
K18446	259.651	1.71928	0.438862	3.91759	8.94397e-05	0.00123839	Up	2.90714
K09921	184.485	2.03958	0.520915	3.91539	9.02596e-05	0.00124376	Up	2.90526
K05984	128.645	2.48874	0.636609	3.90937	9.25365e-05	0.00126316	Up	2.89854
K12149	57.2418	2.607	0.666981	3.90866	9.28109e-05	0.00126316	Up	2.89854
K16839	88.7282	3.17318	0.811873	3.90847	9.28828e-05	0.00126316	Up	2.89854
K00835	191.72	2.25759	0.57838	3.9033	9.48898e-05	0.00128708	Up	2.89039
K07336	86.5532	2.78138	0.712951	3.90122	9.57073e-05	0.00129479	Up	2.8878
K01011	601.948	1.68475	0.432739	3.89323	9.89179e-05	0.00131427	Up	2.88132
K02446	611.481	1.11656	0.286706	3.89446	9.84181e-05	0.00131427	Up	2.88132
K04753	471.614	2.26825	0.582306	3.89529	9.80833e-05	0.00131427	Up	2.88132
K11746	137.676	1.6417	0.421639	3.89362	9.87598e-05	0.00131427	Up	2.88132
K17836	11975	-1.02199	0.262412	-3.89462	9.83517e-05	0.00131427	Down	2.88132
K07664	146.467	2.97054	0.76351	3.89064	9.99809e-05	0.001325	Up	2.87778
K01407	610.689	1.85083	0.47612	3.88731	0.00010136	0.00133682	Up	2.87393
K02532	1295.31	1.89747	0.488127	3.88725	0.000101387	0.00133682	Up	2.87393
K04024	202.447	1.447	0.37231	3.88653	0.000101686	0.00133737	Up	2.87375
K18326	445.029	2.61327	0.672802	3.88416	0.000102684	0.00134369	Up	2.8717
K03645	108.532	2.3441	0.603752	3.88256	0.000103364	0.00134918	Up	2.86993
K19504	237.027	1.16671	0.300801	3.87867	0.000105031	0.00135872	Up	2.86687
K07116	17.0277	-5.61874	1.4492	-3.87712	0.0001057	0.00136256	Down	2.86564
K19242	432.009	1.82784	0.471616	3.87569	0.000106323	0.0013672	Up	2.86417
K05966	260.854	2.17926	0.562528	3.87405	0.000107042	0.00137073	Up	2.86305
K06219	99.0691	2.95731	0.763403	3.87386	0.000107125	0.00137073	Up	2.86305
K09771	65.9053	2.0815	0.537454	3.87289	0.000107552	0.00137241	Up	2.86252
K12112	73.0012	2.7315	0.705384	3.87236	0.000107785	0.00137241	Up	2.86252
K20023	306.627	1.79179	0.463009	3.86989	0.000108883	0.00137963	Up	2.86024
K03683	103.519	2.33457	0.603545	3.86809	0.000109689	0.00138646	Up	2.85809
K03837	366.719	2.17567	0.56273	3.86627	0.000110514	0.00139227	Up	2.85628
K09912	56.7021	2.58361	0.668309	3.86589	0.000110685	0.00139227	Up	2.85628
K02742	84.615	2.45126	0.634632	3.86249	0.000112238	0.00140777	Up	2.85147
K03607	114.956	2.42465	0.628081	3.86041	0.000113198	0.00140777	Up	2.85147
K07689	126.572	1.89647	0.491355	3.85966	0.000113543	0.00140777	Up	2.85147
K09895	75.4301	2.94077	0.761883	3.85987	0.000113446	0.00140777	Up	2.85147
K11744	391.336	2.21068	0.572608	3.86072	0.000113055	0.00140777	Up	2.85147
K00989	690.485	1.25944	0.326875	3.85296	0.000116698	0.00143533	Up	2.84305
K07274	254.175	1.84216	0.478794	3.8475	0.000119327	0.00146111	Up	2.83532
K12963	54.6675	2.45091	0.637196	3.84639	0.000119869	0.00146178	Up	2.83512
K02298	114.442	2.3545	0.612362	3.84495	0.000120577	0.00146697	Up	2.83358
K05997	117.756	1.76431	0.458997	3.84385	0.00012112	0.00147014	Up	2.83264
K02521	395.717	1.76197	0.459275	3.8364	0.00012485	0.00150836	Up	2.8215
K11904	1395.43	1.49124	0.389291	3.83065	0.000127804	0.00153335	Up	2.81436
K06163	286.415	1.52482	0.398272	3.82858	0.000128886	0.00154049	Up	2.81234
K06605	287.184	2.15728	0.563497	3.82838	0.000128992	0.00154049	Up	2.81234
K03586	61.1396	2.42212	0.633324	3.82446	0.00013106	0.0015616	Up	2.80643
K06916	306.312	2.55376	0.667901	3.82356	0.00013154	0.00156373	Up	2.80584
K15376	17.1264	2.48818	0.650947	3.8224	0.000132158	0.00156749	Up	2.80479
K03184	300.194	2.27826	0.596904	3.8168	0.000135191	0.00158896	Up	2.79889
K05952	18.6153	2.95979	0.775615	3.81606	0.000135601	0.00159017	Up	2.79856
K03712	59.9638	2.75344	0.722357	3.81175	0.000137987	0.00161408	Up	2.79208
K03825	111.222	1.9766	0.518621	3.81126	0.000138261	0.00161408	Up	2.79208
K00228	632.74	1.34287	0.352573	3.80877	0.000139657	0.00162673	Up	2.78869
K17473	82.566	2.70084	0.709518	3.80659	0.000140899	0.00163751	Up	2.78582
K05580	140.244	2.2606	0.594016	3.80562	0.000141448	0.00163998	Up	2.78516
K13895	204.552	1.70861	0.44903	3.80511	0.000141742	0.00163998	Up	2.78516
K07136	45.2146	2.76416	0.726729	3.80357	0.000142626	0.00164654	Up	2.78343
K03764	61.3508	2.36433	0.622601	3.7975	0.000146165	0.00166885	Up	2.77758
K03974	143.455	2.61992	0.689827	3.79794	0.000145904	0.00166885	Up	2.77758
K06999	308.742	1.76644	0.465056	3.79834	0.000145668	0.00166885	Up	2.77758
K13527	105.81	2.85579	0.751841	3.7984	0.000145633	0.00166885	Up	2.77758
K18588	72.9366	2.55265	0.67201	3.79852	0.00014556	0.00166885	Up	2.77758
K13639	103.07	2.7341	0.720238	3.7961	0.000146991	0.00167094	Up	2.77704
K08475	122.038	3.42893	0.904819	3.78963	0.00015087	0.00170794	Up	2.76753
K00483	348.918	1.23719	0.326697	3.78695	0.000152506	0.00171858	Up	2.76483
K09932	45.7423	2.94581	0.778028	3.78625	0.000152935	0.0017197	Up	2.76455
K01708	205.964	1.6095	0.425528	3.78235	0.000155354	0.00174312	Up	2.75867
K15833	75.1424	2.43802	0.645246	3.77843	0.000157821	0.00176698	Up	2.75277
K10016	233.565	1.58328	0.419189	3.77701	0.000158724	0.00177327	Up	2.75123
K02560	144.76	2.30321	0.609991	3.77581	0.000159487	0.00177797	Up	2.75008
K19333	204.605	1.55569	0.412177	3.77434	0.000160433	0.00178468	Up	2.74844
K03599	98.5585	2.52342	0.668889	3.77256	0.000161584	0.00179365	Up	2.74626
K09009	41.9559	2.68859	0.713226	3.76963	0.000163492	0.00180496	Up	2.74353
K05813	846.052	1.4471	0.384155	3.76697	0.000165239	0.00181484	Up	2.74116
K00020	1079.44	1.17685	0.31265	3.76413	0.00016713	0.00182892	Up	2.73781
K02297	176.927	2.58874	0.68786	3.76346	0.000167578	0.00182892	Up	2.73781
K03179	506.823	1.39791	0.371437	3.76351	0.000167547	0.00182892	Up	2.73781
K00631	317.172	1.80852	0.480917	3.76057	0.000169526	0.00183095	Up	2.73732
K07659	232.929	2.20175	0.585356	3.76139	0.000168974	0.00183095	Up	2.73732
K09897	61.2851	2.37649	0.631748	3.76177	0.000168713	0.00183095	Up	2.73732
K16013	202.861	2.31925	0.616727	3.76058	0.000169519	0.00183095	Up	2.73732
K01782	147.615	1.85982	0.494957	3.75753	0.0001716	0.00184951	Up	2.73294
K01426	485.976	1.30924	0.348805	3.75351	0.000174379	0.00186935	Up	2.72831
K01497	88.8817	2.33491	0.622148	3.75299	0.000174741	0.00186935	Up	2.72831
K02466	119.487	1.80789	0.482016	3.75067	0.00017636	0.00186935	Up	2.72831
K03557	40.2637	2.13703	0.569837	3.75024	0.000176663	0.00186935	Up	2.72831
K06143	518.643	1.43205	0.381592	3.75284	0.000174845	0.00186935	Up	2.72831
K06948	844.137	-2.06898	0.551772	-3.74971	0.00017704	0.00186935	Down	2.72831
K07711	276.786	2.41703	0.64436	3.75105	0.000176093	0.00186935	Up	2.72831
K09894	95.9053	2.42729	0.647293	3.74991	0.000176897	0.00186935	Up	2.72831
K09907	61.3937	2.42238	0.645619	3.75203	0.000175409	0.00186935	Up	2.72831
K03674	36.0495	2.35253	0.627493	3.7491	0.000177469	0.00187008	Up	2.72814
K00685	26.8804	4.37207	1.16926	3.73917	0.000184632	0.00191833	Up	2.71708
K04091	187.335	2.59278	0.69337	3.73939	0.000184466	0.00191833	Up	2.71708
K06077	72.4314	1.76045	0.47156	3.73325	0.000189023	0.00195223	Up	2.70947
K03805	166.7	2.12364	0.569101	3.73158	0.000190284	0.00195936	Up	2.70789
K07261	114.565	2.19008	0.587014	3.73088	0.000190814	0.00195936	Up	2.70789
K07054	195.403	1.69697	0.455073	3.72901	0.000192235	0.00196974	Up	2.70559
K09937	34.0584	2.29493	0.615605	3.72792	0.000193066	0.00197414	Up	2.70462
K11736	58.4362	1.99036	0.534522	3.72363	0.000196379	0.00199912	Up	2.69916
K12145	96.2357	2.32339	0.624016	3.72329	0.000196641	0.00199912	Up	2.69916
K09802	68.3885	1.62479	0.438097	3.70875	0.000208285	0.00210105	Up	2.67756
K15723	105.742	2.65496	0.717131	3.70221	0.000213734	0.00214353	Up	2.66887
K03788	143.912	2.31419	0.625257	3.70119	0.000214592	0.00214799	Up	2.66797
K12854	5.84549	5.88049	1.59047	3.69734	0.000217874	0.00217664	Up	2.66221
K11107	23.8788	2.3048	0.623677	3.69551	0.000219445	0.00218394	Up	2.66076
K01975	136.784	1.63292	0.44213	3.69331	0.000221358	0.00219457	Up	2.65865
K01058	276.985	1.41891	0.384428	3.69096	0.000223412	0.00220948	Up	2.65571
K08308	16.3616	3.91234	1.06008	3.69061	0.000223713	0.00220948	Up	2.65571
K02196	22.2171	2.47714	0.671605	3.68838	0.000225682	0.0022179	Up	2.65406
K03468	365.855	2.3171	0.628248	3.6882	0.000225846	0.0022179	Up	2.65406
K18851	103.456	-2.15696	0.584747	-3.68871	0.000225396	0.0022179	Down	2.65406
K07787	999.635	1.42608	0.386764	3.68721	0.000226728	0.00222237	Up	2.65318
K03632	344.736	1.78832	0.485328	3.68476	0.000228914	0.00223536	Up	2.65065
K03638	97.009	1.84203	0.500107	3.68327	0.000230258	0.00224327	Up	2.64912
K03633	164.806	2.28433	0.620534	3.68123	0.000232112	0.00224548	Up	2.64869
K11925	263.347	2.0401	0.554066	3.68205	0.00023137	0.00224548	Up	2.64869
K06884	31.8125	2.49772	0.678617	3.6806	0.000232686	0.00224685	Up	2.64843
K00673	292.383	1.96544	0.534902	3.67439	0.000238421	0.00228946	Up	2.64027
K03690	140.829	2.47249	0.673429	3.67149	0.000241141	0.0023062	Up	2.6371
K19776	125.896	2.43485	0.66333	3.67064	0.00024194	0.0023062	Up	2.6371
K04027	348.856	1.0994	0.299644	3.66904	0.000243463	0.00231223	Up	2.63597
K11531	93.5889	3.44175	0.937976	3.66934	0.000243177	0.00231223	Up	2.63597
K03399	15.997	4.16966	1.13674	3.66808	0.000244377	0.00231471	Up	2.6355
K07810	67.2264	2.5129	0.68512	3.66783	0.000244616	0.00231471	Up	2.6355
K18297	36.7624	3.47777	0.94931	3.66347	0.000248819	0.0023502	Up	2.62889
K16137	393.031	1.55894	0.425732	3.66179	0.000250459	0.00235713	Up	2.62762
K13727	78.4871	3.15579	0.862264	3.65989	0.000252323	0.00237038	Up	2.62518
K02462	142.451	2.15082	0.588018	3.65775	0.000254438	0.00238313	Up	2.62285
K16291	753.415	1.76571	0.482752	3.65759	0.000254598	0.00238313	Up	2.62285
K16301	157.041	2.1945	0.600253	3.65596	0.000256226	0.00239405	Up	2.62087
K00256	68.4162	2.09388	0.573613	3.65034	0.000261892	0.00243021	Up	2.61436
K00523	353.552	1.67822	0.460079	3.64767	0.000264625	0.00244304	Up	2.61207
K09794	5.98726	2.3174	0.635333	3.64754	0.000264761	0.00244304	Up	2.61207
K07358	98.915	2.81022	0.770607	3.64676	0.000265567	0.00244614	Up	2.61152
K16028	92.8862	2.76339	0.758254	3.64441	0.000268002	0.00245838	Up	2.60935
K02798	1395.3	1.23352	0.3386	3.643	0.000269481	0.00246471	Up	2.60823
K00484	149.955	2.41975	0.664355	3.64226	0.000270254	0.00246743	Up	2.60775
K03182	1108.33	1.0522	0.289073	3.63992	0.000272721	0.00248124	Up	2.60533
K05845	437.792	1.57369	0.43277	3.63631	0.000276568	0.00250745	Up	2.60077
K18827	18.9672	3.31267	0.911933	3.63258	0.000280605	0.00253617	Up	2.59582
K09917	15.2905	2.52124	0.694235	3.63168	0.000281585	0.00253964	Up	2.59523
K09767	226.698	1.00401	0.276515	3.63093	0.000282398	0.00254256	Up	2.59473
K11530	46.1246	1.89521	0.522154	3.62959	0.00028387	0.00255139	Up	2.59322
K00135	1055.5	1.47949	0.408059	3.62568	0.000288201	0.00256656	Up	2.59065
K01816	194.986	1.36988	0.377786	3.62606	0.00028778	0.00256656	Up	2.59065
K03291	353.924	2.02653	0.559118	3.62452	0.000289501	0.00256656	Up	2.59065
K05916	295.561	1.43152	0.394936	3.6247	0.000289298	0.00256656	Up	2.59065
K09798	413.933	1.13751	0.313796	3.625	0.000288963	0.00256656	Up	2.59065
K17247	107.565	2.61751	0.722748	3.62161	0.000292779	0.00258232	Up	2.58799
K08092	407.706	1.29399	0.35735	3.62107	0.000293387	0.0025833	Up	2.58783
K09910	89.4608	2.19061	0.6056	3.61726	0.000297741	0.00261278	Up	2.5829
K01176	15783.2	-1.09558	0.302987	-3.61594	0.000299255	0.00261282	Down	2.58289
K05811	40.4372	2.7658	0.764829	3.61623	0.000298927	0.00261282	Up	2.58289
K11941	163.938	2.31113	0.63979	3.61232	0.000303468	0.00263632	Up	2.579
K05816	130.79	2.65664	0.735649	3.61129	0.000304679	0.00263833	Up	2.57867
K06159	323.652	1.38123	0.382655	3.6096	0.000306669	0.00264709	Up	2.57723
K10748	124.643	2.78252	0.770972	3.6091	0.000307256	0.00264709	Up	2.57723
K00109	224.731	1.49445	0.414231	3.60778	0.000308828	0.00265623	Up	2.57573
K09927	207.55	2.33043	0.646272	3.60597	0.000310993	0.00267042	Up	2.57342
K13288	308.353	1.54917	0.429946	3.60318	0.000314344	0.00269474	Up	2.56948
K07662	128.277	2.4685	0.685572	3.60065	0.000317426	0.00271668	Up	2.56596
K16077	433.711	2.85916	0.794278	3.5997	0.000318587	0.00272214	Up	2.56509
K12266	304.275	2.97868	0.827882	3.59796	0.000320727	0.00273373	Up	2.56324
K05798	273.714	2.40441	0.668548	3.59646	0.000322575	0.00274226	Up	2.56189
K02839	100.795	1.84283	0.512617	3.59495	0.000324457	0.00274968	Up	2.56072
K18923	16.814	3.06711	0.853502	3.59355	0.000326199	0.00275994	Up	2.5591
K17938	160.192	2.54665	0.708911	3.59234	0.000327725	0.00276385	Up	2.55849
K03214	101.069	2.16419	0.603116	3.58834	0.000332791	0.00279749	Up	2.55323
K13938	103.551	2.75208	0.767145	3.58743	0.000333952	0.00280271	Up	2.55242
K03603	122.062	1.62611	0.45334	3.58696	0.000334558	0.00280327	Up	2.55233
K06191	72.9461	1.9997	0.557633	3.58605	0.000335723	0.00280851	Up	2.55152
K10555	247.408	1.7079	0.47641	3.58494	0.000337157	0.00281145	Up	2.55107
K07677	494.435	1.34852	0.37665	3.58031	0.000343192	0.00283898	Up	2.54684
K07340	97.0386	1.79224	0.501155	3.57623	0.00034859	0.00287449	Up	2.54144
K06968	164.801	1.78003	0.497952	3.57471	0.000350613	0.00288202	Up	2.5403
K07222	136.191	3.54296	0.991492	3.57336	0.000352432	0.00288783	Up	2.53943
K03726	235.86	-3.67442	1.02877	-3.57167	0.00035471	0.00290192	Down	2.53731
K05779	112.161	2.22792	0.623959	3.57063	0.000356128	0.00290894	Up	2.53627
K09901	44.7579	2.35108	0.658791	3.56878	0.000358653	0.00292497	Up	2.53388
K06211	341.622	1.60776	0.450918	3.56552	0.000363138	0.00295571	Up	2.52934
K06078	26.4053	2.63149	0.738487	3.56336	0.000366141	0.00296278	Up	2.5283
K07688	21.5511	3.15546	0.887054	3.55723	0.000374786	0.00302372	Up	2.51946
K11935	457.073	1.72361	0.484542	3.55719	0.000374837	0.00302372	Up	2.51946
K07275	138.876	1.59158	0.447711	3.55492	0.0003781	0.00303591	Up	2.51771
K04770	381.949	1.54562	0.434895	3.55402	0.000379391	0.00304149	Up	2.51691
K08992	38.6761	2.23286	0.628333	3.55362	0.000379967	0.00304149	Up	2.51691
K05522	143.982	2.39658	0.674604	3.55257	0.000381489	0.00304898	Up	2.51585
K00389	82.5021	2.1432	0.603574	3.55086	0.000383978	0.0030579	Up	2.51458
K03079	400.747	1.59366	0.448845	3.55059	0.000384372	0.0030579	Up	2.51458
K07685	56.7045	3.70946	1.04457	3.55117	0.000383528	0.0030579	Up	2.51458
K07589	54.5831	2.60953	0.735402	3.54844	0.000387513	0.00307818	Up	2.51171
K14064	42.9375	2.77972	0.783739	3.54674	0.000390027	0.00309342	Up	2.50956
K05988	3408.62	-1.465	0.413174	-3.54571	0.000391558	0.00310083	Down	2.50852
K02507	226.333	1.91856	0.541171	3.54521	0.000392299	0.00310197	Up	2.50836
K03774	66.7745	2.4164	0.681928	3.54349	0.000394873	0.00311758	Up	2.50618
K06193	92.5102	1.81132	0.511428	3.5417	0.000397564	0.00311986	Up	2.50586
K16074	133.695	1.81639	0.512692	3.54285	0.000395828	0.00311986	Up	2.50586
K07740	91.2826	2.31302	0.653624	3.53876	0.000402019	0.00315006	Up	2.50168
K02618	219.229	2.34052	0.661868	3.53623	0.000405879	0.00317074	Up	2.49884
K09880	79.6983	2.86148	0.809166	3.53634	0.000405713	0.00317074	Up	2.49884
K05712	305.801	1.76943	0.500846	3.53288	0.000411066	0.00319684	Up	2.49528
K08310	74.5634	1.67064	0.472874	3.53296	0.000410939	0.00319684	Up	2.49528
K15737	184.612	2.08382	0.589972	3.53207	0.000412318	0.00320178	Up	2.49461
K02451	67.8919	2.95092	0.83595	3.53002	0.000415523	0.00321227	Up	2.49319
K03568	3083.06	1.39545	0.395458	3.5287	0.000417613	0.0032156	Up	2.49274
K13633	229.527	2.47405	0.701063	3.529	0.000417135	0.0032156	Up	2.49274
K07675	238.184	1.68177	0.477115	3.52488	0.000423672	0.00324627	Up	2.48861
K06176	311.346	1.34965	0.383164	3.52238	0.000427686	0.00326323	Up	2.48635
K18140	128.332	2.57352	0.73071	3.52194	0.000428397	0.00326323	Up	2.48635
K18325	28.8614	3.14503	0.89294	3.52211	0.000428127	0.00326323	Up	2.48635
K06164	250.13	1.45151	0.412731	3.51685	0.000436707	0.00332166	Up	2.47864
K03769	5137.81	-1.04957	0.298561	-3.51544	0.000439019	0.00333437	Down	2.47699
K03185	157.848	2.5665	0.731107	3.51043	0.000447378	0.00337319	Up	2.47196
K08714	20.084	-5.63417	1.60543	-3.50945	0.000449031	0.00337585	Down	2.47162
K02452	121.902	2.01666	0.57483	3.50827	0.000451034	0.00338113	Up	2.47094
K07235	76.4682	2.19881	0.628404	3.49904	0.000466933	0.00347524	Up	2.45902
K19002	1090.67	-1.41043	0.403086	-3.49909	0.000466857	0.00347524	Down	2.45902
K03554	197.639	1.62094	0.463385	3.49803	0.000468709	0.00348346	Up	2.45799
K00034	657.089	1.40884	0.403087	3.49514	0.000473813	0.00351637	Up	2.45391
K09786	186.496	2.17831	0.623374	3.49439	0.000475142	0.0035212	Up	2.45331
K05365	398.003	1.92187	0.550092	3.49372	0.000476339	0.00352505	Up	2.45283
K05847	558.383	1.1969	0.342803	3.49152	0.000480285	0.00354919	Up	2.44987
K01576	20.3769	3.75242	1.07485	3.49111	0.000481021	0.00354958	Up	2.44982
K03807	147.654	2.55705	0.73284	3.48923	0.000484414	0.00356955	Up	2.44739
K00455	136.102	1.95204	0.55965	3.48796	0.000486719	0.00357639	Up	2.44656
K02686	79.8001	1.56529	0.448824	3.48753	0.000487512	0.00357715	Up	2.44646
K07273	10965.3	-1.22033	0.351124	-3.4755	0.000509902	0.00371	Down	2.43063
K01419	248.902	1.22046	0.35124	3.47472	0.00051138	0.00371555	Up	2.42998
K04092	57.8936	2.55574	0.735975	3.47259	0.000515458	0.00373081	Up	2.4282
K15549	164.02	2.41609	0.696225	3.47028	0.000519925	0.0037514	Up	2.42581
K03670	472.019	2.10515	0.607696	3.46414	0.000531922	0.00380624	Up	2.4195
K03919	106.74	2.50594	0.723337	3.46442	0.000531381	0.00380624	Up	2.4195
K07184	64.3649	2.30276	0.664598	3.46489	0.000530455	0.00380624	Up	2.4195
K09918	40.8948	2.74212	0.791528	3.46433	0.000531552	0.00380624	Up	2.4195
K03119	173.608	1.80455	0.521566	3.45986	0.000540449	0.00384926	Up	2.41462
K07160	438.446	1.08587	0.313901	3.45927	0.000541638	0.00384926	Up	2.41462
K08311	128.728	1.75223	0.506514	3.4594	0.00054138	0.00384926	Up	2.41462
K12147	32.8447	2.69424	0.778647	3.46015	0.000539872	0.00384926	Up	2.41462
K03164	7.29146	-7.29993	2.11252	-3.45556	0.000549152	0.00389201	Down	2.40983
K07245	141.156	2.83242	0.819655	3.45563	0.000549013	0.00389201	Up	2.40983
K07140	193.596	2.45578	0.711073	3.45363	0.000553101	0.00390933	Up	2.4079
K18765	511.411	1.69109	0.489884	3.45203	0.000556377	0.00392715	Up	2.40592
K00360	34.2718	2.48576	0.720259	3.45121	0.000558089	0.00392855	Up	2.40577
K05846	278.124	2.0033	0.580462	3.45121	0.000558081	0.00392855	Up	2.40577
K06151	129.475	1.73101	0.50195	3.44856	0.00056358	0.00395481	Up	2.40287
K01720	99.8072	2.10344	0.610249	3.44685	0.000567171	0.00396562	Up	2.40169
K03840	105.528	2.12244	0.615933	3.44589	0.000569173	0.00397426	Up	2.40074
K09823	116.321	2.44376	0.709591	3.44391	0.000573372	0.00399821	Up	2.39813
K02806	248.313	1.39474	0.405619	3.43855	0.000584834	0.00405234	Up	2.39229
K07071	578.708	1.28072	0.372468	3.43846	0.000585035	0.00405234	Up	2.39229
K10124	486.92	1.80098	0.524023	3.43683	0.000588566	0.00406007	Up	2.39147
K14392	613.514	1.42192	0.413682	3.43724	0.000587683	0.00406007	Up	2.39147
K18918	52.137	1.56276	0.454743	3.43657	0.000589124	0.00406007	Up	2.39147
K09914	86.3322	2.51719	0.732935	3.43439	0.000593881	0.00407557	Up	2.38981
K09973	1621.18	-1.40306	0.408519	-3.43451	0.000593629	0.00407557	Down	2.38981
K19778	77.575	2.55568	0.744084	3.43466	0.000593296	0.00407557	Up	2.38981
K11294	33.6896	-2.44449	0.711942	-3.43355	0.000595728	0.00408286	Down	2.38904
K12142	509.101	1.30059	0.378994	3.4317	0.000599808	0.0041	Up	2.38722
K05550	20.3466	3.79864	1.10862	3.42648	0.000611469	0.00417422	Up	2.37942
K01031	83.08	2.9247	0.854262	3.42366	0.000617836	0.00420663	Up	2.37607
K07234	14.121	2.46052	0.718908	3.42258	0.000620302	0.00421789	Up	2.3749
K18305	15.986	4.97244	1.45338	3.4213	0.000623234	0.00423229	Up	2.37342
K09906	62.131	2.20768	0.645596	3.41961	0.000627119	0.00424757	Up	2.37186
K02300	58.8217	2.26455	0.662477	3.41831	0.000630114	0.0042623	Up	2.37036
K09607	8976.59	-2.16713	0.634806	-3.41385	0.000640525	0.00431586	Down	2.36493
K06149	218.966	1.27139	0.37291	3.40938	0.000651116	0.00438154	Up	2.35837
K09920	83.1483	2.43614	0.714666	3.40877	0.000652553	0.00438553	Up	2.35798
K00427	520.928	1.30473	0.382889	3.40758	0.000655413	0.00439906	Up	2.35664
K14591	223.368	1.27323	0.373741	3.40672	0.000657485	0.00440727	Up	2.35583
K01521	138.229	2.37437	0.697113	3.40601	0.000659198	0.00440802	Up	2.35576
K00123	2965.85	1.02245	0.300376	3.40389	0.000664329	0.00441699	Up	2.35487
K07400	170.823	1.57402	0.462314	3.40465	0.000662479	0.00441699	Up	2.35487
K07796	667.567	1.6271	0.478044	3.40366	0.000664887	0.00441699	Up	2.35487
K08082	154.205	2.08354	0.612101	3.40391	0.000664293	0.00441699	Up	2.35487
K00231	179.716	1.63026	0.47908	3.40291	0.000666727	0.00441791	Up	2.35478
K00448	32.9822	3.78803	1.11462	3.3985	0.000677577	0.00447338	Up	2.34936
K02679	64.7149	2.79091	0.821313	3.39811	0.000678542	0.00447338	Up	2.34936
K07280	32.3205	2.70455	0.796343	3.39621	0.000683257	0.00448757	Up	2.34799
K12137	697.895	1.27369	0.375018	3.39633	0.00068295	0.00448757	Up	2.34799
K02624	214.601	1.58938	0.46833	3.39373	0.000689474	0.00451771	Up	2.34508
K00363	44.3808	2.38424	0.703013	3.39146	0.00069521	0.0045389	Up	2.34305
K01963	284.717	1.50987	0.44521	3.39136	0.000695469	0.0045389	Up	2.34305
K06145	455.628	1.81479	0.53547	3.38916	0.000701077	0.00456403	Up	2.34065
K06203	154.064	1.67901	0.495513	3.38843	0.000702933	0.00456467	Up	2.34059
K06917	222.321	2.03163	0.600138	3.38527	0.000711085	0.0046069	Up	2.33659
K18920	24.1419	2.12608	0.628047	3.38522	0.00071121	0.0046069	Up	2.33659
K00247	74.6752	1.60208	0.474123	3.37904	0.000727382	0.0046941	Up	2.32845
K02496	193.658	1.33816	0.396161	3.37781	0.000730645	0.004701	Up	2.32781
K09904	17.6438	2.03003	0.601017	3.37766	0.000731045	0.004701	Up	2.32781
K13598	231.302	1.92975	0.571336	3.37762	0.000731165	0.004701	Up	2.32781
K01684	1245.54	1.05643	0.31318	3.37325	0.000742869	0.00476274	Up	2.32214
K01032	97.7351	2.91675	0.864966	3.3721	0.000745975	0.00477258	Up	2.32125
K13940	52.1045	2.30735	0.685255	3.36714	0.000759534	0.0048178	Up	2.31715
K07237	37.6583	2.32809	0.692123	3.3637	0.000769057	0.0048604	Up	2.31333
K06137	61.5212	3.48779	1.0385	3.35848	0.000783717	0.00490531	Up	2.30933
K06866	52.4637	2.19972	0.654945	3.35863	0.000783303	0.00490531	Up	2.30933
K11920	91.6831	2.52858	0.752803	3.35889	0.000782563	0.00490531	Up	2.30933
K12289	97.215	2.51411	0.748375	3.35942	0.000781062	0.00490531	Up	2.30933
K12582	255.25	2.029	0.60392	3.35973	0.000780199	0.00490531	Up	2.30933
K07344	197.575	2.74063	0.816341	3.35721	0.00078733	0.00491246	Up	2.3087
K11940	37.1435	2.368	0.705444	3.35675	0.000788642	0.00491246	Up	2.3087
K00477	31.0669	4.1584	1.24005	3.3534	0.000798252	0.00496345	Up	2.30422
K04750	90.674	2.35521	0.702371	3.35323	0.000798739	0.00496345	Up	2.30422
K03804	106.726	2.20799	0.658582	3.35264	0.000800435	0.00496802	Up	2.30382
K05812	80.7351	2.44223	0.728519	3.35232	0.000801387	0.00496802	Up	2.30382
K07470	55.1424	2.1942	0.654736	3.35128	0.00080438	0.00498064	Up	2.30272
K01905	299.974	1.69517	0.506182	3.34893	0.000811236	0.00499333	Up	2.30161
K02063	491.464	1.34611	0.401844	3.34984	0.000808597	0.00499333	Up	2.30161
K07781	106.306	2.53049	0.755504	3.34941	0.000809842	0.00499333	Up	2.30161
K00108	142.601	2.07535	0.620396	3.3452	0.000822227	0.00501936	Up	2.29935
K00782	2789.82	-1.04235	0.311585	-3.34532	0.000821869	0.00501936	Down	2.29935
K02461	255.36	1.72544	0.515779	3.34532	0.000821884	0.00501936	Up	2.29935
K09161	92.5142	2.08424	0.622784	3.34665	0.000817946	0.00501936	Up	2.29935
K15547	289.921	2.13174	0.637842	3.34212	0.000831421	0.00506358	Up	2.29554
K18829	80.0969	1.55216	0.464783	3.33953	0.000839205	0.0051009	Up	2.29235
K15735	139.65	1.68611	0.50516	3.33777	0.000844545	0.00512548	Up	2.29027
K02611	96.745	2.37076	0.710626	3.33615	0.00084946	0.00514329	Up	2.28876
K05523	26.2948	2.81084	0.842833	3.33499	0.000853028	0.00515288	Up	2.28795
K15984	264.969	1.30873	0.392404	3.33517	0.000852477	0.00515288	Up	2.28795
K07241	132.913	3.08531	0.925402	3.33402	0.000855993	0.00516479	Up	2.28695
K02625	171.4	2.26585	0.679816	3.33303	0.000859062	0.0051713	Up	2.2864
K00324	386.239	1.42196	0.426701	3.33244	0.000860869	0.0051759	Up	2.28601
K02192	30.8425	1.63881	0.492372	3.3284	0.000873465	0.00523978	Up	2.28069
K01210	289.687	1.41428	0.424971	3.32795	0.000874868	0.00524215	Up	2.28049
K01669	203.006	2.23819	0.672759	3.32689	0.000878224	0.00525014	Up	2.27983
K00867	100.442	1.85468	0.558199	3.32261	0.000891787	0.00531898	Up	2.27417
K03528	351.376	1.63999	0.493797	3.32119	0.000896353	0.00533093	Up	2.2732
K08306	192.031	1.49328	0.449643	3.32103	0.000896868	0.00533093	Up	2.2732
K07318	406.389	-2.13976	0.645431	-3.31523	0.000915668	0.00543025	Down	2.26518
K02465	40.0213	3.36775	1.01657	3.31285	0.000923492	0.00546004	Up	2.2628
K16925	276.77	1.64707	0.497393	3.3114	0.000928291	0.00548008	Up	2.26121
K04064	46.1497	2.43347	0.735599	3.30814	0.000939168	0.00552546	Up	2.25763
K15545	144.51	2.24188	0.678213	3.30557	0.00094785	0.00557023	Up	2.25413
K02457	94.9306	2.10803	0.638281	3.30267	0.000957684	0.00560699	Up	2.25127
K15034	61.6291	2.10633	0.637953	3.3017	0.000960998	0.00561573	Up	2.25059
K01194	812.398	1.50459	0.455853	3.30061	0.000964753	0.00563134	Up	2.24939
K12151	31.1571	2.35079	0.71237	3.29995	0.000967012	0.00563819	Up	2.24886
K03749	120.089	2.30503	0.698714	3.29896	0.00097044	0.0056455	Up	2.2483
K09791	47.9311	1.55144	0.470381	3.29826	0.000972852	0.00564689	Up	2.24819
K04065	118.062	2.18077	0.661336	3.29752	0.000975422	0.00565549	Up	2.24753
K03290	207.593	1.79301	0.543963	3.29619	0.000980051	0.00567599	Up	2.24596
K04775	124.202	2.47322	0.751313	3.29186	0.000995283	0.00575139	Up	2.24023
K05549	34.5383	2.66287	0.809379	3.29002	0.0010018	0.00577618	Up	2.23836
K04019	244.012	1.11276	0.33833	3.28897	0.00100553	0.00579127	Up	2.23723
K03181	110.821	2.40593	0.73178	3.28777	0.00100984	0.00579681	Up	2.23681
K05517	145.816	1.84387	0.560906	3.28731	0.0010115	0.00579997	Up	2.23657
K07008	140.327	1.84594	0.561637	3.2867	0.00101368	0.005806	Up	2.23612
K08315	92.3969	1.9252	0.586618	3.28187	0.00103122	0.00589351	Up	2.22963
K06971	175.88	1.14609	0.349537	3.27888	0.00104218	0.00593259	Up	2.22676
K08970	262.094	2.18739	0.667138	3.27876	0.00104263	0.00593259	Up	2.22676
K19163	41.2182	2.73877	0.835388	3.27843	0.00104385	0.00593302	Up	2.22672
K02745	424.362	1.1744	0.358298	3.27773	0.00104645	0.00594133	Up	2.22612
K03567	148.32	1.42401	0.435075	3.27302	0.00106405	0.00602149	Up	2.2203
K11748	99.8252	1.94898	0.595724	3.27161	0.00106937	0.00604503	Up	2.2186
K07147	189.887	2.15528	0.659209	3.26949	0.0010774	0.0060838	Up	2.21583
K00713	410.722	-1.6548	0.506258	-3.26869	0.00108045	0.0060944	Down	2.21507
K07283	104.224	2.14478	0.656292	3.26803	0.00108297	0.00609539	Up	2.215
K07233	48.8565	3.33222	1.02044	3.26547	0.00109283	0.00613651	Up	2.21208
K09933	133.004	1.71202	0.525214	3.25966	0.00111546	0.00623766	Up	2.20498
K07113	90.753	2.3999	0.736843	3.257	0.00112597	0.00628293	Up	2.20184
K07649	10.8726	3.53723	1.08733	3.25314	0.00114138	0.00634848	Up	2.19733
K08167	227.72	1.63509	0.502609	3.2532	0.00114113	0.00634848	Up	2.19733
K08305	281.228	1.36069	0.41831	3.25283	0.00114261	0.00634852	Up	2.19733
K19113	59.6318	2.08854	0.643171	3.24726	0.00116524	0.00646731	Up	2.18928
K02170	193.797	1.68133	0.518005	3.24579	0.00117127	0.00648001	Up	2.18842
K18657	87.9996	2.44801	0.754156	3.24603	0.00117026	0.00648001	Up	2.18842
K01085	574.334	1.40479	0.43315	3.24319	0.00118198	0.00652538	Up	2.18539
K02533	363.188	1.38778	0.428149	3.24135	0.00118966	0.00655269	Up	2.18358
K13663	2236.16	-1.5949	0.49229	-3.23975	0.00119636	0.00656686	Down	2.18264
K02472	2430.76	-1.34569	0.415486	-3.23884	0.00120018	0.00657694	Down	2.18198
K04333	120.539	2.02386	0.624938	3.23849	0.00120162	0.0065779	Up	2.18191
K10421	12.2866	3.35951	1.03895	3.23358	0.00122251	0.00667816	Up	2.17534
K01216	2141.42	-1.41645	0.438165	-3.23268	0.00122636	0.00669215	Down	2.17443
K03971	20.8177	2.58301	0.801432	3.223	0.00126856	0.00686364	Up	2.16345
K11179	41.2431	1.54775	0.480257	3.22275	0.00126968	0.00686364	Up	2.16345
K18093	204.133	2.07546	0.644586	3.21983	0.00128267	0.00692669	Up	2.15947
K00015	515.808	1.21547	0.377803	3.21721	0.00129443	0.00697667	Up	2.15635
K02562	129.93	2.22873	0.693059	3.21579	0.00130088	0.00697667	Up	2.15635
K06900	43.7675	-2.7799	0.864246	-3.21656	0.00129737	0.00697667	Down	2.15635
K19688	59.2677	2.5723	0.799923	3.21569	0.00130133	0.00697667	Up	2.15635
K13301	99.4746	2.37414	0.739122	3.21211	0.00131766	0.00705694	Up	2.15138
K00883	384.35	1.29044	0.401831	3.2114	0.00132092	0.00706711	Up	2.15076
K01728	3956.2	-1.61784	0.503893	-3.21067	0.00132424	0.00707031	Down	2.15056
K03280	4.68742	3.72016	1.15862	3.21086	0.00132336	0.00707031	Up	2.15056
K01492	18.9507	-2.53346	0.789155	-3.21035	0.00132574	0.00707108	Down	2.15051
K07592	289.532	1.49889	0.46715	3.20859	0.00133387	0.00709961	Up	2.14877
K16651	308.417	1.365	0.425427	3.20856	0.00133404	0.00709961	Up	2.14877
K03187	128.945	1.28778	0.401486	3.20753	0.00133881	0.00711159	Up	2.14803
K09019	84.0271	2.40463	0.749828	3.20691	0.00134168	0.00711956	Up	2.14755
K02363	362.67	1.61267	0.503026	3.20595	0.00134619	0.0071289	Up	2.14698
K07686	90.3561	1.80107	0.56216	3.20383	0.00135611	0.00717411	Up	2.14423
K10481	24.4219	-2.85464	0.891255	-3.20295	0.00136028	0.00718886	Down	2.14334
K02460	199.948	1.7321	0.540836	3.20263	0.00136179	0.00718955	Up	2.1433
K00524	22.7304	-2.86928	0.896774	-3.19955	0.00137641	0.00723272	Down	2.1407
K05879	823.209	1.06684	0.333475	3.19915	0.00137832	0.00723272	Up	2.1407
K07724	43.1547	2.29073	0.716145	3.1987	0.0013805	0.00723682	Up	2.14045
K00285	348.504	1.22812	0.384453	3.19447	0.0014009	0.00729958	Up	2.1367
K09162	49.7207	2.66686	0.834689	3.19504	0.00139813	0.00729958	Up	2.1367
K11891	717.469	1.81185	0.567183	3.19447	0.00140086	0.00729958	Up	2.1367
K18828	247.781	1.44577	0.452668	3.19389	0.00140367	0.0073067	Up	2.13628
K15536	69.8975	2.35233	0.737157	3.19108	0.00141742	0.00736351	Up	2.13292
K07350	284.692	2.18388	0.684597	3.19003	0.00142258	0.00738291	Up	2.13177
K06144	38.5374	3.01732	0.947245	3.18536	0.00144575	0.00745421	Up	2.1276
K08073	87.0029	-4.51713	1.41778	-3.18606	0.00144227	0.00745421	Down	2.1276
K09908	65.8103	2.10641	0.661158	3.18594	0.00144286	0.00745421	Up	2.1276
K10108	348.4	1.99166	0.625116	3.18606	0.00144222	0.00745421	Up	2.1276
K18299	286.222	1.66699	0.523348	3.18524	0.00144636	0.00745421	Up	2.1276
K02613	110.458	2.32196	0.729141	3.18451	0.00144997	0.0074654	Up	2.12695
K01777	123.511	1.08053	0.339343	3.18417	0.00145171	0.00746697	Up	2.12686
K09960	353.051	1.64276	0.516113	3.18296	0.00145779	0.00748404	Up	2.12586
K07637	119.775	1.76591	0.554983	3.18192	0.00146305	0.00750299	Up	2.12477
K09857	88.0939	1.63517	0.514147	3.18036	0.00147091	0.00753589	Up	2.12287
K01638	263.032	1.96971	0.619704	3.17847	0.00148055	0.00757781	Up	2.12046
K11896	475.431	1.91242	0.601766	3.17801	0.00148289	0.00758228	Up	2.1202
K07490	34.1259	2.36337	0.744036	3.17641	0.00149109	0.00760176	Up	2.11909
K01053	1649.74	1.10911	0.349242	3.17577	0.00149437	0.00760276	Up	2.11903
K03669	282.65	1.973	0.621561	3.17426	0.00150217	0.00762089	Up	2.11799
K07034	171.586	1.45826	0.459537	3.17332	0.00150707	0.00763244	Up	2.11734
K09805	118.017	-2.51408	0.793133	-3.16981	0.00152538	0.00770105	Down	2.11345
K07346	671.916	1.90475	0.601768	3.16526	0.00154945	0.00779223	Up	2.10834
K00881	30.7957	-1.6149	0.510463	-3.16361	0.00155826	0.00782142	Down	2.10671
K03190	196.046	1.23313	0.39003	3.16163	0.0015689	0.00784452	Up	2.10543
K00573	117.797	1.68889	0.535407	3.1544	0.00160826	0.00797912	Up	2.09804
K02317	128.096	2.00447	0.635455	3.15439	0.00160837	0.00797912	Up	2.09804
K02545	29.0538	-1.42004	0.45037	-3.15304	0.00161579	0.00797912	Down	2.09804
K03623	68.2783	1.2422	0.393797	3.15442	0.00160817	0.00797912	Up	2.09804
K06979	274.437	2.00796	0.636457	3.15491	0.0016055	0.00797912	Up	2.09804
K07337	99.2968	1.71501	0.543526	3.15535	0.00160308	0.00797912	Up	2.09804
K09954	35.7804	2.18966	0.694268	3.15391	0.00161097	0.00797912	Up	2.09804
K01055	290.927	1.23822	0.393307	3.14824	0.00164258	0.00808846	Up	2.09213
K05814	200.217	1.54438	0.490581	3.14806	0.0016436	0.00808846	Up	2.09213
K15366	24066.7	-1.99308	0.633292	-3.14717	0.00164859	0.00810259	Down	2.09138
K07120	238.72	1.3749	0.437197	3.1448	0.00166198	0.00816065	Up	2.08828
K14063	112.259	2.41436	0.768097	3.1433	0.00167053	0.00817953	Up	2.08727
K03809	97.9563	1.60143	0.509571	3.1427	0.00167395	0.00818848	Up	2.0868
K18922	35.936	2.47969	0.789344	3.14145	0.00168112	0.00820809	Up	2.08576
K02553	295.721	1.25875	0.400825	3.14039	0.00168723	0.00822246	Up	2.085
K07347	3635.23	1.46927	0.467846	3.14051	0.00168656	0.00822246	Up	2.085
K00073	227.919	1.47979	0.471745	3.13685	0.00170772	0.00829123	Up	2.08138
K11892	268.905	1.45973	0.465575	3.13533	0.00171663	0.0083189	Up	2.07993
K03188	197.377	1.20046	0.383357	3.13143	0.00173954	0.00839632	Up	2.07591
K12944	66.1188	2.30817	0.737043	3.13167	0.00173817	0.00839632	Up	2.07591
K14762	59.9223	2.29149	0.731816	3.13124	0.00174068	0.00839632	Up	2.07591
K02616	107.573	2.50008	0.798636	3.13044	0.00174547	0.00841162	Up	2.07512
K19429	389.229	1.93006	0.616632	3.13	0.00174806	0.00841627	Up	2.07488
K13255	106.067	2.24555	0.717879	3.12803	0.00175979	0.0084571	Up	2.07278
K00163	369.668	1.51544	0.484827	3.12574	0.00177356	0.00851035	Up	2.07005
K03304	178.694	1.76522	0.565021	3.12416	0.00178312	0.0085451	Up	2.06828
K03478	156.953	1.48125	0.474167	3.1239	0.00178469	0.0085451	Up	2.06828
K13822	6.81183	3.16982	1.01554	3.1213	0.00180055	0.00859728	Up	2.06564
K11786	9.19891	-3.13455	1.0045	-3.12051	0.00180541	0.0086126	Down	2.06487
K02744	376.6	1.01315	0.324846	3.11886	0.00181552	0.00861889	Up	2.06455
K05780	187.543	1.37359	0.440323	3.1195	0.00181155	0.00861889	Up	2.06455
K06204	222.667	1.09543	0.351239	3.11877	0.00181605	0.00861889	Up	2.06455
K11685	103.612	1.66655	0.534211	3.11965	0.00181069	0.00861889	Up	2.06455
K00311	2.90139	-4.32083	1.38622	-3.117	0.00182703	0.00866004	Down	2.06248
K01682	461.604	1.5088	0.484098	3.11672	0.00182876	0.00866037	Up	2.06246
K01919	634.848	1.16184	0.372972	3.11509	0.00183888	0.00870035	Up	2.06046
K03765	207.212	2.2256	0.714798	3.11361	0.00184816	0.00872835	Up	2.05907
K13636	148.847	2.0212	0.649413	3.11235	0.00185607	0.00875775	Up	2.05761
K11258	40.0684	2.20292	0.708189	3.11064	0.00186681	0.00880046	Up	2.05549
K13953	205.567	1.73397	0.557605	3.10967	0.00187298	0.00882151	Up	2.05446
K16348	11.4306	2.5179	0.810449	3.10679	0.00189131	0.00887566	Up	2.0518
K02752	1608.22	1.32791	0.427578	3.10567	0.00189851	0.00889337	Up	2.05093
K02749	1215.19	1.04718	0.337441	3.10331	0.0019137	0.00894842	Up	2.04825
K09896	41.5338	1.64335	0.529668	3.10261	0.00191825	0.0089616	Up	2.04761
K00998	119.11	1.58338	0.5104	3.10223	0.00192066	0.00896479	Up	2.04746
K09916	29.1659	2.4221	0.781483	3.09936	0.00193937	0.00904401	Up	2.04364
K05815	220.862	1.29777	0.41962	3.09274	0.00198321	0.00919069	Up	2.03665
K07776	175.59	-1.88341	0.60942	-3.09049	0.00199825	0.00924389	Down	2.03415
K12990	534.951	-1.68424	0.545516	-3.08743	0.00201893	0.00929819	Down	2.0316
K06197	26.618	2.43938	0.790922	3.08423	0.00204082	0.00937408	Up	2.02807
K06202	75.0204	1.33897	0.434132	3.08424	0.00204075	0.00937408	Up	2.02807
K05594	79.5254	1.89731	0.615625	3.08192	0.00205667	0.00943019	Up	2.02548
K08225	311.857	1.41369	0.45898	3.08008	0.00206946	0.00947737	Up	2.02331
K10021	2.58769	5.32253	1.73109	3.07467	0.00210735	0.00961167	Up	2.0172
K16958	25.7647	1.91849	0.624242	3.07331	0.00211701	0.00964728	Up	2.0156
K19426	482.382	-2.59258	0.844877	-3.06859	0.00215075	0.00978383	Down	2.00949
K00371	663.353	1.41089	0.459923	3.06767	0.00215737	0.00980537	Up	2.00854
K11177	69.7547	1.98451	0.647153	3.06653	0.00216559	0.00982552	Up	2.00764
K14054	88.5015	2.28012	0.743783	3.06557	0.00217253	0.00984841	Up	2.00663
K12290	53.7088	2.98745	0.975713	3.06181	0.00220004	0.00994709	Up	2.0023
K06957	206.512	1.90586	0.622739	3.06045	0.00221007	0.00998374	Up	2.00071
K01822	44.0445	3.02172	0.987496	3.05998	0.00221351	0.00999059	Up	2.00041
K08993	43.2069	2.17686	0.711858	3.058	0.0022282	0.0100482	Up	1.99791
K00329	686.216	-1.8663	0.610613	-3.05644	0.00223983	0.0100831	Down	1.99641
K01823	338.631	1.11519	0.36506	3.05481	0.00225205	0.0101294	Up	1.99442
K09978	40.6507	2.29066	0.750116	3.05374	0.00226008	0.0101479	Up	1.99362
K07395	49.3718	3.31128	1.08464	3.05288	0.00226653	0.0101503	Up	1.99352
K16515	82.4983	1.88169	0.616413	3.05265	0.00226828	0.0101503	Up	1.99352
K06027	12.5592	-2.2386	0.733973	-3.04998	0.00228858	0.0102118	Down	1.9909
K05499	110.403	2.17314	0.713669	3.04502	0.00232664	0.0103194	Up	1.98635
K06048	211.294	1.87539	0.615905	3.04494	0.00232729	0.0103194	Up	1.98635
K06215	3833.44	-1.02565	0.336801	-3.04527	0.00232471	0.0103194	Down	1.98635
K07679	405.248	2.18583	0.71788	3.04484	0.00232807	0.0103194	Up	1.98635
K16936	97.2927	1.86536	0.613498	3.04053	0.00236159	0.0104501	Up	1.98088
K00009	903.363	1.09983	0.361982	3.03836	0.00237869	0.010499	Up	1.97885
K11898	4.47697	4.66098	1.53425	3.03795	0.00238191	0.0105042	Up	1.97864
K09902	26.5325	2.07505	0.683497	3.03593	0.00239797	0.0105393	Up	1.97719
K13771	123.107	1.51413	0.499085	3.0338	0.00241491	0.0105958	Up	1.97487
K16787	35.3406	2.20117	0.726035	3.03177	0.00243126	0.0106586	Up	1.9723
K00370	1606.42	1.26134	0.416156	3.03092	0.00243812	0.0106796	Up	1.97144
K15067	24.1374	3.24077	1.06974	3.02948	0.00244977	0.0107036	Up	1.97047
K05782	233.018	1.43816	0.475339	3.02554	0.00248192	0.0108183	Up	1.96584
K03756	248.377	1.66721	0.551148	3.02497	0.00248655	0.0108278	Up	1.96546
K00019	524.502	1.00999	0.334153	3.02255	0.00250655	0.0108967	Up	1.96271
K04081	54.3807	2.43862	0.807454	3.02014	0.00252659	0.0109651	Up	1.95999
K12682	247.526	2.08053	0.688877	3.02018	0.00252622	0.0109651	Up	1.95999
K08317	131.924	2.12024	0.702709	3.01724	0.00255086	0.0110431	Up	1.95691
K00893	2621.58	-1.75205	0.581074	-3.01519	0.00256822	0.0111019	Down	1.9546
K07645	259.616	1.52262	0.504993	3.01513	0.00256873	0.0111019	Up	1.9546
K08160	428.853	1.79488	0.595673	3.01319	0.00258515	0.0111543	Up	1.95256
K03549	5.49794	3.80382	1.26293	3.0119	0.00259614	0.0111832	Up	1.95143
K06165	160.948	1.21888	0.404972	3.00978	0.0026144	0.0112432	Up	1.94911
K13655	12.0659	2.59386	0.863033	3.00552	0.00265128	0.0113736	Up	1.9441
K19119	1124.48	-1.05612	0.351426	-3.00525	0.00265366	0.0113744	Down	1.94407
K04030	81.2498	1.1931	0.397217	3.00364	0.00266769	0.0114063	Up	1.94286
K00299	75.6405	1.93387	0.644338	3.00133	0.00268803	0.0114676	Up	1.94053
K02301	118.864	1.96719	0.655459	3.00124	0.00268887	0.0114676	Up	1.94053
K08996	63.8172	2.21767	0.738975	3.00101	0.00269085	0.0114676	Up	1.94053
K19162	56.6913	2.17241	0.724938	2.99668	0.00272937	0.0115937	Up	1.93578
K08276	71.0646	2.25665	0.753266	2.99582	0.00273709	0.011617	Up	1.93491
K03240	27.9741	-2.57654	0.86043	-2.99448	0.00274912	0.0116585	Down	1.93336
K00462	26.4776	2.98522	0.997399	2.993	0.00276247	0.0116865	Up	1.93232
K00216	89.7422	2.03943	0.681924	2.9907	0.00278336	0.0117557	Up	1.92975
K02822	1383.66	1.16961	0.391984	2.98381	0.0028468	0.0120139	Up	1.92031
K10094	52.2316	1.93446	0.649148	2.98	0.00288252	0.0121449	Up	1.91561
K00906	206.074	1.93066	0.648196	2.97852	0.00289648	0.0121741	Up	1.91456
K12148	29.9034	2.22982	0.748613	2.9786	0.00289566	0.0121741	Up	1.91456
K13409	19.4815	2.08318	0.699527	2.97799	0.00290149	0.0121853	Up	1.91416
K06205	272.596	1.3648	0.458689	2.97545	0.0029256	0.0122568	Up	1.91162
K14414	132.503	1.52983	0.514306	2.97455	0.00293419	0.0122829	Up	1.9107
K19225	2401.04	-1.01436	0.341151	-2.97334	0.00294574	0.0123114	Down	1.90969
K03675	55.0702	2.14952	0.723187	2.97229	0.00295591	0.0123341	Up	1.90889
K02345	29.0124	1.80492	0.607308	2.97199	0.00295872	0.0123359	Up	1.90883
K12661	121.642	1.5883	0.535392	2.96662	0.00301098	0.0125136	Up	1.90262
K03651	155.739	1.82808	0.616724	2.96418	0.0030349	0.0125935	Up	1.89985
K12262	148.891	2.01241	0.67937	2.96217	0.00305475	0.012645	Up	1.89808
K03222	29.457	1.59681	0.5393	2.9609	0.00306745	0.0126773	Up	1.89697
K08681	2436.37	-1.02668	0.346892	-2.95966	0.00307975	0.0127181	Down	1.89558
K03970	28.0297	2.20699	0.746006	2.95841	0.00309232	0.0127497	Up	1.8945
K13640	120.651	1.66475	0.563074	2.95654	0.00311108	0.0128067	Up	1.89256
K03676	32.6039	1.96065	0.663215	2.95629	0.00311367	0.0128072	Up	1.89255
K06910	334.949	1.15423	0.390638	2.95472	0.00312949	0.0128621	Up	1.89069
K02458	118.21	2.31793	0.784665	2.95404	0.00313647	0.0128806	Up	1.89006
K07690	76.9745	2.03058	0.689134	2.94657	0.00321324	0.0131543	Up	1.88093
K03782	321.292	1.42496	0.483771	2.94553	0.00322402	0.013188	Up	1.87982
K01772	298.263	1.03509	0.351795	2.9423	0.00325779	0.0133134	Up	1.87571
K07485	3797.44	-1.31251	0.446112	-2.94211	0.00325979	0.0133134	Down	1.87571
K05889	115.044	1.90253	0.64713	2.93995	0.00328267	0.0133439	Up	1.87472
K16692	460.474	2.12582	0.72346	2.93841	0.00329899	0.0133997	Up	1.8729
K04691	297.762	1.32553	0.451263	2.93739	0.00330989	0.0134335	Up	1.87181
K10751	15.467	2.25736	0.768665	2.93673	0.00331697	0.0134517	Up	1.87122
K16560	1095.48	-1.37126	0.467217	-2.93496	0.00333586	0.0135143	Down	1.86921
K12288	192.574	1.9117	0.651747	2.9332	0.00335489	0.0135429	Up	1.86829
K00846	269.318	1.00632	0.343157	2.93252	0.00336222	0.0135506	Up	1.86804
K04082	124.494	1.26378	0.43129	2.93023	0.00338713	0.0136404	Up	1.86517
K04046	190.207	1.90994	0.652079	2.92901	0.00340049	0.0136725	Up	1.86415
K15777	214.273	1.55407	0.533432	2.91335	0.00357574	0.0143112	Up	1.84432
K01212	6754.55	-1.19216	0.409601	-2.91053	0.00360819	0.0144078	Down	1.8414
K19338	113.711	1.43295	0.49244	2.9099	0.00361541	0.0144255	Up	1.84087
K07452	10296.4	-1.00752	0.346441	-2.90821	0.00363508	0.0144707	Down	1.83951
K07317	2206.98	-1.08998	0.375428	-2.90329	0.00369266	0.0146886	Down	1.83302
K09158	61.2342	1.18873	0.409592	2.90222	0.00370526	0.0147275	Up	1.83187
K11051	6.93377	1.90952	0.658104	2.90154	0.00371332	0.0147482	Up	1.83126
K05297	189.651	2.01153	0.693491	2.90058	0.00372471	0.0147822	Up	1.83026
K10815	27.8933	2.036	0.703752	2.89306	0.00381507	0.0150602	Up	1.82217
K12136	137.541	1.68655	0.583704	2.8894	0.00385978	0.0152136	Up	1.81777
K14347	155.751	1.77318	0.614005	2.88789	0.0038783	0.0152404	Up	1.817
K00892	158.454	1.72338	0.598072	2.88156	0.0039571	0.0154928	Up	1.80987
K15176	6.10645	-2.40704	0.835333	-2.88153	0.00395746	0.0154928	Down	1.80987
K07186	70.5364	1.86253	0.646701	2.88005	0.00397617	0.0155544	Up	1.80815
K07715	163.788	2.11797	0.736528	2.87561	0.00403249	0.0157155	Up	1.80367
K11644	1.84078	-2.83607	0.986182	-2.87581	0.00402996	0.0157155	Down	1.80367
K03981	262.273	1.19614	0.416128	2.87444	0.0040474	0.0157618	Up	1.80239
K08997	143.115	2.05516	0.715196	2.87355	0.00405881	0.0157826	Up	1.80182
K05596	156.411	2.19391	0.763554	2.87329	0.00406224	0.0157841	Up	1.80178
K06138	18.2765	3.20265	1.11507	2.87215	0.00407688	0.0158291	Up	1.80054
K05835	121.939	1.76182	0.613747	2.8706	0.00409697	0.0158953	Up	1.79873
K16516	110.632	1.53055	0.533384	2.86952	0.00411099	0.0159378	Up	1.79757
K01920	124.506	1.97522	0.689549	2.86451	0.0041766	0.016096	Up	1.79328
K02180	155.88	-1.57033	0.548015	-2.86549	0.00416371	0.016096	Down	1.79328
K05372	20.2127	1.79112	0.625097	2.86534	0.00416556	0.016096	Up	1.79328
K13244	83.583	2.12954	0.743345	2.86481	0.00417257	0.016096	Up	1.79328
K06141	162.474	2.10843	0.736526	2.86267	0.00420082	0.0161534	Up	1.79174
K11937	84.258	1.6069	0.561616	2.86121	0.00422026	0.0162042	Up	1.79037
K12604	5.3979	-2.85569	0.998712	-2.85938	0.00424475	0.0162862	Down	1.78818
K11926	62.307	2.12526	0.743537	2.85831	0.00425904	0.0163208	Up	1.78726
K19624	156.766	1.75596	0.614353	2.85823	0.00426005	0.0163208	Up	1.78726
K00499	48.6431	1.72721	0.604508	2.85722	0.00427367	0.0163524	Up	1.78642
K18850	234.527	1.56991	0.549466	2.85715	0.00427461	0.0163524	Up	1.78642
K02194	169.092	1.00508	0.352459	2.85162	0.00434976	0.0166277	Up	1.77917
K09971	129.584	1.49808	0.525501	2.85076	0.00436143	0.0166478	Up	1.77864
K03831	110.063	1.50997	0.529716	2.85053	0.00436466	0.0166479	Up	1.77864
K00368	16.7794	2.06287	0.725642	2.84282	0.00447168	0.0169688	Up	1.77035
K13631	58.9172	1.93593	0.681046	2.84258	0.00447493	0.0169688	Up	1.77035
K06445	244.639	1.8291	0.643884	2.84074	0.00450096	0.0170551	Up	1.76815
K12368	80.3513	1.36898	0.482054	2.83988	0.00451302	0.0170883	Up	1.7673
K02453	732.072	1.34797	0.474928	2.83826	0.00453599	0.0171129	Up	1.76668
K06140	62.5989	1.96883	0.693642	2.8384	0.00453406	0.0171129	Up	1.76668
K02024	898.773	1.21499	0.428204	2.83741	0.00454812	0.0171338	Up	1.76615
K03720	35.8074	2.02421	0.71394	2.83527	0.00457865	0.0172083	Up	1.76426
K18955	55.0451	2.094	0.739256	2.83258	0.00461747	0.0173197	Up	1.76146
K00039	43.145	2.59561	0.917921	2.8277	0.00468831	0.017497	Up	1.75704
K02612	61.639	2.339	0.827149	2.82779	0.00468709	0.017497	Up	1.75704
K02291	30.6251	2.13967	0.757094	2.82616	0.00471092	0.017531	Up	1.75619
K05501	106.437	1.17954	0.417629	2.82437	0.00473742	0.0175918	Up	1.75469
K13283	126.104	1.43404	0.507708	2.82454	0.00473492	0.0175918	Up	1.75469
K07349	122.831	2.02669	0.717782	2.82355	0.00474956	0.017605	Up	1.75436
K11201	358.724	1.63943	0.580669	2.82336	0.00475237	0.017605	Up	1.75436
K11893	218.332	1.66772	0.590797	2.82282	0.00476028	0.0176137	Up	1.75415
K13630	16.4477	2.26279	0.801754	2.8223	0.00476813	0.0176302	Up	1.75374
K07783	452.203	1.52498	0.540667	2.82055	0.00479408	0.0177009	Up	1.752
K03260	19.6104	-3.67537	1.30383	-2.8189	0.0048188	0.0177597	Down	1.75056
K02463	47.2531	3.04329	1.08024	2.81725	0.00484367	0.0178207	Up	1.74907
K13075	100.035	1.30271	0.462543	2.81641	0.00485631	0.0178546	Up	1.74825
K02193	157.519	1.20424	0.427752	2.81528	0.00487349	0.0178924	Up	1.74733
K01910	1538.61	-1.13035	0.401805	-2.81319	0.00490527	0.0179964	Down	1.74481
K02610	27.8524	2.47888	0.881546	2.81197	0.00492395	0.0180255	Up	1.74411
K13928	95.5345	2.33	0.828916	2.8109	0.00494036	0.0180486	Up	1.74356
K03863	208.687	1.72067	0.612366	2.80987	0.00495615	0.0180936	Up	1.74248
K18778	183.672	1.30065	0.463205	2.80793	0.00498606	0.01819	Up	1.74017
K05921	42.2251	3.03474	1.08115	2.80696	0.00500115	0.0182067	Up	1.73977
K07121	583.846	1.1264	0.402269	2.80012	0.00510831	0.0184803	Up	1.73329
K03380	1.34148	3.33557	1.19194	2.79845	0.00513481	0.0185503	Up	1.73165
K06169	110.88	1.99551	0.713523	2.7967	0.00516273	0.0186253	Up	1.7299
K03078	168.86	1.57147	0.562447	2.79399	0.00520623	0.018733	Up	1.72739
K07070	23.1785	2.0655	0.73927	2.79398	0.00520645	0.018733	Up	1.72739
K07643	164.206	2.03536	0.728549	2.79372	0.00521064	0.018733	Up	1.72739
K07978	36.6756	1.58149	0.566049	2.79391	0.00520747	0.018733	Up	1.72739
K11911	8.22712	3.0501	1.09187	2.79346	0.00521471	0.0187347	Up	1.72735
K03112	302.172	1.88015	0.673819	2.79028	0.00526617	0.0188674	Up	1.72429
K04516	52.6541	-1.83842	0.659047	-2.78951	0.00527872	0.0188993	Down	1.72355
K19048	79.9474	1.4309	0.513041	2.78906	0.00528617	0.018913	Up	1.72324
K06954	72.5752	2.21535	0.7952	2.7859	0.00533797	0.0190721	Up	1.7196
K02480	37.1461	1.76439	0.633466	2.7853	0.0053478	0.0190809	Up	1.7194
K13932	94.6659	2.24232	0.805769	2.78284	0.00538861	0.0192133	Up	1.7164
K01247	234.496	1.16394	0.41895	2.77823	0.00546557	0.0194344	Up	1.71143
K09136	337.075	1.16173	0.418139	2.77834	0.00546381	0.0194344	Up	1.71143
K19335	49.6179	2.21711	0.797992	2.77836	0.00546341	0.0194344	Up	1.71143
K18608	35.1345	1.59702	0.575378	2.7756	0.00551002	0.0195523	Up	1.7088
K02585	52.6534	1.38039	0.497546	2.77441	0.00553027	0.0196107	Up	1.70751
K10914	183.176	1.03088	0.37217	2.76992	0.00560701	0.0198422	Up	1.70241
K11743	88.3103	1.29726	0.46863	2.76821	0.0056366	0.0199063	Up	1.70101
K16435	767.679	-2.88726	1.04318	-2.76775	0.00564439	0.0199203	Down	1.7007
K01317	20.0919	-2.14562	0.775374	-2.76721	0.00565388	0.0199313	Down	1.70046
K08070	15.4977	3.14765	1.13832	2.76518	0.00568917	0.0200126	Up	1.6987
K09806	51.8651	1.77805	0.643029	2.76512	0.00569011	0.0200126	Up	1.6987
K13795	30.198	2.93963	1.06378	2.76339	0.00572045	0.0200697	Up	1.69746
K11906	121.705	1.80673	0.653908	2.76298	0.00572768	0.0200778	Up	1.69728
K02199	141.741	1.07918	0.390974	2.76024	0.00577597	0.0202334	Up	1.69393
K08351	135.781	1.98047	0.718302	2.75715	0.00583069	0.0203976	Up	1.69042
K01141	266.992	1.06679	0.387454	2.75334	0.00589898	0.0205862	Up	1.68642
K07000	4005.47	-1.18429	0.430142	-2.75326	0.00590044	0.0205862	Down	1.68642
K09160	54.1151	1.60644	0.584317	2.74927	0.00597288	0.020797	Up	1.682
K01630	422.745	1.05692	0.384554	2.74844	0.00598803	0.0208218	Up	1.68148
K11071	275.337	1.04276	0.379396	2.74846	0.00598751	0.0208218	Up	1.68148
K09023	90.884	2.02584	0.737453	2.74708	0.0060129	0.0208804	Up	1.68026
K00122	38.089	2.24898	0.819077	2.74575	0.00603725	0.0209308	Up	1.67922
K04035	127.18	2.21479	0.807172	2.74389	0.00607165	0.0210142	Up	1.67749
K13628	99.2808	1.14631	0.418069	2.74192	0.0061082	0.0210985	Up	1.67575
K19804	247.915	1.15035	0.419519	2.74206	0.00610559	0.0210985	Up	1.67575
K02255	39.1453	2.36134	0.862556	2.73761	0.00618875	0.02132	Up	1.67121
K02782	421.08	1.21987	0.446404	2.73265	0.00628276	0.0216009	Up	1.66553
K03465	4700.29	-1.10865	0.405759	-2.73228	0.00628971	0.0216105	Down	1.66534
K02339	96.6096	1.28399	0.470077	2.73144	0.00630589	0.0216375	Up	1.66479
K04764	78.1116	1.01937	0.373822	2.7269	0.00639333	0.0218797	Up	1.65996
K15973	234.127	1.1155	0.40911	2.72666	0.00639788	0.0218808	Up	1.65994
K03227	21.5712	1.55963	0.572214	2.7256	0.00641848	0.0219224	Up	1.65911
K04755	76.9019	1.15522	0.425297	2.71627	0.0066022	0.0224613	Up	1.64856
K00354	269.038	1.09709	0.40402	2.71545	0.00661866	0.0225026	Up	1.64777
K18568	48.0926	2.03938	0.75137	2.71422	0.00664327	0.0225715	Up	1.64644
K05805	127.309	1.11795	0.412601	2.70953	0.00673784	0.0228378	Up	1.64135
K19227	222.86	1.25197	0.462963	2.70426	0.00684577	0.0231535	Up	1.63538
K02812	24.3641	2.27108	0.840082	2.70341	0.00686327	0.0231976	Up	1.63456
K08081	83.0442	1.29892	0.480515	2.70318	0.00686795	0.0231983	Up	1.63454
K01807	13.9851	-1.47491	0.546523	-2.69871	0.00696088	0.023436	Down	1.63012
K07224	163.158	1.30915	0.485055	2.69898	0.0069553	0.023436	Up	1.63012
K19273	13.0046	2.83746	1.05175	2.69786	0.00697873	0.0234657	Up	1.62957
K02609	75.6476	1.70598	0.63408	2.69048	0.00713502	0.0239447	Up	1.62079
K02403	33.4053	2.075	0.771372	2.69002	0.0071448	0.0239621	Up	1.62048
K00974	163.837	1.38561	0.515323	2.68882	0.00717061	0.0240331	Up	1.61919
K00322	296.008	1.35253	0.503414	2.68671	0.00721587	0.0241536	Up	1.61702
K17717	53.0667	2.06546	0.768752	2.68677	0.0072147	0.0241536	Up	1.61702
K01146	121.309	1.74477	0.649486	2.68639	0.0072228	0.0241613	Up	1.61688
K19000	29.8309	1.90457	0.709128	2.68579	0.00723586	0.0241894	Up	1.61638
K00449	71.596	1.48907	0.555299	2.68157	0.00732779	0.0244495	Up	1.61173
K03776	5.1715	3.48123	1.30114	2.67551	0.00746154	0.0248102	Up	1.60537
K09801	59.4539	1.2845	0.480397	2.67383	0.007499	0.024877	Up	1.6042
K11477	42.9258	1.59247	0.596124	2.67138	0.00755411	0.0249967	Up	1.60212
K13650	38.6061	2.05486	0.769217	2.67136	0.00755436	0.0249967	Up	1.60212
K18650	701.625	1.01422	0.379656	2.67142	0.00755317	0.0249967	Up	1.60212
K03745	23.867	1.42205	0.532758	2.66923	0.00760244	0.0251079	Up	1.60019
K16917	14.116	2.51849	0.944071	2.66769	0.00763737	0.0251752	Up	1.59903
K02508	191.103	1.55929	0.584696	2.66683	0.00765695	0.025204	Up	1.59853
K09384	1584.13	-1.25772	0.471696	-2.66638	0.00766737	0.0252101	Down	1.59843
K13053	93.2635	1.8122	0.680058	2.66478	0.00770392	0.0253143	Up	1.59663
K00813	536.225	1.23215	0.4627	2.66295	0.00774592	0.0254041	Up	1.5951
K02169	299.616	1.21381	0.455803	2.66302	0.00774437	0.0254041	Up	1.5951
K18919	16.1854	2.34783	0.883578	2.65718	0.00787972	0.0258266	Up	1.58793
K07109	270.068	1.15219	0.433655	2.65692	0.00788592	0.0258306	Up	1.58787
K00897	72.9195	1.34821	0.507652	2.65578	0.00791248	0.0259013	Up	1.58668
K18926	861.111	1.38084	0.520755	2.65161	0.00801098	0.026125	Up	1.58294
K03796	142.351	1.56428	0.590613	2.64858	0.00808313	0.0263272	Up	1.5796
K01322	2521.27	-1.03315	0.390325	-2.6469	0.00812329	0.0263817	Down	1.5787
K00529	303.005	1.09454	0.413618	2.64627	0.00813859	0.0264085	Up	1.57826
K07300	120.77	1.53545	0.580808	2.64365	0.00820171	0.0265635	Up	1.57571
K13849	5.91045	4.69641	1.77804	2.64133	0.00825804	0.0267126	Up	1.57328
K13009	5.44896	3.24741	1.23017	2.63982	0.00829509	0.0267991	Up	1.57188
K19003	65.8207	-1.72377	0.653269	-2.63869	0.00832278	0.0268552	Down	1.57097
K01971	2936.33	-1.09123	0.413642	-2.6381	0.00833727	0.0268852	Down	1.57049
K03727	313.938	1.65219	0.626391	2.63764	0.00834852	0.0269048	Up	1.57017
K12573	35.9879	-1.37391	0.521268	-2.6357	0.00839631	0.0270253	Down	1.56823
K07236	59.2796	1.71574	0.65141	2.63389	0.00844122	0.0271362	Up	1.56645
K14832	10.4385	2.15533	0.82019	2.62784	0.00859283	0.0275554	Up	1.55979
K08178	0.942901	3.04535	1.16205	2.62068	0.00877533	0.0280713	Up	1.55174
K06166	375.062	1.16949	0.44801	2.6104	0.00904366	0.0288329	Up	1.54011
K07264	764.93	1.15892	0.444425	2.60767	0.00911597	0.0290181	Up	1.53733
K02972	2.63718	2.71531	1.04215	2.60548	0.00917451	0.0291865	Up	1.53482
K16087	406.417	1.35293	0.519391	2.60483	0.00919187	0.0292238	Up	1.53426
K19587	29.6595	2.75666	1.05852	2.60427	0.00920706	0.0292542	Up	1.53381
K13651	8.07132	2.63939	1.01378	2.60352	0.00922722	0.0293004	Up	1.53313
K11895	234.416	1.57503	0.605765	2.60006	0.00932071	0.0295391	Up	1.5296
K02849	98.2205	1.88321	0.724619	2.59889	0.00935246	0.0296076	Up	1.5286
K04757	57.2286	1.35353	0.521566	2.59512	0.00945573	0.0298799	Up	1.52462
K07279	147.845	1.72625	0.665305	2.59467	0.00946816	0.029901	Up	1.52431
K13014	258.666	1.5933	0.614383	2.59334	0.00950501	0.0299991	Up	1.52289
K07225	126.614	2.05756	0.794973	2.58821	0.00964748	0.030384	Up	1.51736
K03713	8.04201	-1.60297	0.619499	-2.58753	0.00966673	0.0303987	Down	1.51714
K15576	91.4772	2.57738	0.99778	2.58312	0.00979116	0.0307342	Up	1.51238
K06039	55.4116	1.47738	0.572168	2.58208	0.00982058	0.0307562	Up	1.51207
K01150	165.164	1.0435	0.404314	2.58091	0.0098539	0.0308361	Up	1.51094
K03746	115.33	1.19148	0.46246	2.5764	0.00998343	0.031187	Up	1.50603
K05375	25.8338	1.95792	0.760224	2.57545	0.010011	0.0312543	Up	1.50509
K03926	67.8776	1.43408	0.556986	2.57472	0.0100322	0.0313018	Up	1.50443
K08344	4.74835	4.93839	1.92024	2.57176	0.0101183	0.0315136	Up	1.5015
K02593	3.57569	4.53369	1.7635	2.57085	0.0101448	0.0315231	Up	1.50137
K12146	171.62	1.7395	0.677203	2.56866	0.0102094	0.0317022	Up	1.49891
K02596	19.9648	3.80053	1.47994	2.56804	0.0102276	0.0317207	Up	1.49866
K13695	110.164	1.52283	0.593708	2.56495	0.0103192	0.0319229	Up	1.4959
K19047	27.3691	2.20776	0.860724	2.56501	0.0103173	0.0319229	Up	1.4959
K11534	152.823	1.11262	0.434039	2.56341	0.0103649	0.0320269	Up	1.49448
K11444	2.96055	2.76783	1.08072	2.5611	0.0104341	0.0321121	Up	1.49333
K11903	104.099	1.52049	0.594156	2.55908	0.0104949	0.0322802	Up	1.49106
K01252	96.8839	1.79894	0.703218	2.55815	0.0105229	0.0323471	Up	1.49016
K08087	17.2129	3.88789	1.52172	2.55492	0.0106211	0.0326104	Up	1.48664
K02344	97.9267	1.58079	0.620168	2.54897	0.0108043	0.0331335	Up	1.47973
K07287	300.48	1.063	0.417191	2.548	0.0108343	0.0331691	Up	1.47927
K07803	89.3067	1.43159	0.562315	2.54589	0.0109	0.0333483	Up	1.47693
K02327	3.66185	-5.76531	2.26689	-2.54327	0.0109821	0.0335403	Down	1.47443
K01188	5.32016	1.30593	0.513783	2.5418	0.0110285	0.0336267	Up	1.47332
K04785	101.834	1.70067	0.66969	2.53949	0.0111013	0.0338249	Up	1.47076
K02597	11.7105	4.1677	1.64723	2.53012	0.0114023	0.0346202	Up	1.46067
K01725	29.5804	2.04782	0.809634	2.52932	0.0114285	0.0346793	Up	1.45993
K01960	161.566	-1.40544	0.555852	-2.52844	0.0114571	0.0347459	Down	1.4591
K03636	46.0878	1.13468	0.449001	2.52712	0.0115003	0.0348362	Up	1.45797
K07262	2.31152	3.84834	1.52304	2.52676	0.0115121	0.0348517	Up	1.45778
K18531	45.1222	2.06991	0.819415	2.52608	0.0115342	0.0348908	Up	1.45729
K06190	112.804	1.04098	0.4122	2.52543	0.0115557	0.0349226	Up	1.45689
K18816	41.4362	-1.32333	0.52435	-2.52376	0.0116108	0.0350688	Down	1.45508
K06988	63.1036	-2.55535	1.01301	-2.52253	0.0116514	0.0351684	Down	1.45385
K14972	1.97118	-4.09463	1.62788	-2.51531	0.0118927	0.0357952	Down	1.44618
K09701	63.0532	2.62736	1.04501	2.5142	0.0119303	0.0358668	Up	1.44531
K00374	58.4873	1.13683	0.452336	2.51324	0.011963	0.0359234	Up	1.44462
K05781	205.534	1.06566	0.424097	2.51277	0.0119787	0.0359433	Up	1.44438
K07493	29902.7	-1.06505	0.423876	-2.51263	0.0119834	0.0359433	Down	1.44438
K04781	43.3511	2.33424	0.930456	2.50871	0.0121174	0.036199	Up	1.4413
K02080	160.02	1.09948	0.438552	2.50706	0.012174	0.0362846	Up	1.44028
K19171	4940.62	-1.17161	0.467303	-2.50717	0.0121701	0.0362846	Down	1.44028
K03207	32.1037	1.91735	0.765091	2.50604	0.0122091	0.0363684	Up	1.43928
K01760	15.0751	1.71063	0.683779	2.50173	0.0123589	0.0367933	Up	1.43423
K07700	43.5735	1.45258	0.581393	2.49845	0.0124737	0.0370291	Up	1.43146
K11292	7.42073	1.89937	0.760642	2.49706	0.0125228	0.0371467	Up	1.43008
K09477	191.745	1.55543	0.623543	2.4945	0.0126135	0.0373586	Up	1.42761
K03740	90.5266	-1.18909	0.476752	-2.49415	0.0126258	0.0373721	Down	1.42745
K15876	120.653	-1.29804	0.520716	-2.49281	0.0126738	0.0374732	Down	1.42628
K06195	56.6291	1.68893	0.67896	2.48753	0.0128635	0.037926	Up	1.42106
K13184	19.498	-1.90236	0.764714	-2.48767	0.0128583	0.037926	Down	1.42106
K09131	65.2929	1.15589	0.46495	2.48604	0.0129172	0.0379981	Up	1.42024
K07267	3152.8	-1.1035	0.444189	-2.48431	0.0129804	0.038142	Down	1.4186
K12516	148.621	1.91925	0.773487	2.4813	0.0130905	0.038421	Up	1.41543
K03643	154.911	1.11273	0.44856	2.48068	0.0131133	0.0384457	Up	1.41515
K18862	53.4078	2.17262	0.876335	2.47921	0.0131675	0.0385731	Up	1.41372
K05922	869.233	1.24952	0.5045	2.47675	0.0132585	0.0387826	Up	1.41136
K14491	135.736	-1.91984	0.775349	-2.4761	0.0132825	0.0388309	Down	1.41082
K18555	26.8747	1.37776	0.55653	2.47563	0.0133002	0.038861	Up	1.41049
K00121	325.013	1.17698	0.475636	2.47455	0.0133405	0.038913	Up	1.4099
K03268	109.118	1.75073	0.708	2.47278	0.0134068	0.0389998	Up	1.40894
K04033	6282.77	-1.9024	0.769345	-2.47275	0.0134078	0.0389998	Down	1.40894
K02770	290.847	1.00213	0.405518	2.47123	0.0134649	0.0391003	Up	1.40782
K06139	176.342	1.65277	0.669056	2.47031	0.0134998	0.0391795	Up	1.40694
K02402	45.7781	2.03272	0.823425	2.46861	0.0135638	0.0393434	Up	1.40513
K07503	122.312	1.69041	0.685031	2.46764	0.0136005	0.0394059	Up	1.40444
K14194	161.714	-1.19539	0.484624	-2.46664	0.0136389	0.0394951	Down	1.40346
K06899	82.5863	1.47403	0.598456	2.46305	0.013776	0.0398058	Up	1.40005
K08166	1.24839	3.50042	1.42119	2.46303	0.0137769	0.0398058	Up	1.40005
K00480	7.73829	2.74102	1.11405	2.46042	0.0138775	0.0400742	Up	1.39713
K07486	11504.9	-1.01221	0.411624	-2.45907	0.0139299	0.0402032	Down	1.39574
K02781	142.345	1.17206	0.477951	2.45226	0.0141962	0.0408583	Up	1.38872
K06045	42.8589	2.26837	0.925794	2.45019	0.0142783	0.0410296	Up	1.3869
K08994	72.3684	1.78069	0.726863	2.44983	0.0142925	0.0410445	Up	1.38675
K00381	17.3609	1.84885	0.754982	2.44886	0.0143308	0.0411317	Up	1.38582
K02392	147.664	1.09801	0.449066	2.4451	0.0144813	0.0414721	Up	1.38224
K12984	1272.16	-1.03657	0.424068	-2.44434	0.0145116	0.0415359	Down	1.38158
K05709	26.0936	2.11908	0.867117	2.44382	0.0145328	0.0415738	Up	1.38118
K02247	7.88794	-1.50102	0.614589	-2.44231	0.0145938	0.0416793	Down	1.38008
K06945	1.02135	-2.99424	1.22609	-2.44211	0.0146019	0.0416796	Down	1.38008
K06328	12.5758	-1.63556	0.670745	-2.43842	0.0147514	0.0420371	Down	1.37637
K02570	20.6034	1.40448	0.576211	2.43744	0.0147918	0.0420907	Up	1.37581
K12248	91.3835	1.6666	0.684409	2.43509	0.0148881	0.0423291	Up	1.37336
K09825	361.415	-1.21722	0.500014	-2.43438	0.0149173	0.0423577	Down	1.37307
K06006	208.293	1.51781	0.624113	2.43195	0.0150179	0.0426074	Up	1.37052
K07351	71.9668	2.44472	1.00533	2.43177	0.0150254	0.0426074	Up	1.37052
K03846	14.5044	-2.61498	1.0763	-2.4296	0.0151153	0.0428157	Down	1.3684
K14273	73.6833	-1.83612	0.757992	-2.42234	0.0154209	0.0435862	Down	1.36065
K08476	76.3785	2.56581	1.06149	2.41718	0.0156414	0.0440656	Up	1.3559
K08268	179.401	1.9028	0.787264	2.41698	0.01565	0.0440661	Up	1.3559
K19811	123.269	1.0369	0.429302	2.41531	0.0157219	0.0442446	Up	1.35414
K03626	64.7012	-1.58324	0.655652	-2.41476	0.0157455	0.0442869	Down	1.35372
K03392	186.452	1.20674	0.499933	2.41379	0.0157874	0.0443808	Up	1.35281
K04066	351.916	1.12049	0.465394	2.40762	0.0160567	0.045016	Up	1.34663
K11894	17.0911	-2.07839	0.863383	-2.40726	0.0160728	0.0450367	Down	1.34643
K07466	2.53384	-3.75227	1.56219	-2.40193	0.0163088	0.0455751	Down	1.34127
K11929	8.79237	1.98606	0.82761	2.39975	0.0164062	0.0458226	Up	1.33892
K01690	186.707	1.59139	0.663282	2.39927	0.0164277	0.045844	Up	1.33872
K00938	13.7379	-1.55583	0.648586	-2.39881	0.0164486	0.0458636	Down	1.33853
K02656	6.56229	1.81077	0.754915	2.39864	0.0164561	0.0458636	Up	1.33853
K07721	1.42455	-3.59419	1.49862	-2.39833	0.0164699	0.0458774	Down	1.3384
K13296	12.286	2.43814	1.01748	2.39626	0.0165633	0.0461126	Up	1.33618
K03279	866.662	-1.08825	0.4542	-2.39597	0.0165763	0.0461243	Down	1.33607
K11779	328.747	1.57286	0.656537	2.39569	0.0165891	0.046135	Up	1.33597
K06044	6.61677	1.54658	0.646018	2.39401	0.0166652	0.0462971	Up	1.33445
K02414	138.045	1.24066	0.518325	2.39359	0.0166844	0.0463215	Up	1.33422
K08368	154.226	1.42246	0.594474	2.3928	0.0167203	0.0463759	Up	1.33371
K11928	657.308	1.11514	0.46637	2.39111	0.0167975	0.0465403	Up	1.33217
K15383	24.6463	2.05019	0.858314	2.38862	0.0169118	0.046782	Up	1.32992
K09139	5.09966	-4.8633	2.03641	-2.38817	0.0169324	0.0468143	Down	1.32962
K02442	23.4459	1.88701	0.792745	2.38035	0.017296	0.0477179	Up	1.32132
K00364	183.998	1.0042	0.421942	2.37994	0.0173157	0.0477214	Up	1.32129
K06330	604.65	1.00599	0.422683	2.38001	0.0173123	0.0477214	Up	1.32129
K07454	1094.36	-1.07927	0.453528	-2.37972	0.0173259	0.0477244	Down	1.32126
K02866	42.0984	1.81394	0.762568	2.37872	0.0173728	0.0477774	Up	1.32078
K02783	196.491	1.22956	0.517845	2.37439	0.0175782	0.0482148	Up	1.31682
K06192	543.36	1.07514	0.453446	2.37104	0.0177379	0.0484991	Up	1.31427
K01160	192.173	1.02458	0.432401	2.36952	0.0178113	0.048623	Up	1.31316
K07334	1234.3	-1.10883	0.468583	-2.36634	0.0179649	0.0489394	Down	1.31034
K08967	36.4972	2.36165	1.00031	2.36092	0.0182296	0.0495825	Up	1.30467
K19418	520.257	-1.18509	0.501946	-2.36099	0.0182264	0.0495825	Down	1.30467
K00076	71.646	1.76518	0.747832	2.36039	0.0182556	0.0496273	Up	1.30428
K09961	585.324	1.15846	0.491427	2.35733	0.0184068	0.0499508	Up	1.30146

## Sheet: Supplementary dataset S3B
LC_post vs HCs
ID	baseMean	log2FoldChange	lfcSE	stat	pvalue	padj	sig	logP	label
K06876	6.30947	22.2303	1.50451	14.7758	2.1e-49	1.11e-45	Up	44.9536	K06876
K09187	7.99634	23.0018	2.16608	10.6191	2.43e-26	6.44e-23	Up	22.1911	K09187
K11533	1467.9	4.71482	0.513903	9.17455	4.53e-20	8.01e-17	Up	16.0961	K11533
K02658	699.579	-6.34809	0.725038	-8.75553	2.03e-18	2.69e-15	Down	14.5698	K02658
K01080	76.7189	5.19745	0.637588	8.15175	3.59e-16	3.8e-13	Up	12.4198	K01080
K16925	276.77	3.95104	0.486224	8.12596	4.44e-16	3.92e-13	Up	12.4065	K16925
K11263	463.483	4.35936	0.538474	8.09576	5.69e-16	4.31e-13	Up	12.3655	K11263
K13571	443.734	5.36746	0.666379	8.05467	7.97e-16	5.28e-13	Up	12.2772	K13571
K13940	52.1045	5.34052	0.667942	7.99548	1.29e-15	7.6e-13	Up	12.119	K13940
K08152	294.148	3.8449	0.495527	7.7592	8.55e-15	4.53e-12	Up	11.3438	K08152
K10007	91.2324	4.61373	0.599133	7.70068	1.35e-14	6.52e-12	Up	11.1855	K10007
K01210	289.687	3.17477	0.41547	7.64139	2.15e-14	9.49e-12	Up	11.0225
K13640	120.651	4.1086	0.549957	7.47077	7.97e-14	3.25e-11	Up	10.4879
K05838	406.176	2.98777	0.413942	7.21784	5.28e-13	2e-10	Up	9.6989
K04092	57.8936	4.98036	0.718825	6.92848	4.25e-12	1.5e-09	Up	8.82286
K16028	92.8862	5.06609	0.741231	6.83469	8.22e-12	2.61e-09	Up	8.58345
K18926	861.111	3.48021	0.50939	6.83212	8.37e-12	2.61e-09	Up	8.58345
K03786	134.722	2.71865	0.398802	6.81705	9.29e-12	2.74e-09	Up	8.56267
K06979	274.437	4.23121	0.622414	6.79806	1.06e-11	2.96e-09	Up	8.52887
K06857	75.2284	2.82306	0.420175	6.71877	1.83e-11	4.86e-09	Up	8.31352
K00354	269.038	2.63614	0.394974	6.67421	2.49e-11	6.28e-09	Up	8.20233
K04066	351.916	2.99055	0.455064	6.57172	4.97e-11	1.2e-08	Up	7.92131
K13598	231.302	3.66512	0.55873	6.55974	5.39e-11	1.24e-08	Up	7.90569
K00889	122.706	-4.44703	0.680484	-6.53509	6.36e-11	1.4e-08	Down	7.85252	K00889
K13527	105.81	4.77781	0.735206	6.49859	8.11e-11	1.72e-08	Up	7.76462
K05889	115.044	4.03976	0.632491	6.38707	1.69e-10	3.45e-08	Up	7.4624
K10001	69.6589	4.87099	0.763447	6.38026	1.77e-10	3.47e-08	Up	7.45946
K03300	878.835	2.11592	0.331932	6.37455	1.84e-10	3.47e-08	Up	7.45907
K03727	313.938	3.8876	0.612578	6.34629	2.21e-10	4.03e-08	Up	7.39441
K00886	47.3943	4.42507	0.697976	6.33986	2.3e-10	4.05e-08	Up	7.39269
K03752	119.784	-2.61403	0.412606	-6.33541	2.37e-10	4.05e-08	Down	7.39269	K03752
K07116	17.0277	-9.10779	1.44203	-6.31594	2.69e-10	4.31e-08	Down	7.3651	K07116
K18955	55.0451	4.56011	0.721782	6.31785	2.65e-10	4.31e-08	Up	7.3651
K06986	13.6395	-6.61413	1.04963	-6.30137	2.95e-10	4.6e-08	Down	7.3377	K06986
K16650	69.951	6.59169	1.04679	6.29706	3.03e-10	4.6e-08	Up	7.3377
K07641	431.435	2.52128	0.40664	6.20028	5.64e-10	8.3e-08	Up	7.08088
K00997	535.384	1.2862	0.209253	6.14666	7.91e-10	1.1e-07	Up	6.95699
K13288	308.353	2.58655	0.420518	6.15086	7.71e-10	1.1e-07	Up	6.95699
K01492	18.9507	-4.92475	0.801912	-6.14126	8.19e-10	1.11e-07	Down	6.95351	K01492
K03338	91.1848	2.45769	0.403402	6.09241	1.11e-09	1.47e-07	Up	6.83141
K02688	1022.1	1.69193	0.279254	6.05876	1.37e-09	1.77e-07	Up	6.75107
K08296	157.634	2.51648	0.417034	6.03423	1.6e-09	2.02e-07	Up	6.69544
K07685	56.7045	6.13365	1.02152	6.00444	1.92e-09	2.37e-07	Up	6.62573
K06999	308.742	2.71179	0.454903	5.96125	2.5e-09	3.02e-07	Up	6.52052
K06436	65.0291	-3.87009	0.651874	-5.93686	2.91e-09	3.42e-07	Down	6.46559	K06436
K01121	95.4233	3.69006	0.628353	5.87259	4.29e-09	4.95e-07	Up	6.30582
K00872	1393.75	1.38548	0.236534	5.85741	4.7e-09	5.3e-07	Up	6.27542
K05589	273.999	1.56336	0.268427	5.82417	5.74e-09	6.34e-07	Up	6.19791
K07503	122.312	3.89364	0.669592	5.81495	6.07e-09	6.56e-07	Up	6.1829
K15352	40.2148	5.15061	0.8903	5.78525	7.24e-09	7.68e-07	Up	6.11477
K09009	41.9559	4.0256	0.69721	5.77387	7.75e-09	8.05e-07	Up	6.09399
K06191	72.9461	3.14312	0.545128	5.76583	8.13e-09	8.28e-07	Up	6.08171
K00104	1253.05	1.62699	0.282578	5.75765	8.53e-09	8.53e-07	Up	6.06893
K00619	210.85	1.99208	0.346904	5.74244	9.33e-09	9.16e-07	Up	6.03797
K16066	6.97963	5.51882	0.96686	5.70798	1.14e-08	1.1e-06	Up	5.95778
K13788	530.701	2.20047	0.3896	5.64803	1.62e-08	1.54e-06	Up	5.81344
K10742	1789.5	-3.92099	0.696971	-5.62577	1.85e-08	1.69e-06	Down	5.77255	K10742
K01792	340.525	2.86429	0.510963	5.60567	2.07e-08	1.86e-06	Up	5.72949
K10429	182.682	-5.8814	1.05186	-5.59142	2.25e-08	1.99e-06	Down	5.7011	K10429
K06044	6.61677	3.47147	0.621653	5.58426	2.35e-08	2.04e-06	Up	5.69038
K00989	690.485	1.78474	0.319778	5.58117	2.39e-08	2.04e-06	Up	5.68972
K09805	118.017	-4.32991	0.778925	-5.55883	2.72e-08	2.25e-06	Down	5.64783	K09805
K16036	63.4745	-4.2738	0.768481	-5.56136	2.68e-08	2.25e-06	Down	5.64783
K17234	14.6067	-9.31615	1.69023	-5.51175	3.55e-08	2.86e-06	Down	5.54402
K18206	215.599	3.00888	0.545923	5.51154	3.56e-08	2.86e-06	Up	5.54402
K10231	154.167	-3.47943	0.632367	-5.50224	3.75e-08	2.97e-06	Down	5.5276
K01697	802.355	2.30911	0.421168	5.48265	4.19e-08	3.22e-06	Up	5.49168
K00481	70.7327	2.75753	0.509583	5.41135	6.26e-08	4.74e-06	Up	5.32443
K09471	377.586	2.55934	0.473765	5.40212	6.59e-08	4.92e-06	Up	5.30821
K06330	604.65	2.22438	0.413451	5.38003	7.45e-08	5.48e-06	Up	5.26088
K07230	134.784	3.02885	0.563496	5.3751	7.65e-08	5.56e-06	Up	5.25499
K10805	248.839	2.85188	0.533782	5.34278	9.15e-08	6.56e-06	Up	5.18323
K07223	466.591	2.19832	0.411922	5.33674	9.46e-08	6.69e-06	Up	5.17458
K06900	43.7675	-4.55171	0.85365	-5.33205	9.71e-08	6.77e-06	Down	5.16912
K00936	700.101	1.58598	0.297858	5.32463	1.01e-07	6.88e-06	Up	5.16265
K07442	93.3338	2.93068	0.550238	5.3262	1e-07	6.88e-06	Up	5.16265
K13003	440.325	-5.39376	1.01432	-5.31763	1.05e-07	7.06e-06	Down	5.15146
K05813	846.052	1.99486	0.375832	5.30784	1.11e-07	7.35e-06	Up	5.1336
K01239	1031.07	1.47815	0.279281	5.29269	1.21e-07	7.89e-06	Up	5.10294
K02553	295.721	2.05693	0.392045	5.24665	1.55e-07	9.78e-06	Up	5.00982
K18220	16579.7	-1.324	0.252345	-5.24678	1.55e-07	9.78e-06	Down	5.00982
K00325	266.887	2.34883	0.450071	5.2188	1.8e-07	1.12e-05	Up	4.94949
K05714	77.6265	3.45554	0.663566	5.20753	1.91e-07	1.14e-05	Up	4.94389
K05895	940.767	1.17277	0.225211	5.20741	1.91e-07	1.14e-05	Up	4.94389
K05964	1084.74	1.32266	0.254033	5.20662	1.92e-07	1.14e-05	Up	4.94389
K10824	436.189	1.62247	0.311666	5.2058	1.93e-07	1.14e-05	Up	4.94389
K01637	174.071	2.10771	0.405543	5.19725	2.02e-07	1.18e-05	Up	4.92869
K00982	900.533	1.90665	0.367544	5.18756	2.13e-07	1.2e-05	Up	4.92015
K02770	290.847	2.05815	0.396574	5.18982	2.1e-07	1.2e-05	Up	4.92015
K11736	58.4362	2.71138	0.52267	5.18755	2.13e-07	1.2e-05	Up	4.92015
K00114	184.435	2.92517	0.565145	5.17597	2.27e-07	1.27e-05	Up	4.89777
K16148	39.9941	3.74482	0.724767	5.16693	2.38e-07	1.31e-05	Up	4.88131
K09952	7975.42	-1.50535	0.291548	-5.1633	2.43e-07	1.33e-05	Down	4.87737
K08483	1918.21	1.56247	0.303083	5.15525	2.53e-07	1.36e-05	Up	4.86735
K18816	41.4362	-2.6661	0.517171	-5.15515	2.53e-07	1.36e-05	Down	4.86735
K07486	11504.9	-2.07373	0.402745	-5.14898	2.62e-07	1.37e-05	Down	4.86174
K08369	824.682	2.3031	0.447189	5.15017	2.6e-07	1.37e-05	Up	4.86174
K11939	236.874	2.40606	0.468057	5.14053	2.74e-07	1.42e-05	Up	4.84646
K02304	8.92549	-5.38276	1.04948	-5.12896	2.91e-07	1.49e-05	Down	4.82564
K02467	850.023	1.50271	0.293048	5.12786	2.93e-07	1.49e-05	Up	4.82564
K01919	634.848	1.86909	0.364862	5.12275	3.01e-07	1.52e-05	Up	4.81801
K06132	2359.46	-1.12799	0.221183	-5.09979	3.4e-07	1.7e-05	Down	4.76936
K06373	766.301	-1.05441	0.20731	-5.08613	3.65e-07	1.81e-05	Down	4.74211
K03724	1068.64	2.33692	0.462181	5.05629	4.27e-07	2.02e-05	Up	4.69386
K01389	482.636	2.01867	0.399649	5.05111	4.39e-07	2.03e-05	Up	4.69205
K01708	205.964	2.10232	0.416263	5.05045	4.41e-07	2.03e-05	Up	4.69205
K02072	2170.77	1.03519	0.204839	5.05369	4.33e-07	2.03e-05	Up	4.69205
K01519	13.7388	-6.35439	1.25987	-5.0437	4.57e-07	2.09e-05	Down	4.68046
K03894	37.8979	4.54062	0.902558	5.03084	4.88e-07	2.19e-05	Up	4.65871
K07688	21.5511	4.35714	0.867328	5.02364	5.07e-07	2.26e-05	Up	4.64608
K00129	101.845	3.42374	0.682377	5.01738	5.24e-07	2.31e-05	Up	4.63557
K11083	42.3234	4.5774	0.914825	5.00359	5.63e-07	2.47e-05	Up	4.60804
K07795	269.815	1.97672	0.395353	4.9999	5.74e-07	2.49e-05	Up	4.6033
K13485	15.183	5.03829	1.01216	4.97775	6.43e-07	2.77e-05	Up	4.55706
K03293	3766.61	1.50504	0.302543	4.97463	6.54e-07	2.8e-05	Up	4.55359
K06386	19.417	-2.89412	0.582006	-4.97266	6.6e-07	2.8e-05	Down	4.55267
K00324	386.239	2.07115	0.417421	4.96178	6.99e-07	2.94e-05	Up	4.53176
K07071	578.708	1.80112	0.364385	4.94291	7.7e-07	3.19e-05	Up	4.49647
K04561	177.19	2.77709	0.562025	4.94123	7.76e-07	3.19e-05	Up	4.4961
K10678	554.597	1.3058	0.264969	4.92812	8.3e-07	3.39e-05	Up	4.47029
K01214	9.85469	3.37458	0.685317	4.92411	8.47e-07	3.43e-05	Up	4.46472
K18009	97.6405	2.77876	0.564696	4.9208	8.62e-07	3.46e-05	Up	4.46068
K00863	915.939	1.78394	0.363419	4.90875	9.17e-07	3.6e-05	Up	4.44373
K19802	670.978	1.56885	0.31957	4.90927	9.14e-07	3.6e-05	Up	4.44373
K13296	12.286	4.85096	0.991112	4.89447	9.86e-07	3.82e-05	Up	4.41833
K06605	287.184	2.69731	0.551293	4.89269	9.95e-07	3.82e-05	Up	4.41776
K00020	1079.44	1.4954	0.305884	4.88876	1.01e-06	3.85e-05	Up	4.41505
K18851	103.456	-2.79783	0.573	-4.88278	1.05e-06	3.93e-05	Down	4.40525
K05342	200.48	-2.37771	0.487313	-4.87921	1.07e-06	3.98e-05	Down	4.40046
K09824	415.285	2.04873	0.420892	4.86758	1.13e-06	4.19e-05	Up	4.37792
K14161	19.8536	6.65761	1.36897	4.86324	1.15e-06	4.25e-05	Up	4.37142
K07217	189.748	2.31626	0.476694	4.85902	1.18e-06	4.31e-05	Up	4.36517
K00060	189.58	2.2636	0.467191	4.84512	1.27e-06	4.53e-05	Up	4.34361
K07122	84.0501	1.87478	0.387229	4.84153	1.29e-06	4.58e-05	Up	4.33868
K02486	277.592	1.70969	0.353947	4.83036	1.36e-06	4.82e-05	Up	4.31719
K13634	346.541	2.79797	0.580791	4.81751	1.45e-06	5.1e-05	Up	4.2921
K06121	165.039	2.40947	0.502154	4.79826	1.6e-06	5.58e-05	Up	4.25315
K05548	207.714	2.74632	0.572534	4.79677	1.61e-06	5.59e-05	Up	4.25278
K04021	443.318	2.21037	0.46095	4.79525	1.62e-06	5.59e-05	Up	4.25229
K07640	349.55	2.22166	0.464145	4.78657	1.7e-06	5.8e-05	Up	4.23633
K05988	3408.62	-1.93162	0.404269	-4.77805	1.77e-06	6.02e-05	Down	4.22071
K16922	691.542	-3.06634	0.64303	-4.76857	1.86e-06	6.27e-05	Down	4.20303
K06714	242.008	1.78868	0.375294	4.76609	1.88e-06	6.3e-05	Up	4.20045
K12910	735.075	-1.04245	0.218905	-4.76212	1.92e-06	6.39e-05	Down	4.19464
K16530	27.498	2.605	0.547234	4.7603	1.93e-06	6.41e-05	Up	4.19343
K11694	378.206	2.73024	0.575925	4.74061	2.13e-06	7.02e-05	Up	4.15386
K02491	1050.36	1.41237	0.298134	4.73735	2.17e-06	7.09e-05	Up	4.14956
K18303	1273.77	1.42154	0.300181	4.73562	2.18e-06	7.1e-05	Up	4.14853
K03837	366.719	2.59707	0.550561	4.71712	2.39e-06	7.69e-05	Up	4.11428
K04024	202.447	1.7121	0.36424	4.70048	2.6e-06	8.29e-05	Up	4.08145
K01959	16.5513	-3.4706	0.738851	-4.6973	2.64e-06	8.37e-05	Down	4.07729
K11750	178.482	2.98729	0.637513	4.68585	2.79e-06	8.8e-05	Up	4.05558
K15269	142.318	3.90853	0.834429	4.68407	2.81e-06	8.82e-05	Up	4.05439
K02396	3689.87	-1.29638	0.276921	-4.68139	2.85e-06	8.83e-05	Down	4.05381
K00561	7328.67	-1.18504	0.253632	-4.67227	2.98e-06	9.13e-05	Down	4.03955
K09963	300.74	1.75462	0.375481	4.67299	2.97e-06	9.13e-05	Up	4.03955
K12209	134.741	-4.40257	0.944288	-4.66232	3.13e-06	9.53e-05	Down	4.02103
K06370	60.4612	-2.59885	0.557969	-4.6577	3.2e-06	9.69e-05	Down	4.01377
K06599	50.355	4.40493	0.946157	4.6556	3.23e-06	9.73e-05	Up	4.01182
K01782	147.615	2.2465	0.48422	4.63942	3.49e-06	0.000104377	Up	3.9814
K11616	510.159	1.86301	0.401613	4.63881	3.5e-06	0.000104377	Up	3.9814
K07229	200.657	2.12808	0.460364	4.62259	3.79e-06	0.000111011	Up	3.95463
K02511	820.03	2.52228	0.546247	4.61748	3.88e-06	0.000113156	Up	3.94632
K16698	1088.99	-1.8781	0.406988	-4.61464	3.94e-06	0.00011409	Down	3.94275
K03980	1486.93	1.43134	0.310303	4.61271	3.97e-06	0.000114529	Up	3.94108
K03808	384.966	2.51212	0.544977	4.60958	4.03e-06	0.000115635	Up	3.93691
K11902	59.1719	2.96325	0.643407	4.60557	4.11e-06	0.000117256	Up	3.93087
K03895	82.0513	3.91751	0.851659	4.59986	4.23e-06	0.000119871	Up	3.92129
K19720	73.7108	3.765	0.821126	4.58516	4.54e-06	0.000127257	Up	3.89532
K09975	112.418	2.15323	0.470144	4.57994	4.65e-06	0.000129787	Up	3.88677
K06122	96.7209	2.45417	0.53635	4.57569	4.75e-06	0.000131762	Up	3.88021
K02744	376.6	1.45173	0.31777	4.56847	4.91e-06	0.000134964	Up	3.86978
K03381	59.0679	3.67112	0.8059	4.55531	5.23e-06	0.000142227	Up	3.84702
K07120	238.72	1.94484	0.427669	4.54753	5.43e-06	0.000146829	Up	3.83319
K01531	5895.56	-1.33441	0.293513	-4.54633	5.46e-06	0.000146919	Down	3.83292
K18302	555.803	1.39902	0.307812	4.54505	5.49e-06	0.000147073	Up	3.83247
K19504	237.027	1.3354	0.294293	4.53765	5.69e-06	0.000151562	Up	3.81941
K03528	351.376	2.18994	0.483088	4.53321	5.81e-06	0.00015294	Up	3.81548
K18567	40.178	4.65324	1.02662	4.53258	5.83e-06	0.00015294	Up	3.81548
K13895	204.552	1.99012	0.439312	4.53009	5.9e-06	0.000153986	Up	3.81252
K09472	185.439	2.5629	0.567372	4.51715	6.27e-06	0.000162898	Up	3.78808
K16149	70.7159	-5.53003	1.2256	-4.5121	6.42e-06	0.000166014	Down	3.77986
K13668	1256.23	-2.18097	0.485576	-4.49152	7.07e-06	0.000180263	Down	3.74409
K02475	377.949	1.55374	0.346369	4.48579	7.26e-06	0.00018429	Up	3.7345
K01706	578.948	1.77853	0.397189	4.47779	7.54e-06	0.000189518	Up	3.72235
K07495	45942.2	-2.01676	0.450337	-4.47833	7.52e-06	0.000189518	Down	3.72235
K13922	34.5956	3.06793	0.685842	4.47323	7.7e-06	0.000192689	Up	3.71514
K02444	463.064	1.24203	0.277753	4.47169	7.76e-06	0.000193172	Up	3.71406
K06237	626.823	-2.05229	0.459234	-4.46895	7.86e-06	0.000194748	Down	3.71053
K03597	92.5918	2.7832	0.623098	4.4667	7.94e-06	0.000195887	Up	3.70799
K07177	162.727	2.34258	0.52499	4.46213	8.11e-06	0.000197361	Up	3.70474
K12981	87.7538	3.76451	0.843517	4.46288	8.09e-06	0.000197361	Up	3.70474
K06915	5993.96	-1.63461	0.366825	-4.45609	8.35e-06	0.000202073	Down	3.69449
K18354	58.7469	3.08075	0.691593	4.45457	8.41e-06	0.000202586	Up	3.69339
K07708	242.96	1.95931	0.440813	4.44476	8.8e-06	0.000211098	Up	3.67551
K07749	539.263	1.67671	0.377607	4.44037	8.98e-06	0.000212632	Up	3.67237
K08714	20.084	-7.08312	1.59514	-4.44044	8.98e-06	0.000212632	Down	3.67237
K18997	34.9437	2.25388	0.507595	4.4403	8.98e-06	0.000212632	Up	3.67237
K02007	565.318	1.07699	0.242636	4.43868	9.05e-06	0.000213284	Up	3.67104
K11467	20.7679	-3.94369	0.893333	-4.41458	1.01e-05	0.000237431	Down	3.62446
K16371	397.347	1.5713	0.356942	4.40212	1.07e-05	0.000250377	Up	3.60141
K03647	147.247	2.00242	0.456232	4.38904	1.14e-05	0.000261759	Up	3.5821
K07787	999.635	1.65836	0.378406	4.38248	1.17e-05	0.00026815	Up	3.57162
K19047	27.3691	3.68179	0.841052	4.37761	1.2e-05	0.000273041	Up	3.56377
K08589	1051.74	-3.04151	0.695021	-4.37615	1.21e-05	0.000273701	Down	3.56272
K02798	1395.3	1.44701	0.331283	4.3679	1.25e-05	0.00027861	Up	3.555
K08680	204.719	2.01818	0.462018	4.36818	1.25e-05	0.00027861	Up	3.555
K09891	92.6385	2.62495	0.600809	4.36903	1.25e-05	0.00027861	Up	3.555
K13308	1846.35	-1.76378	0.403829	-4.36765	1.26e-05	0.00027861	Down	3.555
K13256	140.417	1.83226	0.419614	4.36655	1.26e-05	0.000278853	Up	3.55462
K15256	307.7	2.04093	0.468354	4.35766	1.31e-05	0.000286835	Up	3.54237
K06181	137.533	1.97279	0.45336	4.35148	1.35e-05	0.000292252	Up	3.53424
K07006	148.895	1.60121	0.368064	4.35037	1.36e-05	0.000292252	Up	3.53424
K09159	47.2628	2.41349	0.554828	4.34998	1.36e-05	0.000292252	Up	3.53424
K09762	3749.45	-1.02783	0.236163	-4.3522	1.35e-05	0.000292252	Down	3.53424
K02462	142.451	2.49417	0.575299	4.33543	1.45e-05	0.000309757	Up	3.50898
K05819	541.647	2.31108	0.533054	4.33556	1.45e-05	0.000309757	Up	3.50898
K05841	155.417	2.31878	0.53605	4.32568	1.52e-05	0.000319934	Up	3.49494
K07678	410.381	2.14308	0.495355	4.32634	1.52e-05	0.000319934	Up	3.49494
K07482	10117.9	-1.65076	0.383207	-4.30774	1.65e-05	0.000344888	Down	3.46232
K09984	9.81022	4.39066	1.01934	4.30735	1.65e-05	0.000344888	Up	3.46232
K09900	47.4037	2.44613	0.568474	4.30297	1.69e-05	0.00035039	Up	3.45545
K02769	211.368	1.51386	0.35231	4.29694	1.73e-05	0.000355417	Up	3.44926
K03367	378.211	-2.00929	0.467673	-4.29637	1.74e-05	0.000355417	Down	3.44926
K03549	5.49794	5.29973	1.23312	4.29781	1.72e-05	0.000355417	Up	3.44926
K05802	1392.87	1.87019	0.436126	4.28819	1.8e-05	0.000365927	Up	3.43661
K02331	12.3187	-6.31696	1.47383	-4.28609	1.82e-05	0.000367994	Down	3.43416
K12516	148.621	3.24074	0.756574	4.28344	1.84e-05	0.000369586	Up	3.43228
K03591	210.677	2.26316	0.529186	4.27668	1.9e-05	0.000379539	Up	3.42074
K00141	112.104	3.76637	0.882207	4.26926	1.96e-05	0.000389359	Up	3.40965
K05995	5255.73	-1.04165	0.243943	-4.27006	1.95e-05	0.000389359	Down	3.40965
K08139	173.543	1.95353	0.457663	4.26848	1.97e-05	0.000389359	Up	3.40965
K06929	112.411	1.69364	0.396951	4.26663	1.98e-05	0.000391142	Up	3.40767
K02466	119.487	2.0112	0.471607	4.26456	2e-05	0.000393325	Up	3.40525
K11177	69.7547	2.69676	0.632966	4.26052	2.04e-05	0.000399028	Up	3.399
K04565	137.196	1.72191	0.404247	4.25956	2.05e-05	0.000399272	Up	3.39873
K19002	1090.67	-1.67842	0.394414	-4.25548	2.09e-05	0.000400717	Down	3.39716
K03578	1078.51	1.57949	0.371556	4.25101	2.13e-05	0.000405382	Up	3.39214
K06328	12.5758	-2.82975	0.666668	-4.24461	2.19e-05	0.000414636	Down	3.38233
K10546	303.715	1.58101	0.372879	4.24002	2.24e-05	0.000420213	Up	3.37653
K07115	233.67	1.75363	0.413695	4.23894	2.25e-05	0.000420742	Up	3.37598
K05851	320.922	2.26875	0.535768	4.23457	2.29e-05	0.000427496	Up	3.36907
K05775	140.857	2.76947	0.654703	4.23011	2.34e-05	0.000434527	Up	3.36198
K00116	315.109	2.05418	0.48616	4.22532	2.39e-05	0.000436238	Up	3.36028
K03688	1261.19	1.02987	0.243613	4.2275	2.36e-05	0.000436238	Up	3.36028
K03146	425.492	-2.70835	0.642986	-4.21214	2.53e-05	0.000460903	Down	3.33639
K14192	16.5307	-2.83709	0.673735	-4.21099	2.54e-05	0.000461654	Down	3.33568
K03732	596.106	2.02085	0.48039	4.20668	2.59e-05	0.000468938	Up	3.32888
K01427	10.9441	3.47214	0.825648	4.20536	2.61e-05	0.000470095	Up	3.32781
K00990	726.036	1.60096	0.381524	4.19622	2.71e-05	0.000484518	Up	3.31469
K02526	371.196	1.3932	0.33199	4.1965	2.71e-05	0.000484518	Up	3.31469
K03336	530.738	1.14418	0.272802	4.19417	2.74e-05	0.000487267	Up	3.31223
K02532	1295.31	2.0015	0.477587	4.19087	2.78e-05	0.00049277	Up	3.30736
K02062	129.643	1.83944	0.439007	4.18999	2.79e-05	0.000493025	Up	3.30713
K01595	933.878	1.49263	0.356576	4.18601	2.84e-05	0.000499109	Up	3.30181
K05692	151.029	-2.2758	0.543709	-4.1857	2.84e-05	0.000499109	Down	3.30181
K07783	452.203	2.20519	0.528944	4.16904	3.06e-05	0.000528285	Up	3.27713
K02545	29.0538	-1.84107	0.442434	-4.16123	3.17e-05	0.000543123	Down	3.2651
K09898	22.9558	2.63463	0.635041	4.14875	3.34e-05	0.00056335	Up	3.24922
K19223	55.3817	-3.71743	0.896095	-4.14848	3.35e-05	0.00056335	Down	3.24922
K10000	33.7671	2.58464	0.623425	4.14587	3.39e-05	0.000567998	Up	3.24565
K19506	34.6867	1.66589	0.401996	4.14404	3.41e-05	0.000570734	Up	3.24357
K15856	6.52165	-4.68924	1.1326	-4.14024	3.47e-05	0.000575405	Down	3.24003
K02795	1535.86	1.12588	0.272025	4.13891	3.49e-05	0.000576391	Up	3.23928
K00109	224.731	1.67523	0.405281	4.13351	3.57e-05	0.000585638	Up	3.23237
K04029	225.558	1.41764	0.343016	4.13286	3.58e-05	0.000585638	Up	3.23237
K18372	84.4946	-2.32148	0.561774	-4.13241	3.59e-05	0.000585638	Down	3.23237
K10917	7.07752	3.63255	0.882049	4.11832	3.82e-05	0.000616927	Up	3.20977
K03566	738.107	2.13199	0.517849	4.117	3.84e-05	0.000618558	Up	3.20862
K19167	385.798	-1.37814	0.334961	-4.11434	3.88e-05	0.000623855	Down	3.20492
K01035	27.0895	1.84679	0.449936	4.10456	4.05e-05	0.000639227	Up	3.19434
K03475	128.287	2.43546	0.592897	4.10773	4e-05	0.000639227	Up	3.19434
K05873	37.7585	-2.00579	0.488637	-4.10487	4.05e-05	0.000639227	Down	3.19434
K19228	73.1517	2.09733	0.51092	4.105	4.04e-05	0.000639227	Up	3.19434
K04478	2667.13	-1.21491	0.296183	-4.10191	4.1e-05	0.000644186	Down	3.19099
K11748	99.8252	2.38617	0.582788	4.09439	4.23e-05	0.000660059	Up	3.18042
K00685	26.8804	4.67975	1.14457	4.08866	4.34e-05	0.000668713	Up	3.17476
K16090	219.677	2.71391	0.664065	4.08682	4.37e-05	0.000671595	Up	3.17289
K12994	193.628	2.94768	0.721727	4.0842	4.42e-05	0.000673995	Up	3.17134
K13688	461.08	-2.67139	0.654088	-4.08415	4.42e-05	0.000673995	Down	3.17134
K00101	437.6	1.59938	0.391843	4.08169	4.47e-05	0.000679227	Up	3.16799
K01753	687.533	1.32033	0.323598	4.08016	4.5e-05	0.00068015	Up	3.1674
K16260	13.5575	5.30079	1.2992	4.08005	4.5e-05	0.00068015	Up	3.1674
K00476	76.5525	3.98994	0.978861	4.07611	4.58e-05	0.000687841	Up	3.16251
K03117	374.425	1.11801	0.27427	4.0763	4.58e-05	0.000687841	Up	3.16251
K07798	457.027	1.40397	0.344518	4.07516	4.6e-05	0.000688314	Up	3.16221
K08162	341.579	2.07398	0.510058	4.06616	4.78e-05	0.000709814	Up	3.14886
K06074	103.101	2.5044	0.616475	4.06245	4.86e-05	0.000719193	Up	3.14315
K01208	1137.13	-1.16711	0.287565	-4.05858	4.94e-05	0.00072514	Down	3.13958
K09475	689.219	1.9573	0.482248	4.05871	4.93e-05	0.00072514	Up	3.13958
K13921	152.906	1.62591	0.400841	4.05624	4.99e-05	0.000729305	Up	3.13709
K03314	301.004	2.26726	0.559649	4.05121	5.1e-05	0.000740558	Up	3.13044
K03430	1856.19	-1.66138	0.410434	-4.04785	5.17e-05	0.000748787	Down	3.12564
K04099	64.9827	3.81581	0.943672	4.04358	5.26e-05	0.000758443	Up	3.12008
K03762	1272.9	1.8494	0.458056	4.03749	5.4e-05	0.000774171	Up	3.11116
K11443	47.9213	2.55124	0.631861	4.03765	5.4e-05	0.000774171	Up	3.11116
K06910	334.949	1.54156	0.382158	4.03384	5.49e-05	0.000784191	Up	3.10558
K08219	215.195	2.53454	0.628505	4.03265	5.52e-05	0.000786067	Up	3.10454
K07608	186.204	-3.5455	0.880678	-4.02587	5.68e-05	0.000804721	Down	3.09435
K11932	170.973	2.6572	0.660019	4.02595	5.67e-05	0.000804721	Up	3.09435
K06152	59.5077	2.84246	0.70796	4.015	5.94e-05	0.000832002	Up	3.07988
K07782	102.598	2.52527	0.629035	4.01451	5.96e-05	0.000832002	Up	3.07988
K09667	18.2503	3.48245	0.867519	4.01427	5.96e-05	0.000832002	Up	3.07988
K14680	14.9075	-4.68859	1.1688	-4.01145	6.03e-05	0.000837579	Down	3.07697
K02476	841.259	1.34983	0.336583	4.01038	6.06e-05	0.000839186	Up	3.07614
K02472	2430.76	-1.6281	0.406527	-4.0049	6.2e-05	0.000856667	Down	3.06719
K00055	71.4663	3.60601	0.900883	4.00275	6.26e-05	0.000859113	Up	3.06595
K03290	207.593	2.13021	0.53219	4.00272	6.26e-05	0.000859113	Up	3.06595
K04103	148.137	3.13845	0.784145	4.00238	6.27e-05	0.000859113	Up	3.06595
K19333	204.605	1.61352	0.403303	4.00076	6.31e-05	0.000862809	Up	3.06409
K00984	749.346	2.08329	0.52171	3.99319	6.52e-05	0.000888523	Up	3.05133
K03192	4.84002	5.47968	1.37258	3.99225	6.54e-05	0.000889775	Up	3.05072
K12149	57.2418	2.59853	0.652756	3.98086	6.87e-05	0.000931109	Up	3.031
K18015	36.0394	3.33216	0.837233	3.97997	6.89e-05	0.000932221	Up	3.03048
K03240	27.9741	-3.36156	0.845381	-3.97638	7e-05	0.000942805	Down	3.02558
K00851	2134.85	1.47542	0.371528	3.97121	7.15e-05	0.000954577	Up	3.02019
K05593	1673.18	-2.30016	0.579281	-3.97072	7.17e-05	0.000954577	Down	3.02019
K07344	197.575	3.16855	0.798706	3.9671	7.28e-05	0.000963561	Up	3.01612
K11928	657.308	1.80983	0.456255	3.9667	7.29e-05	0.000963561	Up	3.01612
K04568	208.035	2.33431	0.589344	3.96086	7.47e-05	0.000982524	Up	3.00766
K02839	100.795	1.98264	0.501574	3.95285	7.72e-05	0.00100852	Up	2.99631
K06143	518.643	1.47494	0.373362	3.95042	7.8e-05	0.00101133	Up	2.99511
K00007	154.873	3.10647	0.787337	3.94553	7.96e-05	0.00102795	Up	2.98803
K16560	1095.48	-1.8037	0.457171	-3.94535	7.97e-05	0.00102795	Down	2.98803
K07592	289.532	1.80126	0.457039	3.94114	8.11e-05	0.00104107	Up	2.98252
K04067	128.985	2.04954	0.520441	3.93808	8.21e-05	0.00104934	Up	2.97908
K04094	77.2282	-3.00554	0.763162	-3.93827	8.21e-05	0.00104934	Down	2.97908
K15580	2980.21	1.00507	0.255892	3.9277	8.58e-05	0.00108524	Up	2.96447
K03777	211.906	2.29955	0.585713	3.92606	8.63e-05	0.00109003	Up	2.96256
K00132	414.32	1.22132	0.311225	3.92423	8.7e-05	0.00109354	Up	2.96117
K02773	304.822	1.6552	0.421797	3.92415	8.7e-05	0.00109354	Up	2.96117
K07161	35.1277	-2.82549	0.722579	-3.91028	9.22e-05	0.00115008	Down	2.93927
K00835	191.72	2.21124	0.565944	3.90717	9.34e-05	0.00115955	Up	2.93571
K06176	311.346	1.4621	0.374895	3.90004	9.62e-05	0.00118866	Up	2.92494
K00118	209.506	1.50873	0.387404	3.89447	9.84e-05	0.00120953	Up	2.91738
K11786	9.19891	-3.87256	0.994461	-3.89413	9.86e-05	0.00120953	Down	2.91738
K09923	65.6341	1.94699	0.500295	3.89168	9.96e-05	0.00121899	Up	2.914
K13816	5.63111	6.36422	1.63576	3.89068	0.0001	0.00122123	Up	2.9132
K19233	46.8244	3.70031	0.953185	3.88205	0.000103579	0.0012567	Up	2.90077
K03288	163.26	3.31392	0.853924	3.88082	0.000104106	0.0012599	Up	2.89967
K08365	175.894	1.91306	0.493015	3.88032	0.000104318	0.0012599	Up	2.89967
K16050	59.9985	3.59064	0.926125	3.87706	0.000105727	0.00127401	Up	2.89483
K12957	148.376	2.3459	0.605189	3.87631	0.000106053	0.00127505	Up	2.89447
K00009	903.363	1.37188	0.354153	3.8737	0.000107195	0.00128586	Up	2.89081
K04062	20.1094	2.20859	0.570667	3.87018	0.000108753	0.00129867	Up	2.8865
K09021	51.8088	1.93907	0.501137	3.86934	0.00010913	0.00130024	Up	2.88598
K03776	5.1715	4.9095	1.27057	3.86401	0.000111542	0.00132115	Up	2.87905
K13979	183.875	2.5342	0.655881	3.86381	0.000111632	0.00132115	Up	2.87905
K15013	60.0126	-2.98212	0.772096	-3.86238	0.00011229	0.00132597	Down	2.87747
K12206	38.8123	2.84348	0.737045	3.85794	0.000114347	0.00134428	Up	2.87151
K00073	227.919	1.77998	0.461529	3.85669	0.000114932	0.00134519	Up	2.87122
K05825	1024.49	1.0366	0.268757	3.857	0.000114786	0.00134519	Up	2.87122
K11744	391.336	2.15923	0.560267	3.85393	0.000116236	0.00135745	Up	2.86728
K11742	119.659	1.63178	0.424566	3.84341	0.000121336	0.00140464	Up	2.85244
K04653	203.744	1.05019	0.273319	3.84237	0.000121852	0.00140754	Up	2.85154
K05922	869.233	1.89229	0.493577	3.83382	0.000126168	0.0014355	Up	2.843
K19710	11.3389	2.04359	0.532977	3.83428	0.000125931	0.0014355	Up	2.843
K01699	308.874	1.53891	0.401674	3.83125	0.000127493	0.00144437	Up	2.84032
K06296	16.7867	-3.75366	0.980425	-3.8286	0.000128873	0.00145071	Down	2.83842
K06893	53.6447	3.23191	0.844067	3.82897	0.000128678	0.00145071	Up	2.83842
K14055	155.431	2.17109	0.567367	3.8266	0.000129926	0.00145638	Up	2.83672
K00184	80.058	2.28051	0.597272	3.81821	0.000134425	0.00147856	Up	2.83016
K04063	65.3838	1.76978	0.463456	3.81867	0.000134175	0.00147856	Up	2.83016
K05939	122.3	2.68183	0.701803	3.82135	0.000132723	0.00147856	Up	2.83016
K07251	123.856	2.34804	0.614554	3.82072	0.000133061	0.00147856	Up	2.83016
K07689	126.572	1.83618	0.480833	3.81875	0.000134129	0.00147856	Up	2.83016
K08990	154.708	1.77719	0.46551	3.81771	0.000134694	0.00147856	Up	2.83016
K12975	30.4842	6.69232	1.75244	3.81886	0.000134068	0.00147856	Up	2.83016
K01617	292.335	1.96252	0.514575	3.81386	0.000136812	0.00149871	Up	2.82428
K19803	129.812	1.97136	0.516966	3.81334	0.000137103	0.00149881	Up	2.82425
K01175	175.081	1.36394	0.357854	3.81144	0.00013816	0.00150726	Up	2.82181
K13794	68.5756	2.11979	0.556543	3.80885	0.000139615	0.00151999	Up	2.81816
K04076	67.9228	-2.20461	0.579452	-3.80464	0.000142011	0.00154292	Down	2.81166
K00228	632.74	1.3118	0.344975	3.80258	0.000143196	0.00154638	Up	2.81068
K11102	178.885	2.34508	0.616734	3.80241	0.000143292	0.00154638	Up	2.81068
K20023	306.627	1.72272	0.453047	3.80252	0.000143231	0.00154638	Up	2.81068
K13923	72.2947	2.64379	0.696385	3.79645	0.00014678	0.00157536	Up	2.80262
K00117	458.14	1.85626	0.489063	3.79553	0.000147328	0.00157805	Up	2.80188
K00433	377.81	1.13164	0.298269	3.79404	0.000148215	0.00158434	Up	2.80015
K09798	413.933	1.16405	0.307037	3.79124	0.0001499	0.00159704	Up	2.79668
K03974	143.455	2.55519	0.675007	3.78543	0.000153443	0.00163037	Up	2.78771
K05549	34.5383	2.99721	0.791934	3.78467	0.000153915	0.00163076	Up	2.78761
K18650	701.625	1.40564	0.371432	3.78438	0.000154095	0.00163076	Up	2.78761
K00370	1606.42	1.53944	0.407163	3.7809	0.00015626	0.00165038	Up	2.78242
K09781	163.518	2.20631	0.58401	3.77787	0.000158175	0.00166425	Up	2.77878
K19160	21.2484	3.66306	0.969619	3.77783	0.000158201	0.00166425	Up	2.77878
K07268	157.587	1.98481	0.525486	3.77709	0.000158669	0.00166586	Up	2.77836
K03164	7.29146	-7.79815	2.06549	-3.77545	0.000159719	0.00167358	Down	2.77635
K03079	400.747	1.65689	0.439164	3.77284	0.000161401	0.00168786	Up	2.77266
K15722	17.568	2.73863	0.726097	3.77171	0.000162132	0.00169218	Up	2.77155
K06136	67.3011	3.18475	0.844603	3.77071	0.000162786	0.00169233	Up	2.77151
K03490	176.933	1.70164	0.451721	3.76701	0.000165216	0.00170093	Up	2.76931
K09921	184.485	1.91914	0.509739	3.76494	0.000166586	0.00170999	Up	2.76701
K07480	1283.1	2.45926	0.654157	3.75943	0.000170298	0.00173973	Up	2.75952
K01026	676.363	1.18872	0.316403	3.75698	0.000171976	0.00174833	Up	2.75738
K02167	98.1551	2.36003	0.628316	3.75612	0.000172567	0.00174833	Up	2.75738
K03645	108.532	2.21878	0.590835	3.75532	0.000173118	0.00174833	Up	2.75738
K09890	40.5597	2.34199	0.623545	3.75593	0.000172702	0.00174833	Up	2.75738
K16839	88.7282	2.98376	0.794514	3.75545	0.000173029	0.00174833	Up	2.75738
K02745	424.362	1.31504	0.350558	3.75128	0.000175935	0.00177339	Up	2.75119
K15598	269.665	1.01293	0.27022	3.74855	0.000177862	0.00178265	Up	2.74893
K03683	103.519	2.2125	0.590638	3.74596	0.000179707	0.00179535	Up	2.74585
K07153	94.9471	2.22893	0.595195	3.74487	0.000180487	0.00179877	Up	2.74503
K09771	65.9053	1.9651	0.52605	3.73559	0.000187279	0.00185382	Up	2.73193
K18491	5.15029	-5.34992	1.43241	-3.73491	0.00018778	0.00185382	Down	2.73193
K02362	201.113	2.5735	0.689582	3.73197	0.000189987	0.00186885	Up	2.72843
K02180	155.88	-2.00152	0.536482	-3.73083	0.000190852	0.00187389	Down	2.72726
K00483	348.918	1.19178	0.319676	3.72809	0.00019294	0.00188739	Up	2.72414
K06956	1585.91	1.1523	0.309077	3.72819	0.000192858	0.00188739	Up	2.72414
K18700	17.5455	1.62594	0.43635	3.72624	0.000194359	0.00189777	Up	2.72176
K19230	69.9956	2.38772	0.64158	3.72162	0.00019795	0.00192928	Up	2.7146
K05952	18.6153	2.82461	0.759604	3.71853	0.000200385	0.00194943	Up	2.71009
K02623	138.794	2.27123	0.611388	3.71487	0.000203309	0.00196175	Up	2.70736
K07401	24.5267	3.58007	0.96389	3.71419	0.000203858	0.00196175	Up	2.70736
K13639	103.07	2.6187	0.704807	3.71548	0.000202819	0.00196175	Up	2.70736
K05879	823.209	1.21118	0.326271	3.71218	0.000205478	0.00197363	Up	2.70473
K05816	130.79	2.67032	0.719829	3.70966	0.000207534	0.00197904	Up	2.70355
K12217	26.8851	2.64541	0.713036	3.71006	0.000207208	0.00197904	Up	2.70355
K19577	340.192	1.97774	0.532963	3.71083	0.000206578	0.00197904	Up	2.70355
K19776	125.896	2.40804	0.649081	3.70992	0.000207327	0.00197904	Up	2.70355
K06077	72.4314	1.71166	0.461524	3.70871	0.000208315	0.00198292	Up	2.7027
K09911	45.5182	2.72979	0.737341	3.70221	0.000213726	0.00202353	Up	2.69389
K01679	1444.85	1.05813	0.285995	3.69983	0.000215742	0.00203535	Up	2.69136
K02742	84.615	2.29817	0.621092	3.70022	0.000215417	0.00203535	Up	2.69136
K03318	188.409	2.22394	0.601424	3.69779	0.000217486	0.00204337	Up	2.68965
K03747	49.7473	2.69305	0.728435	3.69703	0.000218134	0.00204337	Up	2.68965
K14051	282.039	2.18882	0.592037	3.6971	0.000218074	0.00204337	Up	2.68965
K05882	395.064	2.01098	0.54478	3.69136	0.000223059	0.00207849	Up	2.68225
K00256	68.4162	2.07083	0.561362	3.68895	0.000225183	0.00209093	Up	2.67966
K01716	81.8533	2.10188	0.570882	3.6818	0.000231589	0.00214291	Up	2.669
K16651	308.417	1.53183	0.416235	3.68019	0.000233056	0.00215272	Up	2.66701
K00462	26.4776	3.58928	0.975794	3.67832	0.000234776	0.00216108	Up	2.66533
K00371	663.353	1.6549	0.449983	3.67769	0.000235355	0.00216265	Up	2.66501
K07136	45.2146	2.61562	0.711339	3.67704	0.000235953	0.0021644	Up	2.66466
K02746	387.588	1.22713	0.333808	3.67615	0.00023678	0.00216824	Up	2.66389
K08475	122.038	3.25401	0.885402	3.67517	0.000237689	0.0021728	Up	2.66298
K14056	143.383	1.37451	0.374103	3.67414	0.000238653	0.00217786	Up	2.66197
K01247	234.496	1.5046	0.409854	3.67107	0.000241538	0.00219663	Up	2.65824
K03573	156.99	1.9683	0.536311	3.67006	0.000242489	0.0022015	Up	2.65728
K03638	97.009	1.79445	0.489414	3.66653	0.000245861	0.00222632	Up	2.65241
K16710	1185.32	-1.48451	0.405246	-3.66324	0.00024905	0.00224187	Down	2.64939
K10260	13.9276	2.04685	0.558936	3.66205	0.000250202	0.00224842	Up	2.64812
K07345	1130.77	1.85294	0.506045	3.66162	0.000250629	0.00224845	Up	2.64812
K02192	30.8425	1.76358	0.48182	3.66026	0.000251961	0.00225659	Up	2.64655
K07168	62.4462	2.22907	0.609306	3.65837	0.000253824	0.00226849	Up	2.64426
K15268	130.398	2.22232	0.607641	3.65729	0.000254898	0.00227137	Up	2.64371
K13636	148.847	2.31992	0.635375	3.65126	0.000260961	0.00231762	Up	2.63496
K01087	114.227	2.42293	0.663973	3.64914	0.000263124	0.00233291	Up	2.6321
K07991	57.3256	-3.7033	1.01604	-3.64482	0.000267579	0.00236057	Down	2.62698
K01085	574.334	1.54368	0.423796	3.64252	0.000269983	0.00237388	Up	2.62454
K15539	526.494	1.10041	0.302088	3.64266	0.000269835	0.00237388	Up	2.62454
K03337	465.269	1.2523	0.344141	3.63892	0.000273785	0.00239752	Up	2.62024
K07160	438.446	1.11718	0.307136	3.63742	0.000275384	0.00240541	Up	2.61881
K05527	87.6847	2.13444	0.587177	3.63508	0.000277896	0.00241939	Up	2.61629
K14480	155.681	-6.16113	1.69483	-3.63525	0.00027771	0.00241939	Down	2.61629
K05984	128.645	2.26381	0.622987	3.6338	0.000279278	0.00242742	Up	2.61486
K14194	161.714	-1.72407	0.474508	-3.63338	0.000279734	0.00242742	Down	2.61486
K14393	304.643	1.79764	0.495705	3.62643	0.000287365	0.0024795	Up	2.60564
K19174	12.9591	-3.78607	1.04408	-3.62621	0.000287607	0.0024795	Down	2.60564
K05803	187.807	2.12655	0.58711	3.62207	0.000292258	0.00251143	Up	2.60008
K01407	610.689	1.6856	0.465862	3.61823	0.000296627	0.00253664	Up	2.59574
K16321	57.5	3.03305	0.839034	3.61493	0.000300434	0.00256093	Up	2.5916
K09897	61.2851	2.23238	0.618325	3.61037	0.000305763	0.00258779	Up	2.58707
K07676	329.743	2.46391	0.682728	3.60892	0.000307472	0.00259589	Up	2.58571
K12686	136.68	4.42958	1.2284	3.60598	0.000310981	0.00262133	Up	2.58148
K03788	143.912	2.20597	0.611837	3.60549	0.000311559	0.00262204	Up	2.58136
K09915	103.842	2.2943	0.636434	3.60493	0.000312239	0.0026236	Up	2.5811
K16936	97.2927	2.16245	0.600221	3.60276	0.000314852	0.00264137	Up	2.57817
K03464	20.0667	3.55624	0.987791	3.60019	0.000317979	0.00266339	Up	2.57457
K01484	240.786	2.15507	0.598885	3.59848	0.000320083	0.00267678	Up	2.57239
K02521	395.717	1.61614	0.449394	3.59627	0.000322816	0.00269539	Up	2.56938
K02471	652.876	1.43027	0.398482	3.5893	0.000331568	0.00275358	Up	2.5601
K03317	827.754	1.25483	0.349592	3.58942	0.000331414	0.00275358	Up	2.5601
K03782	321.292	1.69873	0.473306	3.58907	0.00033186	0.00275358	Up	2.5601
K04025	77.5134	1.94763	0.542656	3.58907	0.000331863	0.00275358	Up	2.5601
K02560	144.76	2.14196	0.596914	3.58839	0.00033273	0.00275646	Up	2.55965
K03598	224.076	1.68056	0.468453	3.58747	0.000333905	0.00276188	Up	2.5588
K00039	43.145	3.21989	0.897979	3.5857	0.000336174	0.00277631	Up	2.55653
K00574	630.283	1.19803	0.334583	3.58066	0.000342731	0.0028173	Up	2.55017
K03674	36.0495	2.1998	0.614323	3.58085	0.000342473	0.0028173	Up	2.55017
K03841	200.383	1.65228	0.46157	3.5797	0.000343987	0.00282325	Up	2.54925
K09945	53.5109	2.75147	0.76872	3.57929	0.000344531	0.00282334	Up	2.54924
K00883	384.35	1.40695	0.393155	3.57861	0.000345422	0.00282627	Up	2.54879
K04774	133.474	1.9352	0.541297	3.57511	0.000350076	0.00285555	Up	2.54431
K07443	117.427	1.20638	0.337677	3.57259	0.000353462	0.00287873	Up	2.5408
K04031	175.301	1.13965	0.319058	3.57193	0.000354359	0.00288162	Up	2.54036
K03896	19.4793	3.35311	0.938898	3.57133	0.000355173	0.00288381	Up	2.54003
K06218	228.908	1.27715	0.357767	3.56979	0.000357272	0.0028897	Up	2.53915
K12682	247.526	2.40359	0.673989	3.56622	0.000362174	0.00290679	Up	2.53659
K18305	15.986	5.07615	1.42329	3.5665	0.000361785	0.00290679	Up	2.53659
K08643	5.78247	-4.3207	1.21209	-3.56466	0.000364333	0.00291797	Down	2.53492
K05997	117.756	1.60042	0.449222	3.56265	0.000367132	0.00293595	Up	2.53225
K03735	401.403	1.21646	0.341531	3.56178	0.000368348	0.00294123	Up	2.53147
K05580	140.244	2.06807	0.581296	3.55769	0.000374134	0.00298294	Up	2.52535
K03805	166.7	1.98068	0.556891	3.55667	0.000375583	0.00299	Up	2.52433
K03716	458.307	-1.286	0.361899	-3.55349	0.00038016	0.00299728	Down	2.52327
K05774	119.114	2.07105	0.582854	3.55328	0.000380455	0.00299728	Up	2.52327
K05818	110.041	2.42824	0.683111	3.55467	0.000378449	0.00299728	Up	2.52327
K07156	74.7378	2.68364	0.755006	3.55447	0.000378745	0.00299728	Up	2.52327
K09800	2704.95	1.01099	0.28447	3.55392	0.000379528	0.00299728	Up	2.52327
K14392	613.514	1.43861	0.404759	3.55424	0.000379074	0.00299728	Up	2.52327
K07132	2878.73	-1.48306	0.418034	-3.5477	0.00038861	0.00303367	Down	2.51803
K13006	146.845	-1.87678	0.528815	-3.54903	0.000386653	0.00303367	Down	2.51803
K19170	635.536	-2.22519	0.627209	-3.54776	0.000388515	0.00303367	Down	2.51803
K00285	348.504	1.3335	0.376154	3.5451	0.000392465	0.0030511	Up	2.51554
K01419	248.902	1.21787	0.343689	3.54353	0.000394809	0.00306483	Up	2.51359
K05796	144.063	2.11603	0.597498	3.54148	0.000397882	0.00307966	Up	2.5115
K07146	127.985	2.07367	0.586613	3.53499	0.000407792	0.00314718	Up	2.50208
K18446	259.651	1.51812	0.429455	3.53501	0.000407767	0.00314718	Up	2.50208
K06918	243.943	1.69377	0.479328	3.53364	0.000409877	0.00315867	Up	2.5005
K15735	139.65	1.7449	0.494288	3.53013	0.000415348	0.00319619	Up	2.49537
K15777	214.273	1.84109	0.521889	3.52773	0.000419137	0.00322068	Up	2.49205
K06151	129.475	1.73179	0.49117	3.52586	0.000422116	0.00323419	Up	2.49023
K10016	233.565	1.44558	0.410203	3.52405	0.000424997	0.00325156	Up	2.48791
K07358	98.915	2.65585	0.754098	3.52189	0.000428484	0.00326412	Up	2.48623
K02196	22.2171	2.3155	0.657718	3.52051	0.000430719	0.00327022	Up	2.48542
K06219	99.0691	2.63034	0.7471	3.52073	0.000430354	0.00327022	Up	2.48542
K08687	5.60239	-4.40071	1.25025	-3.51987	0.000431754	0.00327022	Down	2.48542
K19956	10.5406	2.13144	0.60551	3.52008	0.000431415	0.00327022	Up	2.48542
K10751	15.467	2.64456	0.751908	3.51713	0.000436246	0.00329836	Up	2.4817
K15896	46.4071	-2.54815	0.724606	-3.5166	0.000437113	0.00329836	Down	2.4817
K06164	250.13	1.41608	0.403857	3.5064	0.000454209	0.00340668	Up	2.46767
K16013	202.861	2.11511	0.603482	3.50484	0.000456884	0.00341664	Up	2.4664
K15550	325.272	2.29989	0.656296	3.50434	0.000457736	0.00341819	Up	2.4662
K15257	115.35	2.11779	0.604402	3.50394	0.000458435	0.0034186	Up	2.46615
K06916	306.312	2.2891	0.65353	3.50267	0.000460613	0.00343001	Up	2.4647
K03620	434.926	1.55976	0.445673	3.49978	0.000465637	0.00346256	Up	2.4606
K19428	6.42637	-3.30979	0.946881	-3.49546	0.000473241	0.00350926	Down	2.45478
K01317	20.0919	-2.66063	0.76127	-3.49499	0.000474076	0.00351055	Down	2.45463
K06045	42.8589	3.16318	0.905502	3.49328	0.000477122	0.00352817	Up	2.45245
K00389	82.5021	2.06227	0.590671	3.49139	0.000480511	0.00354829	Up	2.44998
K01011	601.948	1.47754	0.423424	3.48951	0.000483899	0.00356833	Up	2.44753
K02043	427.938	1.85898	0.532923	3.48827	0.000486165	0.0035751	Up	2.44671
K12963	54.6675	2.17447	0.62376	3.48606	0.000490184	0.00359468	Up	2.44434
K07336	86.5532	2.43044	0.697777	3.48312	0.000495604	0.00361825	Up	2.4415
K08992	38.6761	2.14214	0.615055	3.48284	0.000496121	0.00361825	Up	2.4415
K11531	93.5889	3.19686	0.917891	3.48284	0.000496127	0.00361825	Up	2.4415
K03607	114.956	2.1401	0.614673	3.48168	0.000498279	0.00362895	Up	2.44022
K03280	4.68742	3.9463	1.13519	3.47634	0.000508309	0.00368681	Up	2.43335
K07659	232.929	1.9905	0.572781	3.47515	0.000510567	0.00369813	Up	2.43202
K19353	6307.41	-1.29075	0.371747	-3.47211	0.000516379	0.00372496	Down	2.42888
K18140	128.332	2.48038	0.715015	3.46898	0.000522434	0.00375841	Up	2.425
K12997	1601.85	-1.50536	0.434011	-3.46848	0.000523404	0.00376028	Down	2.42478
K09930	23.0391	2.83712	0.818478	3.46633	0.000527616	0.00378542	Up	2.42189
K11070	144.085	1.44619	0.417346	3.4652	0.000529828	0.00379614	Up	2.42066
K01766	400.423	1.72011	0.496548	3.46414	0.000531929	0.00380606	Up	2.41952
K01031	83.08	2.89404	0.835933	3.46205	0.000536083	0.00383061	Up	2.41673
K00034	657.089	1.36445	0.394396	3.4596	0.000540986	0.00385525	Up	2.41395
K02771	502.425	1.57531	0.455689	3.45699	0.000546252	0.00387715	Up	2.41149
K07275	138.876	1.51421	0.438128	3.45609	0.000548079	0.00388491	Up	2.41062
K19423	464.837	-1.25056	0.361882	-3.45572	0.000548829	0.00388503	Down	2.41061
K08484	6.82505	-5.9645	1.72964	-3.4484	0.000563925	0.00397597	Down	2.40056
K18297	36.7624	3.20318	0.929266	3.447	0.000566852	0.0039913	Up	2.39889
K02853	285.057	2.21298	0.642961	3.44186	0.000577728	0.00405328	Up	2.39219
K00231	179.716	1.61171	0.468781	3.43809	0.000585835	0.00410317	Up	2.38688
K03557	40.2637	1.91756	0.55794	3.43685	0.000588514	0.00410412	Up	2.38678
K08604	21.3605	-3.20466	0.932226	-3.43764	0.000586807	0.00410412	Down	2.38678
K01587	157.462	1.59031	0.462851	3.4359	0.000590596	0.0041092	Up	2.38624
K01308	570.559	-1.18752	0.346074	-3.43142	0.000600437	0.00416019	Down	2.38089
K18231	71.8468	1.91159	0.557301	3.43008	0.000603401	0.00416567	Up	2.38032
K12661	121.642	1.79621	0.523818	3.42908	0.00060564	0.00417569	Up	2.37927
K07400	170.823	1.55002	0.452382	3.42634	0.000611764	0.00419608	Up	2.37716
K03825	111.222	1.73821	0.507584	3.42449	0.000615962	0.00421398	Up	2.37531
K09895	75.4301	2.55372	0.745691	3.42463	0.000615628	0.00421398	Up	2.37531
K03633	164.806	2.07919	0.607224	3.4241	0.000616842	0.00421456	Up	2.37525
K02782	421.08	1.49499	0.436746	3.42301	0.000619314	0.00422438	Up	2.37424
K19132	17.6748	4.97967	1.45487	3.42277	0.000619874	0.00422438	Up	2.37424
K05372	20.2127	2.09038	0.611449	3.41874	0.000629128	0.00427646	Up	2.36892
K05880	182.423	1.4974	0.438194	3.41721	0.000632654	0.00428943	Up	2.3676
K08161	1156.44	1.07948	0.315893	3.41722	0.000632633	0.00428943	Up	2.3676
K07810	67.2264	2.29012	0.67055	3.41529	0.000637145	0.00429005	Up	2.36754
K08092	407.706	1.19465	0.349668	3.41653	0.000634242	0.00429005	Up	2.36754
K11911	8.22712	3.64789	1.06817	3.41509	0.000637601	0.00429005	Up	2.36754
K00972	931.482	-1.24773	0.36549	-3.41385	0.000640522	0.00429879	Down	2.36665
K08989	56.4647	2.0861	0.611154	3.41338	0.000641634	0.00430081	Up	2.36645
K01497	88.8817	2.07705	0.608903	3.41113	0.000646944	0.00431761	Up	2.36476
K07046	54.5347	1.94521	0.57015	3.41175	0.000645462	0.00431761	Up	2.36476
K17938	160.192	2.36641	0.693685	3.41136	0.000646408	0.00431761	Up	2.36476
K15723	105.742	2.39309	0.701796	3.40995	0.000649745	0.00432782	Up	2.36373
K01227	9705.32	-1.1338	0.332855	-3.40628	0.000658554	0.00437436	Down	2.35909
K03586	61.1396	2.11157	0.619954	3.40601	0.000659206	0.00437436	Up	2.35909
K12218	15.0531	2.88595	0.84729	3.40609	0.000659003	0.00437436	Up	2.35909
K17073	435.826	-1.24163	0.364602	-3.40545	0.000660563	0.00437788	Down	2.35874
K17837	316.019	1.43514	0.421557	3.40437	0.00066317	0.00438967	Up	2.35757
K16291	753.415	1.60754	0.472345	3.40332	0.000665719	0.00439852	Up	2.35669
K07740	91.2826	2.17606	0.639645	3.40199	0.000668983	0.00441163	Up	2.3554
K13069	236.655	2.37313	0.698081	3.3995	0.000675086	0.00444082	Up	2.35254
K18469	23.1934	-5.83407	1.7161	-3.39962	0.000674802	0.00444082	Down	2.35254
K02406	3224.64	-1.02117	0.300493	-3.39833	0.000677998	0.00445446	Down	2.35121
K17247	107.565	2.40046	0.707275	3.39395	0.000688924	0.00451505	Up	2.34534
K07683	12.0025	-2.00145	0.590153	-3.39141	0.00069535	0.00455153	Down	2.34184
K06884	31.8125	2.25236	0.664465	3.38974	0.00069959	0.00457365	Up	2.33974
K01061	215.183	2.20583	0.651009	3.38832	0.000703211	0.00459165	Up	2.33803
K05845	437.792	1.43412	0.423458	3.38669	0.000707424	0.00461348	Up	2.33597
K03392	186.452	1.65551	0.489062	3.38507	0.000711601	0.00461521	Up	2.33581
K09910	89.4608	2.00617	0.592683	3.3849	0.000712042	0.00461521	Up	2.33581
K12581	16.9269	-2.82993	0.835984	-3.38515	0.000711405	0.00461521	Down	2.33581
K18588	72.9366	2.22555	0.657754	3.38356	0.000715516	0.00463207	Up	2.33422
K00329	686.216	-2.02065	0.597449	-3.38213	0.000719255	0.00464938	Down	2.33261
K00135	1055.5	1.34966	0.39926	3.38042	0.000723757	0.00465699	Up	2.33189
K16849	116.185	1.35169	0.400119	3.37821	0.000729582	0.00467698	Up	2.33003
K02681	72.2653	2.26674	0.671236	3.37696	0.000732922	0.00468751	Up	2.32906
K07637	119.775	1.83342	0.543037	3.37623	0.000734872	0.00469433	Up	2.32843
K14956	4.14627	5.41572	1.60523	3.37379	0.000741416	0.00472474	Up	2.32562
K15833	75.1424	2.13085	0.631556	3.37397	0.000740926	0.00472474	Up	2.32562
K00065	146.971	1.65191	0.490031	3.37102	0.000748892	0.00475289	Up	2.32304
K07264	764.93	1.46571	0.434814	3.37089	0.00074925	0.00475289	Up	2.32304
K11898	4.47697	5.06358	1.502	3.37122	0.000748369	0.00475289	Up	2.32304
K15737	184.612	1.94579	0.577299	3.3705	0.000750314	0.00475289	Up	2.32304
K18326	445.029	2.21904	0.658317	3.37078	0.00074956	0.00475289	Up	2.32304
K08305	281.228	1.37805	0.409299	3.36684	0.000760342	0.0047992	Up	2.31883
K15835	125.495	1.95516	0.580978	3.36528	0.000764655	0.00481496	Up	2.31741
K03690	140.829	2.21653	0.658999	3.36347	0.000769679	0.00484085	Up	2.31508
K19133	13.3883	4.92347	1.46475	3.36131	0.00077573	0.00486161	Up	2.31322
K06027	12.5592	-2.4172	0.719687	-3.35868	0.000783164	0.00489662	Down	2.3101
K13727	78.4871	2.83394	0.843861	3.3583	0.000784233	0.00489753	Up	2.31002
K09937	34.0584	2.02341	0.602826	3.35654	0.000789246	0.00491523	Up	2.30846
K03119	173.608	1.71222	0.510367	3.35488	0.000793985	0.00491789	Up	2.30822
K06163	286.415	1.30774	0.389742	3.35539	0.000792523	0.00491789	Up	2.30822
K06384	240.671	-1.35839	0.404814	-3.35559	0.00079197	0.00491789	Down	2.30822
K07279	147.845	2.18367	0.650881	3.35494	0.000793809	0.00491789	Up	2.30822
K09932	45.7423	2.55337	0.761653	3.3524	0.000801134	0.00494817	Up	2.30556
K04753	471.614	1.90946	0.569774	3.35126	0.000804459	0.00495958	Up	2.30455
K17733	467.715	-1.36226	0.406879	-3.34808	0.000813744	0.005011	Down	2.30008
K01849	179.863	1.04449	0.31202	3.34752	0.000815378	0.00501523	Up	2.29971
K09901	44.7579	2.15814	0.644882	3.34657	0.000818183	0.00502666	Up	2.29872
K11941	163.938	2.09336	0.626064	3.34369	0.000826717	0.00506735	Up	2.29522
K00713	410.722	-1.65467	0.49533	-3.34054	0.000836144	0.00511331	Down	2.2913
K19242	432.009	1.54014	0.461479	3.33741	0.000845641	0.00516542	Up	2.28689
K01166	94.1241	1.88055	0.563605	3.33665	0.000847949	0.00517356	Up	2.28621
K13570	3.15525	3.40677	1.02154	3.33492	0.000853243	0.00519988	Up	2.28401
K12213	12.4978	3.1106	0.932855	3.33449	0.000854563	0.00520194	Up	2.28383
K03764	61.3508	2.03011	0.609475	3.33091	0.000865617	0.00526319	Up	2.27875
K09927	207.55	2.10602	0.632387	3.33028	0.000867597	0.00526918	Up	2.27826
K01482	78.7488	-1.66948	0.501766	-3.3272	0.000877239	0.00531557	Down	2.27445
K09912	56.7021	2.17566	0.654252	3.32541	0.000882893	0.00534372	Up	2.27216
K00140	251.759	1.65464	0.498221	3.3211	0.000896635	0.00541453	Up	2.26644
K00870	192.339	-1.92077	0.578572	-3.31984	0.000900692	0.00543284	Down	2.26497
K08168	257.913	1.61417	0.48677	3.31608	0.000912893	0.00548771	Up	2.26061
K00906	206.074	2.10215	0.634203	3.31464	0.000917622	0.00549466	Up	2.26006
K13287	13.8199	4.58465	1.38408	3.3124	0.000924978	0.00552901	Up	2.25735
K00799	1164.61	1.27675	0.385913	3.30838	0.000938357	0.00560267	Up	2.25161
K07190	39.0944	2.6951	0.815198	3.30607	0.000946159	0.00563655	Up	2.24899
K09894	95.9053	2.09374	0.633512	3.30498	0.000949837	0.00565212	Up	2.24779
K01451	231.309	-1.26338	0.382339	-3.30435	0.000951959	0.00565839	Down	2.24731
K01971	2936.33	-1.3364	0.404718	-3.30204	0.000959832	0.00569243	Down	2.2447
K02250	6.53396	-4.86557	1.47478	-3.2992	0.000969624	0.00573299	Down	2.24162
K02507	226.333	1.74703	0.529547	3.29911	0.000969916	0.00573299	Up	2.24162
K14060	162.225	1.57061	0.476	3.29961	0.0009682	0.00573299	Up	2.24162
K01963	284.717	1.43634	0.435634	3.29712	0.000976801	0.00576726	Up	2.23903
K19157	1715.78	-1.1042	0.335012	-3.29599	0.00098074	0.00577765	Down	2.23825
K07286	63.8886	1.96501	0.596548	3.29396	0.000987864	0.00581316	Up	2.23559
K01058	276.985	1.23888	0.376194	3.29319	0.00099059	0.00582273	Up	2.23487
K02298	114.442	1.97269	0.599323	3.29152	0.000996475	0.00585084	Up	2.23278
K11191	34.4699	1.78535	0.542875	3.28869	0.00100654	0.00589689	Up	2.22938
K19267	190.703	1.3606	0.413694	3.2889	0.00100581	0.00589689	Up	2.22938
K08237	78.6515	1.88938	0.574567	3.28835	0.00100778	0.00589764	Up	2.22932
K15034	61.6291	2.05146	0.624328	3.28587	0.00101667	0.00594307	Up	2.22599
K02436	124.111	2.30251	0.701262	3.28338	0.00102571	0.00598662	Up	2.22282
K19505	531.751	1.16164	0.353847	3.28289	0.0010275	0.00598662	Up	2.22282
K05916	295.561	1.26774	0.386466	3.28034	0.00103684	0.00601456	Up	2.2208
K16132	289.361	2.69317	0.822336	3.27502	0.00105655	0.00610764	Up	2.21413
K07235	76.4682	2.01199	0.615016	3.27143	0.00107003	0.00616666	Up	2.20995
K06305	7.44699	-2.1906	0.669806	-3.2705	0.00107358	0.00618036	Down	2.20899
K00875	59.759	2.77782	0.849561	3.26971	0.00107659	0.00619099	Up	2.20824
K12214	8.40838	2.87683	0.880189	3.26842	0.00108149	0.00621241	Up	2.20674
K12137	697.895	1.19828	0.366937	3.26563	0.00109222	0.00626727	Up	2.20292
K05526	186.608	1.69523	0.519246	3.26479	0.00109545	0.00627897	Up	2.20211
K03179	506.823	1.1862	0.363457	3.26366	0.00109983	0.00629729	Up	2.20085
K09904	17.6438	1.92097	0.588689	3.26313	0.0011019	0.00630234	Up	2.2005
K02064	214.523	1.79819	0.551822	3.25863	0.0011195	0.00637552	Up	2.19548
K07664	146.467	2.43447	0.747181	3.25821	0.00112117	0.00637813	Up	2.19531
K10544	380.095	1.6123	0.494931	3.25762	0.0011235	0.00638458	Up	2.19487
K07261	114.565	1.87041	0.574507	3.25568	0.0011312	0.00641458	Up	2.19283
K06211	341.622	1.43625	0.441226	3.25514	0.00113336	0.00641993	Up	2.19247
K02822	1383.66	1.24817	0.383519	3.25453	0.0011358	0.00642006	Up	2.19246
K02624	214.601	1.49033	0.458272	3.25206	0.00114572	0.00646234	Up	2.18961
K12202	24.3273	2.20199	0.677405	3.25062	0.00115152	0.00648816	Up	2.18788
K12145	96.2357	1.98452	0.610742	3.24936	0.00115665	0.00651014	Up	2.18641
K04718	108.407	-4.58802	1.41254	-3.24806	0.00116195	0.00651231	Down	2.18626
K19232	496.524	1.24088	0.382235	3.24639	0.00116881	0.00654383	Up	2.18417
K11179	41.2431	1.52572	0.470092	3.24556	0.00117218	0.0065558	Up	2.18337
K20047	154.744	-3.8913	1.20037	-3.24175	0.00118798	0.00663016	Down	2.17848
K08268	179.401	2.4946	0.770207	3.23888	0.00120002	0.00666969	Up	2.17589
K15659	4.4161	-3.95843	1.22287	-3.23699	0.00120798	0.0067065	Down	2.1735
K13928	95.5345	2.62273	0.811015	3.23389	0.00122117	0.00676559	Up	2.16969
K19420	59.3258	-2.07938	0.643272	-3.23251	0.00122707	0.00677702	Down	2.16896
K06617	41.0091	2.77388	0.858218	3.23214	0.00122868	0.00677885	Up	2.16884
K02460	199.948	1.71013	0.529196	3.23156	0.00123116	0.00678547	Up	2.16842
K03632	344.736	1.53271	0.474902	3.22743	0.00124907	0.00686278	Up	2.1635
K09823	116.321	2.23833	0.694385	3.22347	0.00126648	0.00693686	Up	2.15884
K05521	914.588	1.14801	0.356215	3.2228	0.00126943	0.00694582	Up	2.15828
K16301	157.041	1.88976	0.587407	3.21713	0.00129481	0.00706282	Up	2.15102
K13281	28.2235	-1.89606	0.589421	-3.21682	0.0012962	0.00706318	Down	2.151
K13143	6.02333	-6.43302	2.00171	-3.21376	0.00131011	0.00712431	Down	2.14726
K01194	812.398	1.43146	0.44602	3.20941	0.00133009	0.00721076	Up	2.14202
K05798	273.714	2.09825	0.654172	3.20749	0.00133897	0.00724409	Up	2.14002
K02686	79.8001	1.40894	0.439327	3.20703	0.00134111	0.00724827	Up	2.13977
K05811	40.4372	2.39969	0.748766	3.20485	0.00135131	0.00727659	Up	2.13807
K05815	220.862	1.31592	0.410587	3.20497	0.00135076	0.00727659	Up	2.13807
K08196	568.031	1.61049	0.502431	3.20539	0.00134879	0.00727659	Up	2.13807
K06968	164.801	1.55947	0.487303	3.2002	0.00137333	0.00736237	Up	2.13298
K01920	124.506	2.15853	0.674667	3.19941	0.0013771	0.00737516	Up	2.13223
K06948	844.137	-1.72614	0.539812	-3.19768	0.0013854	0.00741208	Down	2.13006
K07054	195.403	1.42291	0.445354	3.19502	0.00139821	0.00746557	Up	2.12694
K09791	47.9311	1.4712	0.46046	3.19506	0.00139804	0.00746557	Up	2.12694
K09920	83.1483	2.23271	0.699397	3.19234	0.00141126	0.00751254	Up	2.12421
K11021	57.5034	2.54637	0.797636	3.1924	0.00141097	0.00751254	Up	2.12421
K10017	126.663	2.26561	0.710051	3.19076	0.00141897	0.00753844	Up	2.12272
K04064	46.1497	2.29639	0.719965	3.18958	0.00142478	0.00756175	Up	2.12138
K03468	365.855	1.96032	0.614733	3.18889	0.00142818	0.00757222	Up	2.12078
K09802	68.3885	1.36729	0.428945	3.18756	0.00143477	0.00759199	Up	2.11964
K13818	106.006	2.47798	0.777339	3.18778	0.00143371	0.00759199	Up	2.11964
K13932	94.6659	2.51164	0.788369	3.18587	0.00144318	0.00762049	Up	2.11802
K08321	395.305	1.13115	0.355179	3.18474	0.00144882	0.00763503	Up	2.11719
K03919	106.74	2.2537	0.707856	3.18384	0.00145334	0.00764445	Up	2.11665
K05817	104.362	-1.28134	0.402493	-3.18352	0.00145497	0.00764542	Down	2.1166
K07274	254.175	1.49066	0.468548	3.18145	0.00146538	0.0076925	Up	2.11393
K07280	32.3205	2.47989	0.77958	3.18106	0.00146739	0.00769547	Up	2.11376
K04032	178.625	1.12248	0.353008	3.17976	0.00147396	0.00772228	Up	2.11225
K06609	564.995	1.92742	0.606665	3.17708	0.00148768	0.00777877	Up	2.10909
K12228	9.61419	3.74022	1.17743	3.17659	0.00149016	0.00778405	Up	2.10879
K06348	143.801	-1.71992	0.541542	-3.17597	0.00149335	0.00778923	Down	2.10851
K19778	77.575	2.31256	0.728204	3.17571	0.0014947	0.00778923	Up	2.10851
K11312	119.891	-2.43587	0.767468	-3.1739	0.00150406	0.00780399	Down	2.10768
K12266	304.275	2.57102	0.810062	3.17386	0.00150428	0.00780399	Up	2.10768
K09918	40.8948	2.45851	0.774817	3.17302	0.00150861	0.00781882	Up	2.10686
K04091	187.335	2.15266	0.678509	3.17264	0.0015106	0.00782035	Up	2.10677
K02666	33.8521	-2.00663	0.633206	-3.169	0.00152963	0.00788919	Down	2.10297
K03243	6.3415	-5.07414	1.60425	-3.16295	0.00156182	0.00802599	Down	2.0955
K09954	35.7804	2.14922	0.679516	3.16287	0.00156221	0.00802599	Up	2.0955
K02317	128.096	1.96485	0.621797	3.15996	0.0015779	0.00809879	Up	2.09158
K00832	398.116	1.00886	0.319386	3.15875	0.00158448	0.00812468	Up	2.09019
K00524	22.7304	-2.76865	0.877009	-3.15692	0.00159443	0.00816245	Down	2.08818
K08315	92.3969	1.81176	0.574073	3.15598	0.00159958	0.00817546	Up	2.08749
K04065	118.062	2.04168	0.647153	3.15486	0.00160576	0.00818627	Up	2.08691
K06078	26.4053	2.27912	0.723223	3.15133	0.00162526	0.00827776	Up	2.08209
K03012	8.59587	-1.64218	0.521369	-3.14975	0.00163408	0.00831466	Down	2.08016
K00448	32.9822	3.43165	1.09108	3.14519	0.00165977	0.00842	Up	2.07469
K09914	86.3322	2.25582	0.717282	3.14495	0.00166113	0.00842	Up	2.07469
K02679	64.7149	2.52731	0.803804	3.14418	0.00166553	0.00843423	Up	2.07395
K00523	353.552	1.41502	0.450199	3.14309	0.00167173	0.00845754	Up	2.07276
K01525	292.318	1.22532	0.389898	3.14266	0.00167418	0.00846185	Up	2.07253
K01771	1840.82	-1.35865	0.432521	-3.14124	0.00168232	0.00849492	Down	2.07084
K00098	165.466	1.84864	0.588784	3.13976	0.00169088	0.00853002	Up	2.06905
K05812	80.7351	2.23785	0.712953	3.13884	0.00169616	0.00854851	Up	2.06811
K12151	31.1571	2.18861	0.697383	3.13831	0.00169923	0.00855584	Up	2.06774
K07140	193.596	2.18314	0.695796	3.13762	0.00170328	0.00856	Up	2.06753
K08794	11.1989	-2.88056	0.918022	-3.13779	0.00170229	0.00856	Down	2.06753
K09917	15.2905	2.13447	0.680531	3.13648	0.00170988	0.00857689	Up	2.06667
K05779	112.161	1.91493	0.610646	3.13591	0.0017132	0.00858545	Up	2.06624
K02440	1135	1.06186	0.338672	3.13537	0.0017164	0.00859335	Up	2.06584
K14762	59.9223	2.24459	0.716157	3.13422	0.00172312	0.00860264	Up	2.06537
K19158	6935.24	-1.51044	0.481908	-3.1343	0.00172265	0.00860264	Down	2.06537
K03599	98.5585	2.05113	0.654676	3.13304	0.00173005	0.00862428	Up	2.06428
K00801	21.3092	3.65015	1.1663	3.12968	0.00174997	0.00868791	Up	2.06108
K07662	128.277	2.09974	0.670914	3.12967	0.00175004	0.00868791	Up	2.06108
K03774	66.7745	2.08833	0.667469	3.12873	0.00175563	0.00869515	Up	2.06072
K02625	171.4	2.08055	0.66521	3.12767	0.00176199	0.00869673	Up	2.06064
K07234	14.121	2.1985	0.704475	3.12076	0.00180385	0.00885559	Up	2.05278
K12993	16.3828	-3.84379	1.23188	-3.12025	0.00180697	0.00886266	Down	2.05244
K07781	106.306	2.30637	0.739317	3.1196	0.00181099	0.0088742	Up	2.05187
K06149	218.966	1.13804	0.36493	3.11852	0.00181759	0.00889829	Up	2.05069
K02297	176.927	2.0986	0.673134	3.11766	0.00182294	0.00890804	Up	2.05022
K13611	24.6542	1.8292	0.586887	3.11678	0.00182835	0.00892625	Up	2.04933
K15015	12.3571	-2.91735	0.936921	-3.11376	0.0018472	0.00900172	Down	2.04567
K14832	10.4385	2.49525	0.802316	3.11006	0.00187052	0.00909027	Up	2.04142
K03207	32.1037	2.32543	0.74842	3.10711	0.00188925	0.00917288	Up	2.03749
K02009	96.7576	1.12139	0.36119	3.1047	0.00190471	0.00923951	Up	2.03435
K01823	338.631	1.1087	0.3572	3.10386	0.00191016	0.00925746	Up	2.03351
K02280	603.104	1.3139	0.423467	3.10272	0.00191752	0.00927616	Up	2.03263
K09880	79.6983	2.45634	0.791924	3.10173	0.00192392	0.00929864	Up	2.03158
K07589	54.5831	2.23244	0.719862	3.10121	0.0019273	0.00930653	Up	2.03121
K03214	101.069	1.82989	0.590283	3.10002	0.00193507	0.00933146	Up	2.03005
K06726	223.119	1.01747	0.32823	3.09988	0.00193599	0.00933146	Up	2.03005
K18657	87.9996	2.28599	0.738005	3.09753	0.0019514	0.00938868	Up	2.0274
K18093	204.133	1.95282	0.630719	3.09619	0.00196028	0.00942283	Up	2.02582
K03181	110.821	2.21648	0.716092	3.09525	0.00196647	0.00942695	Up	2.02563
K17218	70.2135	1.60094	0.517907	3.09117	0.00199371	0.00954034	Up	2.02044
K01577	188.873	1.68962	0.5473	3.0872	0.00202051	0.00965111	Up	2.01542
K12289	97.215	2.26065	0.732363	3.08679	0.00202332	0.00965583	Up	2.01521
K10240	8.60543	2.28147	0.739828	3.08378	0.00204389	0.0097365	Up	2.0116
K08308	16.3616	3.20117	1.03872	3.08184	0.00205724	0.00979127	Up	2.00916
K09907	61.3937	1.94694	0.63206	3.0803	0.00206791	0.00983323	Up	2.0073
K18721	14.2124	-3.57856	1.16198	-3.07971	0.00207204	0.00984405	Down	2.00683
K00360	34.2718	2.17094	0.705197	3.07849	0.00208055	0.00987561	Up	2.00544
K11935	457.073	1.45896	0.474119	3.0772	0.00208955	0.00990063	Up	2.00434
K12604	5.3979	-3.0145	0.980372	-3.07486	0.00210603	0.00995705	Down	2.00187
K18765	511.411	1.47343	0.479336	3.07389	0.00211285	0.00997536	Up	2.00107
K14064	42.9375	2.35706	0.767265	3.07203	0.0021261	0.0100201	Up	1.99913
K06165	160.948	1.21572	0.396273	3.06788	0.00215581	0.0100893	Up	1.99614
K07245	141.156	2.46073	0.802076	3.06795	0.00215529	0.0100893	Up	1.99614
K09161	92.5142	1.87025	0.609491	3.06854	0.0021511	0.0100893	Up	1.99614
K09968	422.174	-1.95136	0.636204	-3.06718	0.00216087	0.0101031	Down	1.99555
K03807	147.654	2.19547	0.717134	3.06145	0.00220271	0.010268	Up	1.98851
K13938	103.551	2.29783	0.750773	3.06061	0.00220886	0.0102822	Up	1.98792
K11530	46.1246	1.56471	0.511344	3.06	0.00221337	0.0102851	Up	1.98779
K05966	260.854	1.6821	0.550482	3.05569	0.00224543	0.0104158	Up	1.98231
K00368	16.7794	2.16993	0.710198	3.05539	0.00224765	0.010417	Up	1.98226
K09786	186.496	1.86337	0.610008	3.05467	0.0022531	0.0104331	Up	1.98159
K03804	106.726	1.96776	0.644499	3.05316	0.00226446	0.0104675	Up	1.98016
K13075	100.035	1.38192	0.452584	3.0534	0.00226263	0.0104675	Up	1.98016
K14414	132.503	1.5353	0.503248	3.05078	0.0022825	0.0105233	Up	1.97785
K02170	193.797	1.54473	0.506884	3.0475	0.00230754	0.0106111	Up	1.97424
K11107	23.8788	1.86133	0.61117	3.04551	0.00232284	0.0106722	Up	1.97175
K12204	11.2272	2.53415	0.833334	3.04098	0.00235809	0.0108154	Up	1.96596
K19134	172.753	-1.63915	0.53907	-3.0407	0.00236026	0.010816	Down	1.96593
K01049	40.8379	-2.54019	0.835652	-3.03977	0.00236761	0.0108403	Down	1.96496
K18214	616.871	-1.16159	0.382277	-3.03861	0.00237675	0.0108596	Down	1.96419
K01107	3.05797	2.50262	0.823859	3.03768	0.00238407	0.0108687	Up	1.96382
K10040	22.1433	1.76366	0.580683	3.03722	0.00238768	0.0108758	Up	1.96354
K07796	667.567	1.4196	0.467743	3.03499	0.00240544	0.0109474	Up	1.96069
K03184	300.194	1.77112	0.584098	3.03223	0.00242752	0.0110289	Up	1.95747
K02168	934.593	1.47603	0.487098	3.03026	0.00244345	0.0110917	Up	1.955
K05522	143.982	2.00023	0.660173	3.02986	0.00244669	0.011097	Up	1.9548
K03712	59.9638	2.14197	0.707193	3.02884	0.00245498	0.011125	Up	1.9537
K06193	92.5102	1.51585	0.500601	3.02806	0.0024613	0.0111442	Up	1.95295
K03749	120.089	2.06923	0.683743	3.02633	0.00247546	0.0111686	Up	1.952
K05847	558.383	1.01523	0.335436	3.0266	0.0024732	0.0111686	Up	1.952
K07262	2.31152	4.50482	1.48858	3.02625	0.00247608	0.0111686	Up	1.952
K07340	97.0386	1.48445	0.490549	3.02611	0.00247723	0.0111686	Up	1.952
K13014	258.666	1.81949	0.601106	3.02691	0.00247066	0.0111686	Up	1.952
K03651	155.739	1.8255	0.603447	3.02511	0.0024854	0.0111769	Up	1.95168
K07288	74.3523	-1.75294	0.579432	-3.02527	0.00248414	0.0111769	Down	1.95168
K18325	28.8614	2.6451	0.87436	3.02518	0.00248485	0.0111769	Up	1.95168
K07675	238.184	1.4121	0.466894	3.02445	0.00249082	0.0111823	Up	1.95147
K11746	137.676	1.24841	0.412745	3.02466	0.00248909	0.0111823	Up	1.95147
K07113	90.753	2.18033	0.721079	3.0237	0.00249703	0.0111983	Up	1.95085
K08310	74.5634	1.39851	0.462936	3.02096	0.00251971	0.0112359	Up	1.94939
K08344	4.74835	5.67641	1.87879	3.02131	0.0025168	0.0112359	Up	1.94939
K07470	55.1424	1.93495	0.640881	3.0192	0.00253443	0.011292	Up	1.94723
K02781	142.345	1.41059	0.467594	3.0167	0.0025554	0.0113568	Up	1.94474
K09019	84.0271	2.21386	0.733784	3.01705	0.00255251	0.0113568	Up	1.94474
K02774	156.965	1.38949	0.460725	3.01587	0.00256245	0.0113691	Up	1.94427
K01596	310.276	-1.29256	0.42911	-3.01219	0.00259367	0.0114782	Down	1.94012
K03603	122.062	1.33638	0.44373	3.0117	0.00259787	0.0114782	Up	1.94012
K03840	105.528	1.81507	0.602801	3.01106	0.00260339	0.0114835	Up	1.93993
K06560	14.9536	-2.55292	0.84779	-3.01126	0.00260166	0.0114835	Down	1.93993
K12142	509.101	1.11616	0.370846	3.00978	0.00261441	0.0115225	Up	1.93845
K00477	31.0669	3.65324	1.21393	3.00943	0.00261735	0.0115259	Up	1.93833
K05365	398.003	1.6188	0.538259	3.00747	0.00263433	0.0115539	Up	1.93727
K12112	73.0012	2.07656	0.690533	3.00719	0.00263678	0.0115539	Up	1.93727
K03765	207.212	2.10298	0.699411	3.0068	0.00264018	0.0115592	Up	1.93707
K11258	40.0684	2.08336	0.693161	3.00559	0.00265068	0.0115766	Up	1.93642
K00701	827.51	-1.76983	0.589304	-3.00326	0.00267108	0.0116273	Down	1.93452
K07147	189.887	1.93752	0.645046	3.0037	0.00266719	0.0116273	Up	1.93452
K07357	152.85	2.21886	0.738783	3.0034	0.00266978	0.0116273	Up	1.93452
K13280	590.208	-1.01817	0.339541	-2.99867	0.00271165	0.0117653	Down	1.9294
K00573	117.797	1.57098	0.523944	2.99837	0.00271425	0.0117669	Up	1.92934
K00957	598.755	-1.81578	0.605732	-2.99767	0.00272054	0.0117749	Down	1.92904
K06895	537.753	1.09434	0.365102	2.99735	0.0027234	0.0117777	Up	1.92894
K00532	91.186	-1.45991	0.487314	-2.99583	0.002737	0.0118071	Down	1.92786
K14347	155.751	1.79969	0.60078	2.99559	0.0027391	0.0118071	Up	1.92786
K01141	266.992	1.13495	0.379098	2.99383	0.002755	0.0118467	Up	1.9264
K10748	124.643	2.25886	0.754499	2.99385	0.00275477	0.0118467	Up	1.9264
K14796	2.91904	2.96692	0.991291	2.99299	0.00276259	0.0118697	Up	1.92556
K13849	5.91045	5.20817	1.74042	2.99248	0.00276725	0.0118801	Up	1.92518
K18579	232.069	1.32104	0.441936	2.9892	0.00279711	0.0119792	Up	1.92157
K04691	297.762	1.31878	0.441541	2.98677	0.00281939	0.0120357	Up	1.91953
K05523	26.2948	2.46539	0.825256	2.98742	0.00281338	0.0120357	Up	1.91953
K01521	138.229	2.03689	0.682184	2.98584	0.00282804	0.012063	Up	1.91855
K03567	148.32	1.27101	0.425783	2.9851	0.00283484	0.0120768	Up	1.91805
K07471	4.9279	2.88645	0.966987	2.98499	0.00283585	0.0120768	Up	1.91805
K09158	61.2342	1.19637	0.40086	2.9845	0.00284043	0.0120845	Up	1.91777
K13771	123.107	1.45749	0.488384	2.98431	0.00284221	0.0120845	Up	1.91777
K00163	369.668	1.41535	0.474386	2.98353	0.00284943	0.0120882	Up	1.91764
K02451	67.8919	2.44113	0.818203	2.98353	0.00284948	0.0120882	Up	1.91764
K05962	250.304	1.70673	0.572062	2.98348	0.00284993	0.0120882	Up	1.91764
K04775	124.202	2.19132	0.735209	2.98053	0.00287746	0.0121712	Up	1.91467
K07490	34.1259	2.17075	0.72834	2.98041	0.00287866	0.0121712	Up	1.91467
K06137	61.5212	3.02654	1.01637	2.97778	0.00290341	0.0122465	Up	1.91199
K16044	377.569	1.19919	0.403572	2.97145	0.002964	0.0124329	Up	1.90543
K13018	304.692	-1.38833	0.467369	-2.97052	0.00297298	0.012441	Down	1.90514
K19688	59.2677	2.32571	0.782881	2.97071	0.00297115	0.012441	Up	1.90514
K02221	199.988	1.02111	0.344163	2.96694	0.00300775	0.0125766	Up	1.90044
K09973	1621.18	-1.1853	0.399682	-2.96561	0.0030208	0.0126212	Down	1.8989
K08276	71.0646	2.18458	0.737123	2.96366	0.00304008	0.0126722	Up	1.89715
K07241	132.913	2.68279	0.905544	2.96262	0.00305029	0.0126844	Up	1.89673
K13631	58.9172	1.9734	0.666431	2.96114	0.00306499	0.0127356	Up	1.89498
K10212	77.2056	-1.77527	0.600145	-2.95807	0.00309567	0.0128302	Down	1.89177
K11940	37.1435	2.04324	0.690669	2.95834	0.00309297	0.0128302	Up	1.89177
K14189	8.94598	-2.65004	0.896145	-2.95716	0.00310492	0.0128511	Down	1.89106
K00998	119.11	1.47681	0.499474	2.95672	0.00310929	0.0128586	Up	1.8908
K02655	6.87057	-2.7263	0.92311	-2.95338	0.00314314	0.0129592	Down	1.88742
K19337	672.034	1.21444	0.411239	2.95313	0.00314569	0.0129592	Up	1.88742
K12136	137.541	1.68478	0.571146	2.94982	0.00317959	0.0130381	Up	1.88479
K01032	97.7351	2.49568	0.846469	2.94834	0.00319491	0.0130907	Up	1.88304
K11904	1395.43	1.12257	0.380903	2.94713	0.00320737	0.0131114	Up	1.88235
K05780	187.543	1.26895	0.430881	2.94501	0.00322947	0.0131568	Up	1.88085
K02291	30.6251	2.17949	0.740928	2.94157	0.00326556	0.0132675	Up	1.87721
K12582	255.25	1.73593	0.590944	2.93755	0.00330815	0.0134199	Up	1.87225
K01669	203.006	1.93247	0.658311	2.93549	0.0033302	0.0134887	Up	1.87003
K02533	363.188	1.22887	0.418945	2.93326	0.00335424	0.0135585	Up	1.86779
K03971	20.8177	2.30205	0.784832	2.93318	0.0033551	0.0135585	Up	1.86779
K05712	305.801	1.43616	0.4901	2.93035	0.00338582	0.0136618	Up	1.86449
K04785	101.834	1.91855	0.655218	2.92811	0.00341029	0.0137188	Up	1.86268
K05550	20.3466	3.17687	1.08574	2.92598	0.00343373	0.0137922	Up	1.86037
K00230	200.304	1.01461	0.346846	2.92524	0.00344188	0.0138144	Up	1.85967
K01575	110.39	1.60259	0.548048	2.92417	0.00345372	0.013841	Up	1.85883
K12267	112.308	1.63148	0.557899	2.92433	0.00345203	0.013841	Up	1.85883
K06197	26.618	2.26346	0.774286	2.92328	0.00346361	0.0138702	Up	1.85792
K09139	5.09966	-5.82592	1.99331	-2.92274	0.00346966	0.0138839	Down	1.85749
K03187	128.945	1.14766	0.392936	2.92073	0.0034921	0.0139421	Up	1.85567
K02193	157.519	1.22095	0.418552	2.91708	0.00353322	0.0140745	Up	1.85157
K13633	229.527	2.00089	0.686016	2.91668	0.00353774	0.0140782	Up	1.85145
K09457	4.36433	-4.52065	1.55049	-2.91562	0.00354986	0.014109	Down	1.85051
K05927	593.594	1.37576	0.471996	2.91477	0.0035595	0.0141218	Up	1.85011
K07225	126.614	2.26614	0.77781	2.9135	0.00357407	0.0141522	Up	1.84918
K02301	118.864	1.86804	0.641386	2.91251	0.00358541	0.0141759	Up	1.84845
K08997	143.115	2.03622	0.699799	2.90972	0.00361755	0.0142816	Up	1.84522
K07318	406.389	-1.83659	0.631423	-2.90865	0.00362991	0.0143091	Down	1.84439
K01728	3956.2	-1.43342	0.493004	-2.90753	0.00364298	0.0143287	Down	1.84379
K02392	147.664	1.27663	0.43935	2.90572	0.00366404	0.0144008	Up	1.84161
K15836	19.4979	2.55205	0.878705	2.90433	0.00368041	0.0144438	Up	1.84032
K16087	406.417	1.47547	0.508175	2.90347	0.00369048	0.0144619	Up	1.83978
K18476	141.11	2.1892	0.753951	2.90364	0.0036885	0.0144619	Up	1.83978
K15549	164.02	1.97743	0.681314	2.90238	0.00370336	0.0145016	Up	1.83858
K00903	43.8832	-1.76933	0.609722	-2.90186	0.0037096	0.0145046	Down	1.83849
K07645	259.616	1.43391	0.494128	2.90189	0.00370914	0.0145046	Up	1.83849
K12453	360.266	-1.77328	0.611427	-2.90023	0.00372886	0.0145692	Down	1.83656
K09916	29.1659	2.21678	0.765039	2.8976	0.0037603	0.0146489	Up	1.8342
K08070	15.4977	3.22798	1.11419	2.89715	0.00376565	0.0146589	Up	1.8339
K06402	144	-1.34411	0.464217	-2.89544	0.00378623	0.0147067	Down	1.83249
K11071	275.337	1.07464	0.371221	2.89488	0.00379299	0.0147221	Up	1.83203
K19419	3805.63	-1.22625	0.423726	-2.89396	0.00380416	0.0147547	Down	1.83107
K08311	128.728	1.43418	0.495739	2.89301	0.00381574	0.014778	Up	1.83038
K05594	79.5254	1.74183	0.602483	2.89109	0.00383909	0.0148575	Up	1.82805
K12147	32.8447	2.20379	0.762467	2.89034	0.00384826	0.0148822	Up	1.82733
K03185	157.848	2.06722	0.715455	2.88938	0.00386006	0.0149169	Up	1.82632
K03304	178.694	1.59688	0.552892	2.88823	0.00387422	0.0149608	Up	1.82505
K13177	23.4153	-4.97291	1.72287	-2.8864	0.00389676	0.0150201	Down	1.82333
K00455	136.102	1.57917	0.547723	2.88315	0.00393719	0.0151158	Up	1.82057
K00366	1293.7	1.21657	0.422083	2.8823	0.00394777	0.0151236	Up	1.82034
K03970	28.0297	2.10346	0.730243	2.88049	0.00397056	0.0151999	Up	1.81816
K06048	211.294	1.7356	0.602657	2.87992	0.00397776	0.0152165	Up	1.81769
K13301	99.4746	2.08144	0.723313	2.87764	0.0040066	0.0153048	Up	1.81517
K08970	262.094	1.87827	0.652792	2.87728	0.0040112	0.0153113	Up	1.81499
K02584	200.924	1.28135	0.445591	2.87561	0.00403253	0.0153595	Up	1.81362
K16137	393.031	1.19753	0.416605	2.87451	0.00404658	0.015402	Up	1.81242
K04781	43.3511	2.61525	0.910371	2.87273	0.00406944	0.0154668	Up	1.8106
K00450	28.5166	1.70452	0.593692	2.87104	0.0040912	0.0155272	Up	1.80891
K02552	14.1318	4.6485	1.61897	2.87127	0.00408832	0.0155272	Up	1.80891
K06337	2.63793	-3.40121	1.18501	-2.87018	0.00410238	0.0155585	Down	1.80803
K03863	208.687	1.7183	0.59917	2.8678	0.00413334	0.0156424	Up	1.8057
K02430	103.757	1.74207	0.607748	2.86643	0.00415134	0.0156769	Up	1.80474
K07186	70.5364	1.81425	0.632849	2.86679	0.00414655	0.0156769	Up	1.80474
K01760	15.0751	1.91715	0.668988	2.86574	0.0041603	0.0156821	Up	1.80459
K14057	346.993	1.14673	0.400131	2.86588	0.00415851	0.0156821	Up	1.80459
K19429	389.229	1.72858	0.603348	2.86498	0.00417031	0.0157038	Up	1.804
K18778	183.672	1.29805	0.453239	2.86396	0.00418387	0.0157437	Up	1.80289
K04030	81.2498	1.11318	0.388788	2.8632	0.00419381	0.0157699	Up	1.80217
K09607	8976.59	-1.77734	0.62109	-2.86165	0.00421438	0.015836	Down	1.80035
K11743	88.3103	1.31203	0.458578	2.86108	0.00422199	0.0158534	Up	1.79988
K02300	58.8217	1.85392	0.648517	2.8587	0.0042538	0.0159615	Up	1.79693
K05517	145.816	1.56859	0.548913	2.85764	0.00426809	0.0159925	Up	1.79608
K00484	149.955	1.85641	0.650177	2.85523	0.00430053	0.0160744	Up	1.79386
K07317	2206.98	-1.04783	0.367318	-2.85265	0.00433558	0.0161768	Down	1.79111
K09162	49.7207	2.33069	0.816979	2.85281	0.0043334	0.0161768	Up	1.79111
K01781	27.4285	1.66337	0.583607	2.85015	0.00436987	0.016259	Up	1.78891
K07690	76.9745	1.92173	0.67438	2.84963	0.00437699	0.0162741	Up	1.7885
K16697	274.86	-1.41467	0.496592	-2.84875	0.00438911	0.0163022	Down	1.78776
K18299	286.222	1.45878	0.512099	2.84864	0.0043907	0.0163022	Up	1.78776
K00884	3.52807	-2.10056	0.737932	-2.84655	0.00441959	0.0163979	Down	1.78521
K03656	563.582	1.23817	0.435451	2.84343	0.00446315	0.0165457	Up	1.78131
K07222	136.191	2.75769	0.970266	2.8422	0.00448031	0.0165884	Up	1.7802
K02363	362.67	1.39857	0.492206	2.84143	0.0044912	0.0165957	Up	1.78
K07283	104.224	1.82494	0.642284	2.84133	0.00449263	0.0165957	Up	1.78
K08087	17.2129	4.23104	1.48926	2.84103	0.00449677	0.0165957	Up	1.78
K09729	164.018	1.08633	0.382306	2.84153	0.0044897	0.0165957	Up	1.78
K19338	113.711	1.36785	0.481891	2.83851	0.0045324	0.0166996	Up	1.77729
K08306	192.031	1.2489	0.440034	2.83819	0.00453697	0.0167049	Up	1.77716
K18918	52.137	1.26369	0.44535	2.83751	0.00454665	0.0167289	Up	1.77653
K05346	334.172	1.25995	0.444131	2.83689	0.00455553	0.0167412	Up	1.77621
K09766	512.392	-1.09654	0.386538	-2.83683	0.00455632	0.0167412	Down	1.77621
K07481	33959.9	-1.05994	0.373763	-2.83587	0.00457008	0.0167685	Down	1.7755
K12944	66.1188	2.04387	0.721344	2.83343	0.00460519	0.016871	Up	1.77286
K09018	270.883	1.87204	0.661103	2.83169	0.00463031	0.0169426	Up	1.77102
K00364	183.998	1.16795	0.412816	2.82923	0.00466606	0.0170275	Up	1.76885
K06145	455.628	1.48225	0.52395	2.82899	0.00466955	0.0170275	Up	1.76885
K16074	133.695	1.4186	0.501802	2.82701	0.00469849	0.0171212	Up	1.76647
K11130	6.37289	-4.57897	1.61996	-2.82659	0.00470462	0.0171318	Down	1.7662
K03670	472.019	1.67916	0.594617	2.82393	0.00474383	0.0172463	Up	1.76331
K04770	381.949	1.20172	0.425568	2.8238	0.00474581	0.0172463	Up	1.76331
K00819	399.694	1.3636	0.483065	2.8228	0.00476062	0.0172882	Up	1.76225
K17717	53.0667	2.12239	0.75224	2.82143	0.00478108	0.0173506	Up	1.76068
K06202	75.0204	1.19837	0.424952	2.82001	0.00480219	0.0174034	Up	1.75937
K09137	51.7538	2.01064	0.712971	2.82009	0.00480102	0.0174034	Up	1.75937
K07459	4781.17	-1.00847	0.358139	-2.81585	0.00486478	0.0176113	Down	1.75421
K00673	292.383	1.473	0.523444	2.81406	0.00489201	0.0176694	Up	1.75278
K07337	99.2968	1.49481	0.531946	2.81009	0.00495281	0.0178517	Up	1.74832
K06866	52.4637	1.80141	0.641184	2.80951	0.00496162	0.0178713	Up	1.74784
K02404	635.481	-1.15113	0.41035	-2.80524	0.0050279	0.018074	Down	1.74295
K19049	3026.7	-1.21749	0.434009	-2.80523	0.00502812	0.018074	Down	1.74295
K11925	263.347	1.5178	0.542206	2.79932	0.00512111	0.0183584	Up	1.73616
K14168	13.0989	-3.05699	1.09216	-2.79903	0.00512557	0.018362	Down	1.73608
K19169	149.382	-1.6294	0.582606	-2.79675	0.00516198	0.018455	Down	1.73389
K13655	12.0659	2.36317	0.845443	2.79519	0.00518699	0.018507	Up	1.73266
K15545	144.51	1.85476	0.663697	2.79459	0.0051966	0.0185179	Up	1.73241
K04755	76.9019	1.1628	0.416198	2.79387	0.00520815	0.0185386	Up	1.73192
K07237	37.6583	1.89036	0.677723	2.78929	0.00528238	0.0187203	Up	1.72769
K13953	205.567	1.52164	0.545635	2.78874	0.00529128	0.0187203	Up	1.72769
K04333	120.539	1.70133	0.61159	2.78182	0.00540551	0.0190615	Up	1.71984
K07494	1255.08	-1.13483	0.407958	-2.78172	0.00540712	0.0190615	Down	1.71984
K05846	278.124	1.57906	0.568008	2.78	0.00543585	0.0191247	Up	1.71841
K07121	583.846	1.09427	0.393596	2.78019	0.00543264	0.0191247	Up	1.71841
K00879	20.5791	4.62648	1.66529	2.77818	0.00546645	0.0191941	Up	1.71683
K03809	97.9563	1.38432	0.498734	2.77567	0.0055088	0.0193045	Up	1.71434
K03636	46.0878	1.21914	0.439354	2.77485	0.00552278	0.0193183	Up	1.71403
K09788	361.947	1.13164	0.40783	2.77479	0.00552369	0.0193183	Up	1.71403
K15736	134.228	-1.29313	0.466127	-2.77419	0.00553394	0.0193414	Down	1.71351
K08167	227.72	1.36353	0.491837	2.77232	0.00556576	0.0194166	Up	1.71183
K15984	264.969	1.06459	0.384012	2.77229	0.00556643	0.0194166	Up	1.71183
K15973	234.127	1.1092	0.400305	2.77088	0.00559055	0.0194809	Up	1.71039
K07008	140.327	1.52005	0.549647	2.7655	0.00568351	0.0197729	Up	1.70393
K02461	255.36	1.39328	0.504722	2.76049	0.00577148	0.0200002	Up	1.69896
K15536	69.8975	1.9914	0.721483	2.76016	0.00577738	0.0200076	Up	1.6988
K09902	26.5325	1.845	0.669257	2.75679	0.00583713	0.0201619	Up	1.69547
K13060	2.09068	4.71683	1.7124	2.75452	0.00587781	0.0202759	Up	1.69302
K16845	90.1753	1.97623	0.717967	2.75254	0.00591349	0.0203593	Up	1.69124
K15067	24.1374	2.88009	1.04726	2.75011	0.00595753	0.0204843	Up	1.68858
K00363	44.3808	1.89078	0.688328	2.74691	0.00601594	0.0206694	Up	1.68467
K18920	24.1419	1.6897	0.615397	2.7457	0.00603811	0.0207211	Up	1.68359
K19846	32.521	-2.67551	0.974686	-2.745	0.00605105	0.0207386	Down	1.68322
K16435	767.679	-2.79838	1.02064	-2.7418	0.00611038	0.0209284	Down	1.67926
K15547	289.921	1.71094	0.624138	2.74129	0.00611989	0.0209475	Up	1.67887
K00631	317.172	1.28985	0.47063	2.74069	0.00613102	0.0209585	Up	1.67864
K03228	33.7868	1.43258	0.522903	2.73967	0.0061501	0.0210102	Up	1.67757
K00313	368.201	1.38656	0.506862	2.73558	0.00622699	0.0212352	Up	1.67294
K02393	49.2407	2.10938	0.771141	2.7354	0.00623042	0.0212352	Up	1.67294
K03112	302.172	1.80341	0.659294	2.73536	0.00623121	0.0212352	Up	1.67294
K07347	3635.23	1.2503	0.457745	2.73142	0.00630611	0.0214465	Up	1.66864
K10143	7.06182	-5.92862	2.17215	-2.72938	0.00634536	0.0215385	Down	1.66679
K08993	43.2069	1.90097	0.696829	2.72802	0.00637154	0.0215774	Up	1.666
K19624	156.766	1.64014	0.60115	2.72834	0.00636547	0.0215774	Up	1.666
K01922	9.39489	2.96521	1.08744	2.72677	0.00639578	0.0216403	Up	1.66474
K08351	135.781	1.91538	0.702847	2.72517	0.00642679	0.0217272	Up	1.663
K03669	282.65	1.65693	0.608198	2.72433	0.00644314	0.021759	Up	1.66236
K00015	515.808	1.00681	0.369683	2.72343	0.00646079	0.0218046	Up	1.66145
K03626	64.7012	-1.74679	0.641731	-2.72199	0.00648897	0.0218858	Down	1.65984
K00960	16.4737	-2.62232	0.963581	-2.72144	0.00649991	0.0219088	Down	1.65938
K13650	38.6061	2.04802	0.752771	2.72064	0.00651549	0.0219474	Up	1.65862
K02275	38.725	4.42939	1.62895	2.71917	0.00654455	0.0220312	Up	1.65696
K12288	192.574	1.73377	0.637734	2.71864	0.00655509	0.0220527	Up	1.65654
K04750	90.674	1.8686	0.687441	2.7182	0.0065638	0.0220541	Up	1.65651
K16168	8.77868	2.74629	1.01134	2.71548	0.00661793	0.0222002	Up	1.65364
K12290	53.7088	2.59225	0.954935	2.71459	0.00663588	0.0222117	Up	1.65342
K00867	100.442	1.48175	0.546359	2.71204	0.00668708	0.0223351	Up	1.65101
K01822	44.0445	2.62085	0.966529	2.71161	0.00669572	0.0223351	Up	1.65101
K03382	22.9319	1.46792	0.541376	2.71146	0.0066987	0.0223351	Up	1.65101
K19113	59.6318	1.70769	0.629609	2.7123	0.00668177	0.0223351	Up	1.65101
K06976	76.74	-1.05529	0.389293	-2.71079	0.00671239	0.0223409	Down	1.6509
K02394	99.6516	1.99172	0.734888	2.71023	0.00672362	0.0223643	Up	1.65045
K00131	122.349	-1.48141	0.546675	-2.70987	0.00673104	0.0223749	Down	1.65024
K02452	121.902	1.52446	0.562627	2.70953	0.00673782	0.0223826	Up	1.65009
K04844	72.7669	-1.52591	0.563247	-2.70913	0.00674602	0.0223826	Down	1.65009
K06169	110.88	1.89163	0.698197	2.70931	0.00674242	0.0223826	Up	1.65009
K08088	3.1415	3.92648	1.44989	2.70813	0.0067664	0.0224162	Up	1.64944
K14335	1.94354	-3.89851	1.44176	-2.70399	0.00685134	0.0226329	Down	1.64526
K01905	299.974	1.33864	0.495325	2.70255	0.00688099	0.0227167	Up	1.64366
K02538	1011.72	1.10939	0.410892	2.69996	0.00693471	0.0228372	Up	1.64136
K06138	18.2765	2.94626	1.09168	2.69883	0.00695835	0.0228724	Up	1.64069
K09908	65.8103	1.74667	0.647159	2.69898	0.00695514	0.0228724	Up	1.64069
K16819	16.6783	2.70722	1.00334	2.69821	0.00697144	0.0229012	Up	1.64014
K10797	24.5517	1.61984	0.600826	2.69603	0.00701722	0.0230033	Up	1.63821
K12148	29.9034	1.97584	0.732905	2.6959	0.00701987	0.0230033	Up	1.63821
K11208	157.606	1.94922	0.723133	2.69552	0.0070278	0.0230151	Up	1.63799
K00108	142.601	1.6361	0.607152	2.69471	0.00704509	0.0230574	Up	1.63719
K06141	162.474	1.94109	0.720686	2.69339	0.00707293	0.0231048	Up	1.6363
K02473	3.14861	4.14514	1.53937	2.69275	0.00708659	0.0231219	Up	1.63598
K19075	124.061	-1.2804	0.475592	-2.69222	0.00709782	0.0231301	Down	1.63582
K02465	40.0213	2.67735	0.995176	2.69033	0.00713822	0.0232234	Up	1.63407
K12262	148.891	1.78841	0.664787	2.69019	0.00714106	0.0232234	Up	1.63407
K02496	193.658	1.04251	0.387733	2.68872	0.00717261	0.0232879	Up	1.63287
K01975	136.784	1.16276	0.432815	2.68651	0.00722029	0.0234284	Up	1.63026
K09384	1584.13	-1.23913	0.461508	-2.68497	0.00725365	0.0235222	Down	1.62852
K02345	29.0124	1.59616	0.594675	2.68409	0.00727275	0.0235698	Up	1.62764
K07605	143.211	-1.48143	0.552461	-2.68151	0.00732906	0.0236967	Down	1.62531
K18850	234.527	1.44158	0.537647	2.68127	0.00733423	0.0236967	Up	1.62531
K15176	6.10645	-2.18185	0.814341	-2.67929	0.00737792	0.0237653	Down	1.62406
K07724	43.1547	1.87738	0.70112	2.67769	0.00741328	0.0238069	Up	1.6233
K13255	106.067	1.88173	0.702538	2.67848	0.00739578	0.0238069	Up	1.6233
K18540	127.761	1.26949	0.474093	2.67772	0.00741259	0.0238069	Up	1.6233
K02562	129.93	1.81449	0.67824	2.67529	0.00746651	0.0239633	Up	1.62045
K19418	520.257	-1.31349	0.491132	-2.67442	0.00748596	0.0240112	Down	1.61959
K07649	10.8726	2.85007	1.06585	2.67398	0.00749558	0.0240276	Up	1.61929
K13934	56.9972	2.1593	0.808136	2.67195	0.00754109	0.0241442	Up	1.61719
K13770	444.912	-1.05909	0.39644	-2.67149	0.00755151	0.0241524	Down	1.61704
K01576	20.3769	2.81186	1.05301	2.6703	0.00757827	0.0242194	Up	1.61584
K10108	348.4	1.6332	0.611669	2.67008	0.0075833	0.0242209	Up	1.61581
K07715	163.788	1.92375	0.720692	2.66931	0.00760067	0.0242617	Up	1.61508
K02611	96.745	1.85426	0.69551	2.66604	0.00767513	0.0244699	Up	1.61137
K09697	240.951	-1.14265	0.4289	-2.66414	0.00771854	0.0245936	Down	1.60918
K00247	74.6752	1.23638	0.464214	2.66339	0.00773578	0.0246189	Up	1.60873
K15584	4.66129	-4.45702	1.67332	-2.66358	0.00773149	0.0246189	Down	1.60873
K03527	18.331	4.25354	1.5977	2.66228	0.00776134	0.0246854	Up	1.60756
K16692	460.474	1.88429	0.707862	2.66194	0.00776906	0.0246952	Up	1.60739
K06899	82.5863	1.55835	0.585565	2.66129	0.00778429	0.0247288	Up	1.6068
K03981	262.273	1.08284	0.407192	2.65928	0.00783072	0.0248599	Up	1.6045
K05835	121.939	1.59546	0.600591	2.65648	0.00789614	0.0250241	Up	1.60164
K02591	152.823	1.39651	0.526888	2.65049	0.00803742	0.0254221	Up	1.59479
K03795	78.2126	-3.54214	1.33699	-2.64933	0.00806504	0.0254832	Down	1.59375
K13822	6.81183	2.63916	0.996332	2.64887	0.00807613	0.0254879	Up	1.59367
K02783	196.491	1.34031	0.506666	2.64535	0.0081606	0.0256982	Up	1.5901
K09978	40.6507	1.94234	0.734321	2.64509	0.008167	0.0256982	Up	1.5901
K02063	491.464	1.03854	0.393216	2.64114	0.00826285	0.0259536	Up	1.5858
K09949	395.558	1.03875	0.393446	2.64013	0.00828734	0.0260151	Up	1.58477
K14565	1.1917	-3.53896	1.34165	-2.63776	0.0083455	0.0261667	Down	1.58225
K11929	8.79237	2.13616	0.809968	2.63734	0.00835591	0.0261838	Up	1.58197
K05374	49.2148	2.36388	0.897189	2.63476	0.00841968	0.026337	Up	1.57943
K07224	163.158	1.24974	0.474635	2.63305	0.00846215	0.0264542	Up	1.57751
K08073	87.0029	-3.64732	1.3857	-2.63212	0.00848545	0.0264876	Down	1.57696
K16554	1.25872	2.55797	0.972838	2.62939	0.00855374	0.0266306	Up	1.57462
K06144	38.5374	2.43736	0.927311	2.62842	0.00857826	0.0266643	Up	1.57407
K10800	14.0752	4.24597	1.61556	2.62817	0.00858468	0.0266643	Up	1.57407
K07018	17.9494	-3.56321	1.35662	-2.62652	0.00862617	0.0267768	Down	1.57224
K16077	433.711	2.0377	0.777191	2.62188	0.0087447	0.027082	Up	1.56732
K18144	2.35221	4.7658	1.81847	2.62077	0.00877311	0.0271383	Up	1.56642
K02414	138.045	1.32798	0.507146	2.61854	0.0088307	0.0273005	Up	1.56383
K04082	124.494	1.10509	0.4221	2.61807	0.00884292	0.0273061	Up	1.56374
K07169	3.23875	3.74804	1.43181	2.61769	0.00885274	0.0273061	Up	1.56374
K09005	64.8821	-1.2672	0.484129	-2.61748	0.00885827	0.0273061	Down	1.56374
K11920	91.6831	1.92879	0.736806	2.61777	0.00885064	0.0273061	Up	1.56374
K07696	123.791	1.93701	0.740157	2.61703	0.0088698	0.0273258	Up	1.56343
K05898	134.413	1.34183	0.513455	2.61333	0.00896656	0.0275918	Up	1.55922
K19036	5.77684	3.18648	1.21955	2.61283	0.00897957	0.0276158	Up	1.55884
K03676	32.6039	1.69568	0.649352	2.61134	0.0090187	0.0276889	Up	1.55769
K06119	32.0487	4.23343	1.6214	2.61097	0.00902857	0.0277022	Up	1.55749
K14054	88.5015	1.89901	0.727915	2.60883	0.00908524	0.02786	Up	1.55502
K19804	247.915	1.07048	0.410504	2.60772	0.00911483	0.0279346	Up	1.55386
K13837	4.67532	-2.02434	0.779274	-2.59773	0.00938429	0.0286941	Down	1.54221
K18626	128.212	-2.02069	0.778034	-2.59718	0.0093993	0.028695	Down	1.54219
K07184	64.3649	1.68858	0.650665	2.59516	0.00945463	0.0288426	Up	1.53997
K00311	2.90139	-3.48301	1.34227	-2.59486	0.00946293	0.0288513	Down	1.53983
K03725	5.00683	-3.58098	1.38073	-2.59354	0.00949923	0.0289265	Down	1.5387
K13893	32.9541	4.32915	1.66944	2.59318	0.00950943	0.0289265	Up	1.5387
K06203	154.064	1.25725	0.484981	2.59236	0.00953198	0.0289619	Up	1.53817
K11891	717.469	1.43769	0.554961	2.59061	0.00958066	0.0290765	Up	1.53646
K13665	415.17	-1.77241	0.684916	-2.58779	0.00965952	0.0292991	Down	1.53315
K13749	19.6883	-2.14918	0.830832	-2.58678	0.00968783	0.0293681	Down	1.53212
K09971	129.584	1.32941	0.514257	2.58511	0.00973488	0.0294602	Up	1.53076
K03746	115.33	1.16825	0.452538	2.58155	0.00983576	0.0297316	Up	1.52678
K09933	133.004	1.3265	0.514045	2.58051	0.00986542	0.0298043	Up	1.52572
K02565	4.71053	-2.80488	1.08711	-2.58013	0.00987631	0.0298202	Down	1.52549
K03283	22.0488	1.11049	0.43044	2.5799	0.00988285	0.0298229	Up	1.52545
K08221	54.479	1.33211	0.517404	2.57459	0.0100358	0.0302671	Up	1.51903
K02188	2.8225	-3.93019	1.52688	-2.57401	0.0100529	0.0303015	Down	1.51854
K13630	16.4477	2.01855	0.785211	2.5707	0.0101492	0.0305399	Up	1.51513
K07733	46.2836	1.68998	0.657481	2.57038	0.0101587	0.030551	Up	1.51497
K05297	189.651	1.74357	0.678589	2.56941	0.0101873	0.0306196	Up	1.514
K07070	23.1785	1.85842	0.723828	2.56749	0.0102438	0.0307721	Up	1.51184
K09940	23.429	1.71177	0.667477	2.56454	0.0103314	0.0310096	Up	1.5085
K12141	2.96275	3.17993	1.24044	2.56356	0.0103605	0.0310521	Up	1.50791
K18919	16.1854	2.21778	0.86507	2.5637	0.0103562	0.0310521	Up	1.50791
K12988	8.97839	-4.95092	1.93283	-2.56148	0.0104227	0.0312209	Down	1.50555
K19784	206.383	1.24501	0.486252	2.56041	0.0104547	0.0312993	Up	1.50447
K05603	23.8177	3.05641	1.19424	2.55929	0.0104887	0.0313832	Up	1.5033
K08996	63.8172	1.85049	0.723281	2.55846	0.0105137	0.0314106	Up	1.50292
K11896	475.431	1.50644	0.588813	2.55843	0.0105147	0.0314106	Up	1.50292
K14415	2850.38	1.00675	0.393811	2.55642	0.0105754	0.0315714	Up	1.50071
K09023	90.884	1.8419	0.72165	2.55234	0.0107002	0.03189	Up	1.49634
K04516	52.6541	-1.64466	0.644544	-2.55166	0.010721	0.0319342	Down	1.49574
K04046	190.207	1.6267	0.638077	2.54938	0.0107914	0.0320897	Up	1.49363
K02322	2.77429	-4.4738	1.75533	-2.54869	0.0108129	0.0321356	Down	1.49301
K01146	121.309	1.61946	0.635541	2.54816	0.0108292	0.032166	Up	1.4926
K18334	64.3127	1.39302	0.546869	2.54726	0.0108572	0.0322313	Up	1.49172
K01303	267.321	-1.02616	0.403013	-2.54622	0.0108896	0.032289	Down	1.49094
K04081	54.3807	2.01224	0.79034	2.54605	0.010895	0.032289	Up	1.49094
K04648	47.7313	-1.32615	0.521013	-2.54533	0.0109173	0.0323192	Down	1.49054
K05709	26.0936	2.15857	0.848577	2.54375	0.010967	0.0324483	Up	1.48881
K06957	206.512	1.5498	0.60938	2.54324	0.0109829	0.0324771	Up	1.48842
K01347	125.245	1.83607	0.722159	2.54247	0.0110073	0.032531	Up	1.4877
K11644	1.84078	-2.40706	0.947428	-2.54063	0.0110654	0.0326299	Down	1.48638
K18301	37.0629	3.20363	1.26089	2.54077	0.0110608	0.0326299	Up	1.48638
K00192	6.37794	-2.05205	0.807835	-2.54018	0.0110796	0.0326538	Down	1.48607
K11991	244.887	-1.22517	0.482549	-2.53897	0.0111181	0.0327307	Down	1.48505
K02458	118.21	1.94685	0.767855	2.53545	0.0112304	0.0330249	Up	1.48116
K10481	24.4219	-2.20373	0.869575	-2.53426	0.0112686	0.0331003	Down	1.48017
K11534	152.823	1.07583	0.424721	2.53303	0.0113082	0.0331799	Up	1.47913
K04767	231.32	1.1066	0.436915	2.53276	0.0113168	0.0331868	Up	1.47903
K02327	3.66185	-5.61208	2.21666	-2.53177	0.0113487	0.0332619	Down	1.47805
K03078	168.86	1.39285	0.550378	2.53072	0.011383	0.0333441	Up	1.47698
K00332	22.0645	1.44073	0.569459	2.52999	0.0114065	0.0333856	Up	1.47644
K05499	110.403	1.76693	0.698423	2.52989	0.0114098	0.0333856	Up	1.47644
K07493	29902.7	-1.04855	0.41472	-2.52833	0.0114606	0.0335157	Down	1.47475
K03291	353.924	1.38294	0.547134	2.5276	0.0114844	0.0335299	Up	1.47457
K19335	49.6179	1.97425	0.78101	2.52782	0.0114773	0.0335299	Up	1.47457
K09896	41.5338	1.30991	0.518729	2.52523	0.0115623	0.0337201	Up	1.47211
K02204	69.8485	-1.52146	0.602717	-2.52434	0.0115916	0.0337686	Down	1.47149
K19721	49.9436	-1.76185	0.698062	-2.52392	0.0116055	0.0337903	Down	1.47121
K02344	97.9267	1.53024	0.606852	2.5216	0.0116823	0.0339738	Up	1.46886
K02596	19.9648	-3.7832	1.50183	-2.51906	0.0117668	0.0341662	Down	1.4664
K19116	376.234	1.52148	0.604255	2.51795	0.011804	0.0342369	Up	1.46551
K03260	19.6104	-3.20514	1.27318	-2.51742	0.0118217	0.0342694	Down	1.46509
K07711	276.786	1.58696	0.630572	2.5167	0.0118459	0.0343206	Up	1.46444
K02752	1608.22	1.05132	0.418355	2.51299	0.0119714	0.0345709	Up	1.46129
K16348	11.4306	1.99427	0.794721	2.5094	0.0120937	0.0349053	Up	1.45711
K13695	110.164	1.45623	0.580961	2.50659	0.0121902	0.0351049	Up	1.45463
K06198	49.6468	-1.31278	0.52393	-2.50565	0.0122227	0.0351628	Down	1.45392
K07498	131.687	1.4379	0.57391	2.50544	0.0122298	0.035164	Up	1.4539
K01557	2.11064	4.01245	1.60203	2.5046	0.012259	0.0352178	Up	1.45324
K01212	6754.55	-1.0025	0.400751	-2.50155	0.012365	0.0354374	Down	1.45054
K17624	827.732	1.09388	0.437333	2.50125	0.0123756	0.0354487	Up	1.4504
K09701	63.0532	2.55502	1.02256	2.49865	0.0124666	0.03569	Up	1.44745
K19736	22.0489	1.87057	0.74872	2.49835	0.0124771	0.0357009	Up	1.44732
K02618	219.229	1.61788	0.647713	2.49783	0.0124956	0.0357344	Up	1.44691
K11675	40.9061	-2.63191	1.05458	-2.49569	0.0125713	0.0358929	Down	1.44499
K01160	192.173	1.0547	0.423087	2.49286	0.0126718	0.0361214	Up	1.44224
K02364	499.412	1.25612	0.504034	2.49213	0.0126979	0.0361377	Up	1.44204
K03483	1101.11	1.20421	0.483663	2.48976	0.0127828	0.0363401	Up	1.43961
K18842	29.0994	1.85526	0.746382	2.48568	0.0129306	0.0366817	Up	1.43555
K19780	2.32357	3.21757	1.29582	2.48304	0.0130266	0.0369228	Up	1.43271
K18922	35.936	1.91826	0.772902	2.48189	0.0130688	0.0369945	Up	1.43186
K02656	6.56229	1.83296	0.739364	2.4791	0.0131713	0.0372649	Up	1.4287
K19587	29.6595	2.5677	1.036	2.47849	0.0131941	0.0373095	Up	1.42818
K18923	16.814	2.07409	0.837037	2.47789	0.0132162	0.037352	Up	1.42769
K10763	171.072	1.01885	0.411527	2.47579	0.0132943	0.0374927	Up	1.42605
K09801	59.4539	1.16278	0.470229	2.47281	0.0134057	0.0376867	Up	1.42381
K02957	1.15098	-3.00644	1.21711	-2.47014	0.0135062	0.0379088	Down	1.42126
K03093	30.1748	1.0827	0.438466	2.4693	0.0135379	0.0379577	Up	1.4207
K13620	106.66	2.03673	0.824946	2.46892	0.013552	0.0379772	Up	1.42048
K02590	11.3543	-1.84399	0.746948	-2.4687	0.0135604	0.0379805	Down	1.42044
K06205	272.596	1.10602	0.448854	2.4641	0.0137358	0.0383337	Up	1.41642
K05596	156.411	1.84022	0.747164	2.46294	0.0137802	0.0383887	Up	1.4158
K11926	62.307	1.79225	0.72773	2.4628	0.0137858	0.0383887	Up	1.4158
K02457	94.9306	1.5362	0.624773	2.45881	0.01394	0.0387164	Up	1.4121
K05782	233.018	1.14324	0.465162	2.45773	0.0139818	0.0387921	Up	1.41126
K00449	71.596	1.33387	0.543479	2.45431	0.0141153	0.0391011	Up	1.40781
K13053	93.2635	1.63216	0.665494	2.45256	0.0141845	0.0392517	Up	1.40614
K06917	222.321	1.44014	0.587303	2.45212	0.0142016	0.039258	Up	1.40607
K08317	131.924	1.68639	0.68768	2.45229	0.014195	0.039258	Up	1.40607
K06039	55.4116	1.37176	0.559993	2.44959	0.0143017	0.0394593	Up	1.40385
K00893	2621.58	-1.39221	0.568511	-2.44886	0.0143309	0.0394919	Down	1.40349
K16915	43.1238	1.02407	0.41817	2.44892	0.0143284	0.0394919	Up	1.40349
K05814	200.217	1.1752	0.480104	2.4478	0.0143731	0.0395876	Up	1.40244
K16959	42.776	-1.52816	0.624505	-2.44699	0.0144055	0.0396563	Down	1.40169
K01720	99.8072	1.46083	0.597371	2.44543	0.0144678	0.0398071	Up	1.40004
K05658	6.23917	1.42263	0.58214	2.44379	0.0145338	0.039968	Up	1.39829
K15790	10.3856	3.48457	1.42624	2.44319	0.014558	0.0400137	Up	1.39779
K05781	205.534	1.01356	0.414983	2.44241	0.0145895	0.0400796	Up	1.39708
K06313	227.15	-1.22441	0.501413	-2.44192	0.0146095	0.0401137	Down	1.39671
K02169	299.616	1.08886	0.446001	2.44138	0.0146311	0.0401316	Up	1.39651
K13573	16.1629	1.62978	0.668394	2.43835	0.0147544	0.040407	Up	1.39354
K07643	164.206	1.73754	0.712903	2.43728	0.0147983	0.0405062	Up	1.39248
K02402	45.7781	1.96194	0.805804	2.43477	0.0149014	0.0407328	Up	1.39006
K12573	35.9879	-1.24111	0.509761	-2.4347	0.0149041	0.0407328	Down	1.39006
K02812	24.3641	1.99807	0.822465	2.42937	0.015125	0.0412303	Up	1.38478
K08322	381.146	1.04129	0.428658	2.42918	0.0151329	0.0412305	Up	1.38478
K14744	23.8369	1.95185	0.803749	2.42843	0.0151646	0.0412868	Up	1.38419
K01638	263.032	1.47196	0.606411	2.42733	0.0152102	0.0413055	Up	1.38399
K03560	79.9742	1.02208	0.421118	2.42706	0.0152216	0.0413055	Up	1.38399
K07236	59.2796	1.54732	0.637535	2.42704	0.0152227	0.0413055	Up	1.38399
K07300	120.77	1.37982	0.568362	2.42771	0.0151943	0.0413055	Up	1.38399
K19131	3.04709	3.99777	1.647	2.42731	0.0152114	0.0413055	Up	1.38399
K02100	2082.2	1.02163	0.420979	2.42681	0.0152323	0.0413103	Up	1.38394
K16091	205.495	1.75619	0.724189	2.42504	0.0153067	0.0414485	Up	1.38249
K18675	240.37	-1.0767	0.444056	-2.4247	0.0153209	0.0414659	Down	1.38231
K03763	100.088	-2.06669	0.85294	-2.42303	0.0153918	0.0416152	Down	1.38075
K02086	89.681	-1.08813	0.449527	-2.42061	0.0154945	0.0418342	Down	1.37847
K11685	103.612	1.26511	0.5229	2.41942	0.0155453	0.0419245	Up	1.37753
K11740	237.802	-1.45498	0.601378	-2.41941	0.0155458	0.0419245	Down	1.37753
K16515	82.4983	1.45917	0.603359	2.41842	0.0155882	0.0419898	Up	1.37686
K16516	110.632	1.2624	0.522024	2.41829	0.0155937	0.0419898	Up	1.37686
K15667	82.0115	-2.48436	1.02787	-2.41699	0.0156493	0.0421182	Down	1.37553
K08160	428.853	1.40515	0.582854	2.41081	0.0159173	0.042731	Up	1.36926
K16138	79.4321	1.52296	0.632495	2.40786	0.0160465	0.0430125	Up	1.36641
K03222	29.457	1.27185	0.528332	2.40729	0.0160713	0.0430571	Up	1.36596
K02386	76.5445	1.78182	0.741017	2.40456	0.016192	0.043293	Up	1.36358
K06140	62.5989	1.6322	0.678925	2.4041	0.0162124	0.0433256	Up	1.36326
K04015	210.141	1.01393	0.421929	2.40308	0.0162576	0.0433922	Up	1.36259
K11893	218.332	1.38799	0.578113	2.40089	0.016355	0.0435913	Up	1.3606
K06992	4.60817	-5.79559	2.41573	-2.3991	0.0164353	0.0437452	Down	1.35907
K19171	4940.62	-1.09423	0.457208	-2.39329	0.0166982	0.0443778	Down	1.35283
K07346	671.916	1.40771	0.588807	2.39078	0.0168125	0.0446591	Up	1.35009
K07686	90.3561	1.31482	0.550306	2.38926	0.0168824	0.0448002	Up	1.34872
K12146	171.62	1.58066	0.662638	2.3854	0.0170605	0.0452274	Up	1.3446
K01400	839.635	-1.36656	0.574071	-2.38046	0.0172909	0.0457695	Down	1.33942
K12998	312.44	-1.00516	0.422645	-2.37825	0.0173949	0.0459531	Down	1.33769
K03227	21.5712	1.33204	0.560552	2.3763	0.0174873	0.0461281	Up	1.33603
K12525	5.5703	-2.19353	0.924186	-2.37348	0.0176215	0.046459	Down	1.33293
K11494	1.63881	-3.78097	1.59383	-2.37225	0.0176799	0.04659	Down	1.33171
K00499	48.6431	1.40186	0.591824	2.3687	0.0178505	0.0469645	Up	1.32823
K07350	284.692	1.5867	0.669899	2.36856	0.0178575	0.0469645	Up	1.32823
K11292	7.42073	1.76522	0.745476	2.36791	0.017889	0.0470241	Up	1.32768
K07395	49.3718	2.51356	1.06168	2.36754	0.0179069	0.0470477	Up	1.32746
K10934	21.5853	1.5675	0.662815	2.36491	0.0180344	0.0472562	Up	1.32554
K15376	17.1264	1.51178	0.639283	2.3648	0.0180397	0.0472562	Up	1.32554
K01535	7.54077	-3.257	1.37745	-2.36452	0.0180535	0.0472689	Down	1.32542
K07723	0.813488	-2.00303	0.847628	-2.3631	0.0181226	0.0474266	Down	1.32398
K19090	149.185	-1.2402	0.52539	-2.36053	0.0182491	0.0477104	Down	1.32139
K14972	1.97118	-3.75333	1.59061	-2.35968	0.0182905	0.0477716	Down	1.32083
K01216	2141.42	-1.011	0.428682	-2.35839	0.0183543	0.0479146	Down	1.31953
K07489	14.7166	2.65113	1.12425	2.35813	0.0183675	0.0479253	Up	1.31943
K06297	178.484	-1.14702	0.486728	-2.35659	0.0184437	0.0481005	Down	1.31785
K06945	1.02135	-2.81915	1.19741	-2.35437	0.0185543	0.0482466	Down	1.31653
K07485	3797.44	-1.02747	0.436469	-2.35406	0.0185699	0.0482634	Down	1.31638
K15576	91.4772	2.2976	0.976357	2.35324	0.0186106	0.0483221	Up	1.31585
K12990	534.951	-1.25539	0.533665	-2.35239	0.0186532	0.0483615	Down	1.3155
K16261	1.32768	3.92701	1.67091	2.35023	0.018762	0.0486198	Up	1.31319
K02489	637.265	1.17166	0.498653	2.34964	0.0187914	0.0486471	Up	1.31294
K19000	29.8309	1.6314	0.694287	2.34974	0.0187865	0.0486471	Up	1.31294
K18968	136.24	1.69877	0.723216	2.34891	0.0188287	0.0486974	Up	1.31249
K18775	14.0895	1.5002	0.640265	2.34309	0.0191247	0.0492946	Up	1.3072
K02403	33.4053	1.76898	0.75514	2.34258	0.019151	0.0493384	Up	1.30681
K19161	6.37206	2.83156	1.20987	2.34039	0.0192639	0.0495436	Up	1.30501
K01690	186.707	1.51819	0.648998	2.33929	0.0193204	0.0496302	Up	1.30425
K11937	84.258	1.28547	0.549713	2.33843	0.0193649	0.0497203	Up	1.30347
K11717	115.167	-1.03493	0.442652	-2.33803	0.0193857	0.0497497	Down	1.30321
